# Supplementary material for: Improved Functional Causal Likelihood-Based Causal Discovery Method for Diabetes Risk Factors
Source: Hindawi journal article supplement (doi:10.1155/2021/5552085), 2021-05-14
Supplement: f1 [file 5552085.f1.zip]

| Pregnanci | Glucose00 | BloodPres | SkinThick | Insulin00 | BMI00 | DiabetesF | Age00 | Outcome00 |
|-----------|-----------|-----------|-----------|-----------|-------|-----------|-------|-----------|
| 2         | 74        | 72.4      | 29.34     | 153.74    | 32.65 | 0.102     | 22    | 0         |
| 2         | 74        | 72.4      | 29.34     | 153.74    | 32.65 | 0.102     | 22    | 0         |
| 3         | 80        | 72.4      | 29.34     | 153.74    | 32.65 | 0.174     | 22    | 0         |
| 3         | 80        | 72.4      | 29.34     | 153.74    | 32.65 | 0.174     | 22    | 0         |
| 3         | 80        | 72.4      | 29.34     | 153.74    | 32.65 | 0.174     | 22    | 0         |
| 3         | 80        | 72.4      | 29.34     | 153.74    | 32.65 | 0.174     | 22    | 0         |
| 3         | 80        | 72.4      | 29.34     | 153.74    | 32.65 | 0.174     | 22    | 0         |
| 2         | 84        | 72.4      | 29.34     | 153.74    | 32.65 | 0.304     | 21    | 0         |
| 2         | 84        | 72.4      | 29.34     | 153.74    | 32.65 | 0.304     | 21    | 0         |
| 0         | 94        | 72.4      | 29.34     | 153.74    | 32.65 | 0.256     | 25    | 0         |
| 0         | 94        | 72.4      | 29.34     | 153.74    | 32.65 | 0.256     | 25    | 0         |
| 0         | 94        | 72.4      | 29.34     | 153.74    | 32.65 | 0.256     | 25    | 0         |
| 0         | 94        | 72.4      | 29.34     | 153.74    | 32.65 | 0.256     | 25    | 0         |
| 7         | 105       | 72.4      | 29.34     | 153.74    | 32.65 | 0.305     | 24    | 0         |
| 7         | 105       | 72.4      | 29.34     | 153.74    | 32.65 | 0.305     | 24    | 0         |
| 6         | 114       | 72.4      | 29.34     | 153.74    | 32.65 | 0.189     | 26    | 0         |
| 10        | 115       | 72.4      | 29.34     | 153.74    | 32.65 | 0.261     | 30    | 1         |
| 10        | 115       | 72.4      | 29.34     | 153.74    | 32.65 | 0.261     | 30    | 1         |
| 10        | 115       | 72.4      | 29.34     | 153.74    | 32.65 | 0.261     | 30    | 1         |
| 5         | 136       | 82        | 29.34     | 153.74    | 32.65 | 0.64      | 69    | 0         |
| 5         | 136       | 82        | 29.34     | 153.74    | 32.65 | 0.64      | 69    | 0         |
| 5         | 136       | 82        | 29.34     | 153.74    | 32.65 | 0.64      | 69    | 0         |
| 0         | 102       | 75        | 23        | 153.74    | 32.65 | 0.572     | 21    | 0         |
| 0         | 102       | 75        | 23        | 153.74    | 32.65 | 0.572     | 21    | 0         |
| 0         | 102       | 75        | 23        | 153.74    | 32.65 | 0.572     | 21    | 0         |
| 0         | 118       | 64        | 23        | 89        | 32.65 | 1.731     | 21    | 0         |
| 0         | 118       | 64        | 23        | 89        | 32.65 | 1.731     | 21    | 0         |
| 0         | 118       | 64        | 23        | 89        | 32.65 | 1.731     | 21    | 0         |
| 1         | 83        | 68        | 29.34     | 153.74    | 18.2  | 0.624     | 27    | 0         |
| 1         | 83        | 68        | 29.34     | 153.74    | 18.2  | 0.624     | 27    | 0         |
| 1         | 83        | 68        | 29.34     | 153.74    | 18.2  | 0.624     | 27    | 0         |
| 1         | 83        | 68        | 29.34     | 153.74    | 18.2  | 0.624     | 27    | 0         |
| 1         | 97        | 70        | 15        | 153.74    | 18.2  | 0.147     | 21    | 0         |
| 1         | 97        | 70        | 15        | 153.74    | 18.2  | 0.147     | 21    | 0         |
| 1         | 97        | 70        | 15        | 153.74    | 18.2  | 0.147     | 21    | 0         |
| 1         | 97        | 64        | 19        | 82        | 18.2  | 0.299     | 21    | 0         |
| 0         | 104       | 76        | 29.34     | 153.74    | 18.4  | 0.582     | 27    | 0         |
| 0         | 104       | 76        | 29.34     | 153.74    | 18.4  | 0.582     | 27    | 0         |
| 1         | 80        | 55        | 29.34     | 153.74    | 19.1  | 0.258     | 21    | 0         |
| 1         | 80        | 55        | 29.34     | 153.74    | 19.1  | 0.258     | 21    | 0         |
| 3         | 99        | 80        | 11        | 64        | 19.3  | 0.284     | 30    | 0         |
| 3         | 99        | 80        | 11        | 64        | 19.3  | 0.284     | 30    | 0         |
| 3         | 99        | 80        | 11        | 64        | 19.3  | 0.284     | 30    | 0         |
| 1         | 103       | 80        | 11        | 82        | 19.4  | 0.491     | 22    | 0         |
| 1         | 103       | 80        | 11        | 82        | 19.4  | 0.491     | 22    | 0         |
| 1         | 92        | 62        | 25        | 41        | 19.5  | 0.482     | 25    | 0         |
| 1         | 92        | 62        | 25        | 41        | 19.5  | 0.482     | 25    | 0         |
| 1         | 92        | 62        | 25        | 41        | 19.5  | 0.482     | 25    | 0         |
| 1         | 100       | 74        | 12        | 46        | 19.5  | 0.149     | 28    | 0         |
| 1         | 100       | 74        | 12        | 46        | 19.5  | 0.149     | 28    | 0         |

|   |     |      |       |        |      |       |    |   |
|---|-----|------|-------|--------|------|-------|----|---|
| 1 | 100 | 74   | 12    | 46     | 19.5 | 0.149 | 28 | 0 |
| 2 | 119 | 72.4 | 29.34 | 153.74 | 19.6 | 0.832 | 72 | 0 |
| 2 | 119 | 72.4 | 29.34 | 153.74 | 19.6 | 0.832 | 72 | 0 |
| 2 | 119 | 72.4 | 29.34 | 153.74 | 19.6 | 0.832 | 72 | 0 |
| 1 | 95  | 66   | 13    | 38     | 19.6 | 0.334 | 25 | 0 |
| 1 | 95  | 66   | 13    | 38     | 19.6 | 0.334 | 25 | 0 |
| 6 | 129 | 90   | 7     | 326    | 19.6 | 0.582 | 60 | 0 |
| 0 | 105 | 68   | 22    | 153.74 | 20   | 0.236 | 22 | 0 |
| 0 | 105 | 68   | 22    | 153.74 | 20   | 0.236 | 22 | 0 |
| 0 | 105 | 68   | 22    | 153.74 | 20   | 0.236 | 22 | 0 |
| 2 | 68  | 62   | 13    | 15     | 20.1 | 0.257 | 23 | 0 |
| 2 | 68  | 62   | 13    | 15     | 20.1 | 0.257 | 23 | 0 |
| 2 | 68  | 62   | 13    | 15     | 20.1 | 0.257 | 23 | 0 |
| 0 | 136 | 74   | 49    | 220    | 20.1 | 0.82  | 44 | 1 |
| 0 | 136 | 74   | 49    | 220    | 20.1 | 0.82  | 44 | 1 |
| 2 | 99  | 70   | 16    | 44     | 20.4 | 0.235 | 27 | 0 |
| 2 | 99  | 70   | 16    | 44     | 20.4 | 0.235 | 27 | 0 |
| 1 | 71  | 48   | 18    | 76     | 20.4 | 0.323 | 22 | 0 |
| 1 | 71  | 48   | 18    | 76     | 20.4 | 0.323 | 22 | 0 |
| 4 | 96  | 56   | 17    | 49     | 20.8 | 0.34  | 26 | 0 |
| 4 | 96  | 56   | 17    | 49     | 20.8 | 0.34  | 26 | 0 |
| 9 | 120 | 72   | 22    | 56     | 20.8 | 0.733 | 48 | 0 |
| 9 | 120 | 72   | 22    | 56     | 20.8 | 0.733 | 48 | 0 |
| 9 | 120 | 72   | 22    | 56     | 20.8 | 0.733 | 48 | 0 |
| 3 | 150 | 76   | 29.34 | 153.74 | 21   | 0.207 | 37 | 0 |
| 3 | 150 | 76   | 29.34 | 153.74 | 21   | 0.207 | 37 | 0 |
| 3 | 150 | 76   | 29.34 | 153.74 | 21   | 0.207 | 37 | 0 |
| 0 | 101 | 64   | 17    | 153.74 | 21   | 0.252 | 21 | 0 |
| 0 | 101 | 64   | 17    | 153.74 | 21   | 0.252 | 21 | 0 |
| 0 | 101 | 64   | 17    | 153.74 | 21   | 0.252 | 21 | 0 |
| 0 | 73  | 72.4 | 29.34 | 153.74 | 21.1 | 0.342 | 25 | 0 |
| 0 | 73  | 72.4 | 29.34 | 153.74 | 21.1 | 0.342 | 25 | 0 |
| 3 | 82  | 70   | 29.34 | 153.74 | 21.1 | 0.389 | 25 | 0 |
| 3 | 82  | 70   | 29.34 | 153.74 | 21.1 | 0.389 | 25 | 0 |
| 3 | 82  | 70   | 29.34 | 153.74 | 21.1 | 0.389 | 25 | 0 |
| 3 | 82  | 70   | 29.34 | 153.74 | 21.1 | 0.389 | 25 | 0 |
| 3 | 128 | 78   | 29.34 | 153.74 | 21.1 | 0.268 | 55 | 0 |
| 3 | 128 | 78   | 29.34 | 153.74 | 21.1 | 0.268 | 55 | 0 |
| 3 | 128 | 78   | 29.34 | 153.74 | 21.1 | 0.268 | 55 | 0 |
| 2 | 96  | 68   | 13    | 49     | 21.1 | 0.647 | 26 | 0 |
| 2 | 96  | 68   | 13    | 49     | 21.1 | 0.647 | 26 | 0 |
| 2 | 96  | 68   | 13    | 49     | 21.1 | 0.647 | 26 | 0 |
| 1 | 82  | 64   | 13    | 95     | 21.2 | 0.415 | 23 | 0 |
| 1 | 82  | 64   | 13    | 95     | 21.2 | 0.415 | 23 | 0 |
| 1 | 82  | 64   | 13    | 95     | 21.2 | 0.415 | 23 | 0 |
| 0 | 57  | 60   | 29.34 | 153.74 | 21.7 | 0.735 | 67 | 0 |
| 0 | 57  | 60   | 29.34 | 153.74 | 21.7 | 0.735 | 67 | 0 |
| 1 | 71  | 62   | 29.34 | 153.74 | 21.8 | 0.416 | 26 | 0 |
| 1 | 71  | 62   | 29.34 | 153.74 | 21.8 | 0.416 | 26 | 0 |
| 1 | 71  | 62   | 29.34 | 153.74 | 21.8 | 0.416 | 26 | 0 |
| 3 | 87  | 60   | 18    | 153.74 | 21.8 | 0.444 | 21 | 0 |

|   |     |      |       |        |      |       |    |   |
|---|-----|------|-------|--------|------|-------|----|---|
| 3 | 99  | 62   | 19    | 74     | 21.8 | 0.279 | 26 | 0 |
| 3 | 99  | 62   | 19    | 74     | 21.8 | 0.279 | 26 | 0 |
| 3 | 99  | 62   | 19    | 74     | 21.8 | 0.279 | 26 | 0 |
| 2 | 101 | 58   | 35    | 90     | 21.8 | 0.155 | 22 | 0 |
| 2 | 101 | 58   | 35    | 90     | 21.8 | 0.155 | 22 | 0 |
| 2 | 101 | 58   | 35    | 90     | 21.8 | 0.155 | 22 | 0 |
| 0 | 124 | 56   | 13    | 105    | 21.8 | 0.452 | 21 | 0 |
| 0 | 124 | 56   | 13    | 105    | 21.8 | 0.452 | 21 | 0 |
| 0 | 124 | 56   | 13    | 105    | 21.8 | 0.452 | 21 | 0 |
| 0 | 161 | 50   | 29.34 | 153.74 | 21.9 | 0.254 | 65 | 0 |
| 0 | 161 | 50   | 29.34 | 153.74 | 21.9 | 0.254 | 65 | 0 |
| 0 | 101 | 62   | 29.34 | 153.74 | 21.9 | 0.336 | 25 | 0 |
| 0 | 101 | 62   | 29.34 | 153.74 | 21.9 | 0.336 | 25 | 0 |
| 0 | 101 | 62   | 29.34 | 153.74 | 21.9 | 0.336 | 25 | 0 |
| 0 | 101 | 62   | 29.34 | 153.74 | 21.9 | 0.336 | 25 | 0 |
| 4 | 114 | 65   | 29.34 | 153.74 | 21.9 | 0.432 | 37 | 0 |
| 4 | 114 | 65   | 29.34 | 153.74 | 21.9 | 0.432 | 37 | 0 |
| 4 | 114 | 65   | 29.34 | 153.74 | 21.9 | 0.432 | 37 | 0 |
| 4 | 116 | 72   | 12    | 87     | 22.1 | 0.463 | 37 | 0 |
| 4 | 116 | 72   | 12    | 87     | 22.1 | 0.463 | 37 | 0 |
| 4 | 116 | 72   | 12    | 87     | 22.1 | 0.463 | 37 | 0 |
| 0 | 139 | 62   | 17    | 210    | 22.1 | 0.207 | 21 | 0 |
| 0 | 139 | 62   | 17    | 210    | 22.1 | 0.207 | 21 | 0 |
| 0 | 139 | 62   | 17    | 210    | 22.1 | 0.207 | 21 | 0 |
| 2 | 99  | 72.4 | 29.34 | 153.74 | 22.2 | 0.108 | 23 | 0 |
| 2 | 99  | 72.4 | 29.34 | 153.74 | 22.2 | 0.108 | 23 | 0 |
| 2 | 99  | 72.4 | 29.34 | 153.74 | 22.2 | 0.108 | 23 | 0 |
| 2 | 99  | 72.4 | 29.34 | 153.74 | 22.2 | 0.108 | 23 | 0 |
| 1 | 119 | 54   | 13    | 50     | 22.3 | 0.205 | 24 | 0 |
| 1 | 119 | 54   | 13    | 50     | 22.3 | 0.205 | 24 | 0 |
| 1 | 119 | 54   | 13    | 50     | 22.3 | 0.205 | 24 | 0 |
| 1 | 96  | 122  | 29.34 | 153.74 | 22.4 | 0.207 | 27 | 0 |
| 1 | 96  | 122  | 29.34 | 153.74 | 22.4 | 0.207 | 27 | 0 |
| 1 | 96  | 122  | 29.34 | 153.74 | 22.4 | 0.207 | 27 | 0 |
| 3 | 113 | 44   | 13    | 153.74 | 22.4 | 0.14  | 22 | 0 |
| 3 | 113 | 44   | 13    | 153.74 | 22.4 | 0.14  | 22 | 0 |
| 9 | 89  | 62   | 29.34 | 153.74 | 22.5 | 0.142 | 33 | 0 |
| 9 | 89  | 62   | 29.34 | 153.74 | 22.5 | 0.142 | 33 | 0 |
| 9 | 89  | 62   | 29.34 | 153.74 | 22.5 | 0.142 | 33 | 0 |
| 0 | 125 | 96   | 29.34 | 153.74 | 22.5 | 0.262 | 21 | 0 |
| 0 | 125 | 96   | 29.34 | 153.74 | 22.5 | 0.262 | 21 | 0 |
| 0 | 125 | 96   | 29.34 | 153.74 | 22.5 | 0.262 | 21 | 0 |
| 1 | 93  | 56   | 11    | 153.74 | 22.5 | 0.417 | 22 | 0 |
| 1 | 93  | 56   | 11    | 153.74 | 22.5 | 0.417 | 22 | 0 |
| 3 | 111 | 62   | 29.34 | 153.74 | 22.6 | 0.142 | 21 | 0 |
| 3 | 111 | 62   | 29.34 | 153.74 | 22.6 | 0.142 | 21 | 0 |
| 2 | 130 | 96   | 29.34 | 153.74 | 22.6 | 0.268 | 21 | 0 |
| 2 | 130 | 96   | 29.34 | 153.74 | 22.6 | 0.268 | 21 | 0 |
| 7 | 106 | 92   | 18    | 153.74 | 22.7 | 0.235 | 48 | 0 |
| 7 | 106 | 92   | 18    | 153.74 | 22.7 | 0.235 | 48 | 0 |
| 2 | 175 | 88   | 29.34 | 153.74 | 22.9 | 0.326 | 22 | 0 |

|    |     |      |       |        |      |       |    |   |
|----|-----|------|-------|--------|------|-------|----|---|
| 2  | 175 | 88   | 29.34 | 153.74 | 22.9 | 0.326 | 22 | 0 |
| 2  | 175 | 88   | 29.34 | 153.74 | 22.9 | 0.326 | 22 | 0 |
| 3  | 107 | 62   | 13    | 48     | 22.9 | 0.678 | 23 | 1 |
| 3  | 107 | 62   | 13    | 48     | 22.9 | 0.678 | 23 | 1 |
| 3  | 122 | 78   | 29.34 | 153.74 | 23   | 0.254 | 40 | 0 |
| 3  | 122 | 78   | 29.34 | 153.74 | 23   | 0.254 | 40 | 0 |
| 1  | 73  | 50   | 10    | 153.74 | 23   | 0.248 | 21 | 0 |
| 1  | 73  | 50   | 10    | 153.74 | 23   | 0.248 | 21 | 0 |
| 3  | 130 | 64   | 29.34 | 153.74 | 23.1 | 0.314 | 22 | 0 |
| 3  | 130 | 64   | 29.34 | 153.74 | 23.1 | 0.314 | 22 | 0 |
| 3  | 130 | 64   | 29.34 | 153.74 | 23.1 | 0.314 | 22 | 0 |
| 10 | 94  | 72   | 18    | 153.74 | 23.1 | 0.595 | 56 | 0 |
| 10 | 94  | 72   | 18    | 153.74 | 23.1 | 0.595 | 56 | 0 |
| 10 | 94  | 72   | 18    | 153.74 | 23.1 | 0.595 | 56 | 0 |
| 8  | 118 | 72   | 19    | 153.74 | 23.1 | 1.476 | 46 | 0 |
| 8  | 118 | 72   | 19    | 153.74 | 23.1 | 1.476 | 46 | 0 |
| 1  | 109 | 38   | 18    | 120    | 23.1 | 0.407 | 26 | 0 |
| 1  | 109 | 38   | 18    | 120    | 23.1 | 0.407 | 26 | 0 |
| 1  | 109 | 38   | 18    | 120    | 23.1 | 0.407 | 26 | 0 |
| 6  | 87  | 80   | 29.34 | 153.74 | 23.2 | 0.084 | 32 | 0 |
| 6  | 87  | 80   | 29.34 | 153.74 | 23.2 | 0.084 | 32 | 0 |
| 4  | 99  | 76   | 15    | 51     | 23.2 | 0.223 | 21 | 0 |
| 4  | 99  | 76   | 15    | 51     | 23.2 | 0.223 | 21 | 0 |
| 4  | 99  | 76   | 15    | 51     | 23.2 | 0.223 | 21 | 0 |
| 2  | 105 | 75   | 29.34 | 153.74 | 23.3 | 0.56  | 53 | 0 |
| 2  | 105 | 75   | 29.34 | 153.74 | 23.3 | 0.56  | 53 | 0 |
| 2  | 105 | 75   | 29.34 | 153.74 | 23.3 | 0.56  | 53 | 0 |
| 1  | 167 | 74   | 17    | 144    | 23.4 | 0.447 | 33 | 1 |
| 1  | 167 | 74   | 17    | 144    | 23.4 | 0.447 | 33 | 1 |
| 1  | 167 | 74   | 17    | 144    | 23.4 | 0.447 | 33 | 1 |
| 3  | 116 | 72.4 | 29.34 | 153.74 | 23.5 | 0.187 | 23 | 0 |
| 3  | 116 | 72.4 | 29.34 | 153.74 | 23.5 | 0.187 | 23 | 0 |
| 3  | 116 | 72.4 | 29.34 | 153.74 | 23.5 | 0.187 | 23 | 0 |
| 2  | 90  | 60   | 29.34 | 153.74 | 23.5 | 0.191 | 25 | 0 |
| 2  | 90  | 60   | 29.34 | 153.74 | 23.5 | 0.191 | 25 | 0 |
| 2  | 90  | 60   | 29.34 | 153.74 | 23.5 | 0.191 | 25 | 0 |
| 6  | 194 | 78   | 29.34 | 153.74 | 23.5 | 0.129 | 59 | 1 |
| 6  | 194 | 78   | 29.34 | 153.74 | 23.5 | 0.129 | 59 | 1 |
| 6  | 194 | 78   | 29.34 | 153.74 | 23.5 | 0.129 | 59 | 1 |
| 8  | 112 | 72   | 29.34 | 153.74 | 23.6 | 0.84  | 58 | 0 |
| 8  | 112 | 72   | 29.34 | 153.74 | 23.6 | 0.84  | 58 | 0 |
| 8  | 112 | 72   | 29.34 | 153.74 | 23.6 | 0.84  | 58 | 0 |
| 12 | 106 | 80   | 29.34 | 153.74 | 23.6 | 0.137 | 44 | 0 |
| 12 | 106 | 80   | 29.34 | 153.74 | 23.6 | 0.137 | 44 | 0 |
| 1  | 100 | 66   | 15    | 56     | 23.6 | 0.666 | 26 | 0 |
| 1  | 100 | 66   | 15    | 56     | 23.6 | 0.666 | 26 | 0 |
| 6  | 96  | 72.4 | 29.34 | 153.74 | 23.7 | 0.19  | 28 | 0 |
| 6  | 96  | 72.4 | 29.34 | 153.74 | 23.7 | 0.19  | 28 | 0 |
| 6  | 96  | 72.4 | 29.34 | 153.74 | 23.7 | 0.19  | 28 | 0 |
| 1  | 131 | 64   | 14    | 415    | 23.7 | 0.389 | 21 | 0 |
| 1  | 131 | 64   | 14    | 415    | 23.7 | 0.389 | 21 | 0 |

|    |     |    |       |        |      |       |    |   |
|----|-----|----|-------|--------|------|-------|----|---|
| 1  | 131 | 64 | 14    | 415    | 23.7 | 0.389 | 21 | 0 |
| 4  | 134 | 72 | 29.34 | 153.74 | 23.8 | 0.277 | 60 | 1 |
| 4  | 134 | 72 | 29.34 | 153.74 | 23.8 | 0.277 | 60 | 1 |
| 7  | 114 | 76 | 17    | 110    | 23.8 | 0.466 | 31 | 0 |
| 7  | 114 | 76 | 17    | 110    | 23.8 | 0.466 | 31 | 0 |
| 7  | 114 | 76 | 17    | 110    | 23.8 | 0.466 | 31 | 0 |
| 5  | 111 | 72 | 28    | 153.74 | 23.9 | 0.407 | 27 | 0 |
| 5  | 111 | 72 | 28    | 153.74 | 23.9 | 0.407 | 27 | 0 |
| 1  | 95  | 60 | 18    | 58     | 23.9 | 0.26  | 22 | 0 |
| 1  | 95  | 60 | 18    | 58     | 23.9 | 0.26  | 22 | 0 |
| 10 | 115 | 98 | 29.34 | 153.74 | 24   | 1.022 | 34 | 0 |
| 10 | 115 | 98 | 29.34 | 153.74 | 24   | 1.022 | 34 | 0 |
| 10 | 115 | 98 | 29.34 | 153.74 | 24   | 1.022 | 34 | 0 |
| 6  | 108 | 44 | 20    | 130    | 24   | 0.813 | 35 | 0 |
| 6  | 108 | 44 | 20    | 130    | 24   | 0.813 | 35 | 0 |
| 1  | 111 | 62 | 13    | 182    | 24   | 0.138 | 23 | 0 |
| 1  | 111 | 62 | 13    | 182    | 24   | 0.138 | 23 | 0 |
| 1  | 111 | 62 | 13    | 182    | 24   | 0.138 | 23 | 0 |
| 4  | 103 | 60 | 33    | 192    | 24   | 0.966 | 33 | 0 |
| 4  | 103 | 60 | 33    | 192    | 24   | 0.966 | 33 | 0 |
| 1  | 140 | 74 | 26    | 180    | 24.1 | 0.828 | 23 | 0 |
| 1  | 140 | 74 | 26    | 180    | 24.1 | 0.828 | 23 | 0 |
| 1  | 140 | 74 | 26    | 180    | 24.1 | 0.828 | 23 | 0 |
| 6  | 137 | 61 | 29.34 | 153.74 | 24.2 | 0.151 | 55 | 0 |
| 6  | 137 | 61 | 29.34 | 153.74 | 24.2 | 0.151 | 55 | 0 |
| 6  | 137 | 61 | 29.34 | 153.74 | 24.2 | 0.151 | 55 | 0 |
| 6  | 137 | 61 | 29.34 | 153.74 | 24.2 | 0.151 | 55 | 0 |
| 9  | 91  | 68 | 29.34 | 153.74 | 24.2 | 0.2   | 58 | 0 |
| 9  | 91  | 68 | 29.34 | 153.74 | 24.2 | 0.2   | 58 | 0 |
| 9  | 91  | 68 | 29.34 | 153.74 | 24.2 | 0.2   | 58 | 0 |
| 2  | 92  | 76 | 20    | 153.74 | 24.2 | 1.698 | 28 | 0 |
| 2  | 92  | 76 | 20    | 153.74 | 24.2 | 1.698 | 28 | 0 |
| 2  | 92  | 76 | 20    | 153.74 | 24.2 | 1.698 | 28 | 0 |
| 1  | 101 | 50 | 15    | 36     | 24.2 | 0.526 | 26 | 0 |
| 1  | 101 | 50 | 15    | 36     | 24.2 | 0.526 | 26 | 0 |
| 2  | 56  | 56 | 28    | 45     | 24.2 | 0.332 | 22 | 0 |
| 2  | 56  | 56 | 28    | 45     | 24.2 | 0.332 | 22 | 0 |
| 2  | 56  | 56 | 28    | 45     | 24.2 | 0.332 | 22 | 0 |
| 2  | 101 | 58 | 17    | 265    | 24.2 | 0.614 | 23 | 0 |
| 2  | 101 | 58 | 17    | 265    | 24.2 | 0.614 | 23 | 0 |
| 2  | 101 | 58 | 17    | 265    | 24.2 | 0.614 | 23 | 0 |
| 1  | 105 | 58 | 29.34 | 153.74 | 24.3 | 0.187 | 21 | 0 |
| 1  | 105 | 58 | 29.34 | 153.74 | 24.3 | 0.187 | 21 | 0 |
| 6  | 162 | 62 | 29.34 | 153.74 | 24.3 | 0.178 | 50 | 1 |
| 6  | 162 | 62 | 29.34 | 153.74 | 24.3 | 0.178 | 50 | 1 |
| 6  | 162 | 62 | 29.34 | 153.74 | 24.3 | 0.178 | 50 | 1 |
| 6  | 103 | 66 | 29.34 | 153.74 | 24.3 | 0.249 | 29 | 0 |
| 6  | 103 | 66 | 29.34 | 153.74 | 24.3 | 0.249 | 29 | 0 |
| 1  | 125 | 70 | 24    | 110    | 24.3 | 0.221 | 25 | 0 |
| 1  | 125 | 70 | 24    | 110    | 24.3 | 0.221 | 25 | 0 |
| 1  | 125 | 70 | 24    | 110    | 24.3 | 0.221 | 25 | 0 |

|   |        |      |       |        |      |       |    |   |
|---|--------|------|-------|--------|------|-------|----|---|
| 8 | 85     | 55   | 20    | 153.74 | 24.4 | 0.136 | 42 | 0 |
| 8 | 85     | 55   | 20    | 153.74 | 24.4 | 0.136 | 42 | 0 |
| 5 | 88     | 66   | 21    | 23     | 24.4 | 0.342 | 30 | 0 |
| 5 | 88     | 66   | 21    | 23     | 24.4 | 0.342 | 30 | 0 |
| 2 | 90     | 80   | 14    | 55     | 24.4 | 0.249 | 24 | 0 |
| 2 | 90     | 80   | 14    | 55     | 24.4 | 0.249 | 24 | 0 |
| 1 | 90     | 68   | 8     | 153.74 | 24.5 | 1.138 | 36 | 0 |
| 1 | 90     | 68   | 8     | 153.74 | 24.5 | 1.138 | 36 | 0 |
| 1 | 90     | 68   | 8     | 153.74 | 24.5 | 1.138 | 36 | 0 |
| 0 | 111    | 65   | 29.34 | 153.74 | 24.6 | 0.66  | 31 | 0 |
| 8 | 107    | 80   | 29.34 | 153.74 | 24.6 | 0.856 | 34 | 0 |
| 8 | 107    | 80   | 29.34 | 153.74 | 24.6 | 0.856 | 34 | 0 |
| 8 | 107    | 80   | 29.34 | 153.74 | 24.6 | 0.856 | 34 | 0 |
| 0 | 101    | 65   | 28    | 153.74 | 24.6 | 0.237 | 22 | 0 |
| 0 | 101    | 65   | 28    | 153.74 | 24.6 | 0.237 | 22 | 0 |
| 2 | 99     | 52   | 15    | 94     | 24.6 | 0.637 | 21 | 0 |
| 2 | 99     | 52   | 15    | 94     | 24.6 | 0.637 | 21 | 0 |
| 2 | 99     | 52   | 15    | 94     | 24.6 | 0.637 | 21 | 0 |
| 0 | 125    | 68   | 29.34 | 153.74 | 24.7 | 0.206 | 21 | 0 |
| 0 | 125    | 68   | 29.34 | 153.74 | 24.7 | 0.206 | 21 | 0 |
| 0 | 125    | 68   | 29.34 | 153.74 | 24.7 | 0.206 | 21 | 0 |
| 1 | 121.98 | 48   | 20    | 153.74 | 24.7 | 0.14  | 22 | 0 |
| 1 | 121.98 | 48   | 20    | 153.74 | 24.7 | 0.14  | 22 | 0 |
| 4 | 94     | 65   | 22    | 153.74 | 24.7 | 0.148 | 21 | 0 |
| 4 | 94     | 65   | 22    | 153.74 | 24.7 | 0.148 | 21 | 0 |
| 4 | 94     | 65   | 22    | 153.74 | 24.7 | 0.148 | 21 | 0 |
| 2 | 142    | 82   | 18    | 64     | 24.7 | 0.761 | 21 | 0 |
| 2 | 142    | 82   | 18    | 64     | 24.7 | 0.761 | 21 | 0 |
| 3 | 96     | 56   | 34    | 115    | 24.7 | 0.944 | 39 | 0 |
| 3 | 96     | 56   | 34    | 115    | 24.7 | 0.944 | 39 | 0 |
| 3 | 96     | 56   | 34    | 115    | 24.7 | 0.944 | 39 | 0 |
| 9 | 156    | 86   | 29.34 | 153.74 | 24.8 | 0.23  | 53 | 1 |
| 9 | 156    | 86   | 29.34 | 153.74 | 24.8 | 0.23  | 53 | 1 |
| 9 | 156    | 86   | 29.34 | 153.74 | 24.8 | 0.23  | 53 | 1 |
| 0 | 137    | 68   | 14    | 148    | 24.8 | 0.143 | 21 | 0 |
| 0 | 137    | 68   | 14    | 148    | 24.8 | 0.143 | 21 | 0 |
| 0 | 137    | 68   | 14    | 148    | 24.8 | 0.143 | 21 | 0 |
| 5 | 114    | 74   | 29.34 | 153.74 | 24.9 | 0.744 | 57 | 0 |
| 5 | 114    | 74   | 29.34 | 153.74 | 24.9 | 0.744 | 57 | 0 |
| 0 | 99     | 72.4 | 29.34 | 153.74 | 25   | 0.253 | 22 | 0 |
| 0 | 99     | 72.4 | 29.34 | 153.74 | 25   | 0.253 | 22 | 0 |
| 0 | 99     | 72.4 | 29.34 | 153.74 | 25   | 0.253 | 22 | 0 |
| 5 | 44     | 62   | 29.34 | 153.74 | 25   | 0.587 | 36 | 0 |
| 5 | 44     | 62   | 29.34 | 153.74 | 25   | 0.587 | 36 | 0 |
| 8 | 120    | 78   | 29.34 | 153.74 | 25   | 0.409 | 64 | 0 |
| 8 | 120    | 78   | 29.34 | 153.74 | 25   | 0.409 | 64 | 0 |
| 8 | 120    | 78   | 29.34 | 153.74 | 25   | 0.409 | 64 | 0 |
| 2 | 112    | 66   | 22    | 153.74 | 25   | 0.307 | 24 | 0 |
| 2 | 112    | 66   | 22    | 153.74 | 25   | 0.307 | 24 | 0 |
| 6 | 109    | 60   | 27    | 153.74 | 25   | 0.206 | 27 | 0 |
| 6 | 109    | 60   | 27    | 153.74 | 25   | 0.206 | 27 | 0 |

|    |     |      |       |        |      |       |    |   |
|----|-----|------|-------|--------|------|-------|----|---|
| 2  | 68  | 70   | 32    | 66     | 25   | 0.187 | 25 | 0 |
| 0  | 102 | 52   | 29.34 | 153.74 | 25.1 | 0.078 | 21 | 0 |
| 0  | 102 | 52   | 29.34 | 153.74 | 25.1 | 0.078 | 21 | 0 |
| 1  | 90  | 62   | 18    | 59     | 25.1 | 1.268 | 25 | 0 |
| 1  | 90  | 62   | 18    | 59     | 25.1 | 1.268 | 25 | 0 |
| 1  | 90  | 62   | 18    | 59     | 25.1 | 1.268 | 25 | 0 |
| 7  | 195 | 70   | 33    | 145    | 25.1 | 0.163 | 55 | 1 |
| 7  | 195 | 70   | 33    | 145    | 25.1 | 0.163 | 55 | 1 |
| 7  | 195 | 70   | 33    | 145    | 25.1 | 0.163 | 55 | 1 |
| 7  | 195 | 70   | 33    | 145    | 25.1 | 0.163 | 55 | 1 |
| 7  | 195 | 70   | 33    | 145    | 25.1 | 0.163 | 55 | 1 |
| 7  | 119 | 72.4 | 29.34 | 153.74 | 25.2 | 0.209 | 37 | 0 |
| 7  | 119 | 72.4 | 29.34 | 153.74 | 25.2 | 0.209 | 37 | 0 |
| 2  | 108 | 62   | 32    | 56     | 25.2 | 0.128 | 21 | 0 |
| 2  | 108 | 62   | 32    | 56     | 25.2 | 0.128 | 21 | 0 |
| 2  | 117 | 90   | 19    | 71     | 25.2 | 0.313 | 21 | 0 |
| 2  | 117 | 90   | 19    | 71     | 25.2 | 0.313 | 21 | 0 |
| 2  | 117 | 90   | 19    | 71     | 25.2 | 0.313 | 21 | 0 |
| 0  | 98  | 82   | 15    | 84     | 25.2 | 0.299 | 22 | 0 |
| 0  | 98  | 82   | 15    | 84     | 25.2 | 0.299 | 22 | 0 |
| 0  | 98  | 82   | 15    | 84     | 25.2 | 0.299 | 22 | 0 |
| 1  | 91  | 54   | 25    | 100    | 25.2 | 0.234 | 23 | 0 |
| 1  | 91  | 54   | 25    | 100    | 25.2 | 0.234 | 23 | 0 |
| 1  | 91  | 54   | 25    | 100    | 25.2 | 0.234 | 23 | 0 |
| 1  | 109 | 56   | 21    | 135    | 25.2 | 0.833 | 23 | 0 |
| 1  | 109 | 56   | 21    | 135    | 25.2 | 0.833 | 23 | 0 |
| 1  | 109 | 56   | 21    | 135    | 25.2 | 0.833 | 23 | 0 |
| 1  | 100 | 72   | 12    | 70     | 25.3 | 0.658 | 28 | 0 |
| 1  | 100 | 72   | 12    | 70     | 25.3 | 0.658 | 28 | 0 |
| 1  | 100 | 72   | 12    | 70     | 25.3 | 0.658 | 28 | 0 |
| 2  | 108 | 62   | 10    | 278    | 25.3 | 0.881 | 22 | 0 |
| 2  | 108 | 62   | 10    | 278    | 25.3 | 0.881 | 22 | 0 |
| 1  | 99  | 58   | 10    | 153.74 | 25.4 | 0.551 | 21 | 0 |
| 1  | 99  | 58   | 10    | 153.74 | 25.4 | 0.551 | 21 | 0 |
| 1  | 99  | 58   | 10    | 153.74 | 25.4 | 0.551 | 21 | 0 |
| 1  | 79  | 80   | 25    | 37     | 25.4 | 0.583 | 22 | 0 |
| 1  | 79  | 80   | 25    | 37     | 25.4 | 0.583 | 22 | 0 |
| 2  | 141 | 58   | 34    | 128    | 25.4 | 0.699 | 24 | 0 |
| 2  | 141 | 58   | 34    | 128    | 25.4 | 0.699 | 24 | 0 |
| 1  | 109 | 60   | 8     | 182    | 25.4 | 0.947 | 21 | 0 |
| 1  | 109 | 60   | 8     | 182    | 25.4 | 0.947 | 21 | 0 |
| 1  | 109 | 60   | 8     | 182    | 25.4 | 0.947 | 21 | 0 |
| 10 | 161 | 68   | 23    | 132    | 25.5 | 0.326 | 47 | 1 |
| 10 | 161 | 68   | 23    | 132    | 25.5 | 0.326 | 47 | 1 |
| 10 | 161 | 68   | 23    | 132    | 25.5 | 0.326 | 47 | 1 |
| 7  | 124 | 70   | 33    | 215    | 25.5 | 0.161 | 37 | 0 |
| 7  | 124 | 70   | 33    | 215    | 25.5 | 0.161 | 37 | 0 |
| 3  | 139 | 54   | 29.34 | 153.74 | 25.6 | 0.402 | 22 | 1 |
| 3  | 139 | 54   | 29.34 | 153.74 | 25.6 | 0.402 | 22 | 1 |
| 2  | 139 | 75   | 29.34 | 153.74 | 25.6 | 0.167 | 29 | 0 |
| 2  | 139 | 75   | 29.34 | 153.74 | 25.6 | 0.167 | 29 | 0 |

|    |     |    |       |        |      |       |    |   |
|----|-----|----|-------|--------|------|-------|----|---|
| 2  | 139 | 75 | 29.34 | 153.74 | 25.6 | 0.167 | 29 | 0 |
| 4  | 99  | 72 | 17    | 153.74 | 25.6 | 0.294 | 28 | 0 |
| 4  | 99  | 72 | 17    | 153.74 | 25.6 | 0.294 | 28 | 0 |
| 4  | 99  | 72 | 17    | 153.74 | 25.6 | 0.294 | 28 | 0 |
| 4  | 99  | 72 | 17    | 153.74 | 25.6 | 0.294 | 28 | 0 |
| 4  | 99  | 72 | 17    | 153.74 | 25.6 | 0.294 | 28 | 0 |
| 3  | 99  | 54 | 19    | 86     | 25.6 | 0.154 | 24 | 0 |
| 3  | 99  | 54 | 19    | 86     | 25.6 | 0.154 | 24 | 0 |
| 3  | 99  | 54 | 19    | 86     | 25.6 | 0.154 | 24 | 0 |
| 1  | 157 | 72 | 21    | 168    | 25.6 | 0.123 | 24 | 0 |
| 1  | 157 | 72 | 21    | 168    | 25.6 | 0.123 | 24 | 0 |
| 1  | 157 | 72 | 21    | 168    | 25.6 | 0.123 | 24 | 0 |
| 3  | 106 | 72 | 29.34 | 153.74 | 25.8 | 0.207 | 27 | 0 |
| 3  | 106 | 72 | 29.34 | 153.74 | 25.8 | 0.207 | 27 | 0 |
| 3  | 106 | 72 | 29.34 | 153.74 | 25.8 | 0.207 | 27 | 0 |
| 10 | 92  | 62 | 29.34 | 153.74 | 25.9 | 0.167 | 31 | 0 |
| 10 | 92  | 62 | 29.34 | 153.74 | 25.9 | 0.167 | 31 | 0 |
| 10 | 92  | 62 | 29.34 | 153.74 | 25.9 | 0.167 | 31 | 0 |
| 8  | 197 | 74 | 29.34 | 153.74 | 25.9 | 1.191 | 39 | 1 |
| 8  | 197 | 74 | 29.34 | 153.74 | 25.9 | 1.191 | 39 | 1 |
| 8  | 197 | 74 | 29.34 | 153.74 | 25.9 | 1.191 | 39 | 1 |
| 8  | 197 | 74 | 29.34 | 153.74 | 25.9 | 1.191 | 39 | 1 |
| 9  | 134 | 74 | 33    | 60     | 25.9 | 0.46  | 81 | 0 |
| 9  | 134 | 74 | 33    | 60     | 25.9 | 0.46  | 81 | 0 |
| 9  | 134 | 74 | 33    | 60     | 25.9 | 0.46  | 81 | 0 |
| 1  | 95  | 74 | 21    | 73     | 25.9 | 0.673 | 36 | 0 |
| 1  | 95  | 74 | 21    | 73     | 25.9 | 0.673 | 36 | 0 |
| 1  | 95  | 74 | 21    | 73     | 25.9 | 0.673 | 36 | 0 |
| 8  | 126 | 74 | 38    | 75     | 25.9 | 0.162 | 39 | 0 |
| 8  | 126 | 74 | 38    | 75     | 25.9 | 0.162 | 39 | 0 |
| 8  | 126 | 74 | 38    | 75     | 25.9 | 0.162 | 39 | 0 |
| 1  | 130 | 70 | 13    | 105    | 25.9 | 0.472 | 22 | 0 |
| 1  | 130 | 70 | 13    | 105    | 25.9 | 0.472 | 22 | 0 |
| 1  | 130 | 70 | 13    | 105    | 25.9 | 0.472 | 22 | 0 |
| 1  | 193 | 50 | 16    | 375    | 25.9 | 0.655 | 24 | 0 |
| 1  | 193 | 50 | 16    | 375    | 25.9 | 0.655 | 24 | 0 |
| 5  | 110 | 68 | 29.34 | 153.74 | 26   | 0.292 | 30 | 0 |
| 5  | 110 | 68 | 29.34 | 153.74 | 26   | 0.292 | 30 | 0 |
| 5  | 110 | 68 | 29.34 | 153.74 | 26   | 0.292 | 30 | 0 |
| 5  | 110 | 68 | 29.34 | 153.74 | 26   | 0.292 | 30 | 0 |
| 5  | 110 | 68 | 29.34 | 153.74 | 26   | 0.292 | 30 | 0 |
| 3  | 108 | 62 | 24    | 153.74 | 26   | 0.223 | 25 | 0 |
| 3  | 108 | 62 | 24    | 153.74 | 26   | 0.223 | 25 | 0 |
| 3  | 108 | 62 | 24    | 153.74 | 26   | 0.223 | 25 | 0 |
| 2  | 94  | 68 | 18    | 76     | 26   | 0.561 | 21 | 0 |
| 2  | 94  | 68 | 18    | 76     | 26   | 0.561 | 21 | 0 |
| 2  | 94  | 68 | 18    | 76     | 26   | 0.561 | 21 | 0 |
| 2  | 94  | 68 | 18    | 76     | 26   | 0.561 | 21 | 0 |
| 7  | 136 | 74 | 26    | 135    | 26   | 0.647 | 51 | 0 |
| 7  | 136 | 74 | 26    | 135    | 26   | 0.647 | 51 | 0 |
| 1  | 151 | 60 | 29.34 | 153.74 | 26.1 | 0.179 | 22 | 0 |



|    |     |    |       |        |      |       |    |   |
|----|-----|----|-------|--------|------|-------|----|---|
| 1  | 151 | 60 | 29.34 | 153.74 | 26.1 | 0.179 | 22 | 0 |
| 1  | 151 | 60 | 29.34 | 153.74 | 26.1 | 0.179 | 22 | 0 |
| 8  | 194 | 80 | 29.34 | 153.74 | 26.1 | 0.551 | 67 | 0 |
| 8  | 194 | 80 | 29.34 | 153.74 | 26.1 | 0.551 | 67 | 0 |
| 8  | 194 | 80 | 29.34 | 153.74 | 26.1 | 0.551 | 67 | 0 |
| 8  | 194 | 80 | 29.34 | 153.74 | 26.1 | 0.551 | 67 | 0 |
| 8  | 194 | 80 | 29.34 | 153.74 | 26.1 | 0.551 | 67 | 0 |
| 2  | 95  | 54 | 14    | 88     | 26.1 | 0.748 | 22 | 0 |
| 2  | 95  | 54 | 14    | 88     | 26.1 | 0.748 | 22 | 0 |
| 2  | 111 | 60 | 29.34 | 153.74 | 26.2 | 0.343 | 23 | 0 |
| 2  | 111 | 60 | 29.34 | 153.74 | 26.2 | 0.343 | 23 | 0 |
| 2  | 111 | 60 | 29.34 | 153.74 | 26.2 | 0.343 | 23 | 0 |
| 6  | 80  | 66 | 30    | 153.74 | 26.2 | 0.313 | 41 | 0 |
| 6  | 80  | 66 | 30    | 153.74 | 26.2 | 0.313 | 41 | 0 |
| 6  | 80  | 66 | 30    | 153.74 | 26.2 | 0.313 | 41 | 0 |
| 1  | 143 | 74 | 22    | 61     | 26.2 | 0.256 | 21 | 0 |
| 1  | 143 | 74 | 22    | 61     | 26.2 | 0.256 | 21 | 0 |
| 1  | 143 | 74 | 22    | 61     | 26.2 | 0.256 | 21 | 0 |
| 1  | 143 | 74 | 22    | 61     | 26.2 | 0.256 | 21 | 0 |
| 5  | 121 | 72 | 23    | 112    | 26.2 | 0.245 | 30 | 0 |
| 5  | 121 | 72 | 23    | 112    | 26.2 | 0.245 | 30 | 0 |
| 5  | 121 | 72 | 23    | 112    | 26.2 | 0.245 | 30 | 0 |
| 3  | 116 | 74 | 15    | 105    | 26.3 | 0.107 | 24 | 0 |
| 0  | 107 | 60 | 25    | 153.74 | 26.4 | 0.133 | 23 | 0 |
| 0  | 107 | 60 | 25    | 153.74 | 26.4 | 0.133 | 23 | 0 |
| 0  | 107 | 60 | 25    | 153.74 | 26.4 | 0.133 | 23 | 0 |
| 3  | 129 | 64 | 29    | 115    | 26.4 | 0.219 | 28 | 1 |
| 3  | 129 | 64 | 29    | 115    | 26.4 | 0.219 | 28 | 1 |
| 3  | 129 | 64 | 29    | 115    | 26.4 | 0.219 | 28 | 1 |
| 3  | 129 | 64 | 29    | 115    | 26.4 | 0.219 | 28 | 1 |
| 0  | 134 | 58 | 20    | 291    | 26.4 | 0.352 | 21 | 0 |
| 0  | 134 | 58 | 20    | 291    | 26.4 | 0.352 | 21 | 0 |
| 0  | 134 | 58 | 20    | 291    | 26.4 | 0.352 | 21 | 0 |
| 12 | 121 | 78 | 17    | 153.74 | 26.5 | 0.259 | 62 | 0 |
| 12 | 121 | 78 | 17    | 153.74 | 26.5 | 0.259 | 62 | 0 |
| 1  | 107 | 68 | 19    | 153.74 | 26.5 | 0.165 | 24 | 0 |
| 1  | 107 | 68 | 19    | 153.74 | 26.5 | 0.165 | 24 | 0 |
| 7  | 106 | 60 | 24    | 153.74 | 26.5 | 0.296 | 29 | 1 |
| 7  | 106 | 60 | 24    | 153.74 | 26.5 | 0.296 | 29 | 1 |
| 6  | 166 | 74 | 29.34 | 153.74 | 26.6 | 0.304 | 66 | 0 |
| 6  | 166 | 74 | 29.34 | 153.74 | 26.6 | 0.304 | 66 | 0 |
| 6  | 166 | 74 | 29.34 | 153.74 | 26.6 | 0.304 | 66 | 0 |
| 6  | 166 | 74 | 29.34 | 153.74 | 26.6 | 0.304 | 66 | 0 |
| 6  | 166 | 74 | 29.34 | 153.74 | 26.6 | 0.304 | 66 | 0 |
| 1  | 81  | 72 | 18    | 40     | 26.6 | 0.283 | 24 | 0 |
| 1  | 81  | 72 | 18    | 40     | 26.6 | 0.283 | 24 | 0 |
| 1  | 81  | 72 | 18    | 40     | 26.6 | 0.283 | 24 | 0 |
| 2  | 155 | 74 | 17    | 96     | 26.6 | 0.433 | 27 | 1 |
| 2  | 155 | 74 | 17    | 96     | 26.6 | 0.433 | 27 | 1 |
| 2  | 155 | 74 | 17    | 96     | 26.6 | 0.433 | 27 | 1 |
| 1  | 135 | 54 | 29.34 | 153.74 | 26.7 | 0.687 | 62 | 0 |

|    |     |    |       |        |      |       |    |   |
|----|-----|----|-------|--------|------|-------|----|---|
| 1  | 135 | 54 | 29.34 | 153.74 | 26.7 | 0.687 | 62 | 0 |
| 1  | 135 | 54 | 29.34 | 153.74 | 26.7 | 0.687 | 62 | 0 |
| 2  | 120 | 54 | 29.34 | 153.74 | 26.8 | 0.455 | 27 | 0 |
| 2  | 120 | 54 | 29.34 | 153.74 | 26.8 | 0.455 | 27 | 0 |
| 2  | 120 | 54 | 29.34 | 153.74 | 26.8 | 0.455 | 27 | 0 |
| 5  | 73  | 60 | 29.34 | 153.74 | 26.8 | 0.268 | 27 | 0 |
| 5  | 73  | 60 | 29.34 | 153.74 | 26.8 | 0.268 | 27 | 0 |
| 5  | 132 | 80 | 29.34 | 153.74 | 26.8 | 0.186 | 69 | 0 |
| 5  | 132 | 80 | 29.34 | 153.74 | 26.8 | 0.186 | 69 | 0 |
| 5  | 132 | 80 | 29.34 | 153.74 | 26.8 | 0.186 | 69 | 0 |
| 13 | 152 | 90 | 33    | 29     | 26.8 | 0.731 | 43 | 1 |
| 13 | 152 | 90 | 33    | 29     | 26.8 | 0.731 | 43 | 1 |
| 13 | 152 | 90 | 33    | 29     | 26.8 | 0.731 | 43 | 1 |
| 6  | 99  | 60 | 19    | 54     | 26.9 | 0.497 | 32 | 0 |
| 6  | 99  | 60 | 19    | 54     | 26.9 | 0.497 | 32 | 0 |
| 10 | 133 | 68 | 29.34 | 153.74 | 27   | 0.245 | 36 | 0 |
| 10 | 133 | 68 | 29.34 | 153.74 | 27   | 0.245 | 36 | 0 |
| 2  | 108 | 80 | 29.34 | 153.74 | 27   | 0.259 | 52 | 1 |
| 2  | 108 | 80 | 29.34 | 153.74 | 27   | 0.259 | 52 | 1 |
| 1  | 108 | 88 | 19    | 153.74 | 27.1 | 0.4   | 24 | 0 |
| 1  | 108 | 88 | 19    | 153.74 | 27.1 | 0.4   | 24 | 0 |
| 1  | 108 | 88 | 19    | 153.74 | 27.1 | 0.4   | 24 | 0 |
| 6  | 119 | 50 | 22    | 176    | 27.1 | 1.318 | 33 | 1 |
| 6  | 119 | 50 | 22    | 176    | 27.1 | 1.318 | 33 | 1 |
| 1  | 97  | 68 | 21    | 153.74 | 27.2 | 1.095 | 22 | 0 |
| 1  | 97  | 68 | 21    | 153.74 | 27.2 | 1.095 | 22 | 0 |
| 1  | 97  | 68 | 21    | 153.74 | 27.2 | 1.095 | 22 | 0 |
| 1  | 97  | 68 | 21    | 153.74 | 27.2 | 1.095 | 22 | 0 |
| 1  | 90  | 62 | 12    | 43     | 27.2 | 0.58  | 24 | 0 |
| 1  | 90  | 62 | 12    | 43     | 27.2 | 0.58  | 24 | 0 |
| 1  | 90  | 62 | 12    | 43     | 27.2 | 0.58  | 24 | 0 |
| 2  | 91  | 62 | 29.34 | 153.74 | 27.3 | 0.525 | 22 | 0 |
| 2  | 91  | 62 | 29.34 | 153.74 | 27.3 | 0.525 | 22 | 0 |
| 2  | 91  | 62 | 29.34 | 153.74 | 27.3 | 0.525 | 22 | 0 |
| 2  | 90  | 70 | 17    | 153.74 | 27.3 | 0.085 | 22 | 0 |
| 2  | 90  | 70 | 17    | 153.74 | 27.3 | 0.085 | 22 | 0 |
| 2  | 90  | 70 | 17    | 153.74 | 27.3 | 0.085 | 22 | 0 |
| 0  | 108 | 68 | 20    | 153.74 | 27.3 | 0.787 | 32 | 0 |
| 0  | 108 | 68 | 20    | 153.74 | 27.3 | 0.787 | 32 | 0 |
| 0  | 137 | 84 | 27    | 153.74 | 27.3 | 0.231 | 59 | 0 |
| 0  | 137 | 84 | 27    | 153.74 | 27.3 | 0.231 | 59 | 0 |
| 0  | 137 | 84 | 27    | 153.74 | 27.3 | 0.231 | 59 | 0 |
| 7  | 114 | 64 | 29.34 | 153.74 | 27.4 | 0.732 | 34 | 1 |
| 7  | 114 | 64 | 29.34 | 153.74 | 27.4 | 0.732 | 34 | 1 |
| 7  | 114 | 64 | 29.34 | 153.74 | 27.4 | 0.732 | 34 | 1 |
| 7  | 159 | 64 | 29.34 | 153.74 | 27.4 | 0.294 | 40 | 0 |
| 7  | 159 | 64 | 29.34 | 153.74 | 27.4 | 0.294 | 40 | 0 |
| 0  | 124 | 70 | 20    | 153.74 | 27.4 | 0.254 | 36 | 1 |
| 0  | 124 | 70 | 20    | 153.74 | 27.4 | 0.254 | 36 | 1 |
| 0  | 124 | 70 | 20    | 153.74 | 27.4 | 0.254 | 36 | 1 |
| 1  | 116 | 70 | 28    | 153.74 | 27.4 | 0.204 | 21 | 0 |

|    |        |      |       |        |      |       |    |   |
|----|--------|------|-------|--------|------|-------|----|---|
| 1  | 116    | 70   | 28    | 153.74 | 27.4 | 0.204 | 21 | 0 |
| 0  | 126    | 86   | 27    | 120    | 27.4 | 0.515 | 21 | 0 |
| 0  | 126    | 86   | 27    | 120    | 27.4 | 0.515 | 21 | 0 |
| 0  | 126    | 86   | 27    | 120    | 27.4 | 0.515 | 21 | 0 |
| 2  | 146    | 72.4 | 29.34 | 153.74 | 27.5 | 0.24  | 28 | 1 |
| 2  | 146    | 72.4 | 29.34 | 153.74 | 27.5 | 0.24  | 28 | 1 |
| 10 | 111    | 70   | 27    | 153.74 | 27.5 | 0.141 | 40 | 1 |
| 10 | 111    | 70   | 27    | 153.74 | 27.5 | 0.141 | 40 | 1 |
| 10 | 111    | 70   | 27    | 153.74 | 27.5 | 0.141 | 40 | 1 |
| 3  | 81     | 86   | 16    | 66     | 27.5 | 0.306 | 22 | 0 |
| 3  | 81     | 86   | 16    | 66     | 27.5 | 0.306 | 22 | 0 |
| 3  | 81     | 86   | 16    | 66     | 27.5 | 0.306 | 22 | 0 |
| 1  | 128    | 82   | 17    | 183    | 27.5 | 0.115 | 22 | 0 |
| 1  | 128    | 82   | 17    | 183    | 27.5 | 0.115 | 22 | 0 |
| 1  | 128    | 82   | 17    | 183    | 27.5 | 0.115 | 22 | 0 |
| 4  | 129    | 60   | 12    | 231    | 27.5 | 0.527 | 31 | 0 |
| 4  | 129    | 60   | 12    | 231    | 27.5 | 0.527 | 31 | 0 |
| 4  | 129    | 60   | 12    | 231    | 27.5 | 0.527 | 31 | 0 |
| 6  | 124    | 72   | 29.34 | 153.74 | 27.6 | 0.368 | 29 | 1 |
| 6  | 124    | 72   | 29.34 | 153.74 | 27.6 | 0.368 | 29 | 1 |
| 6  | 124    | 72   | 29.34 | 153.74 | 27.6 | 0.368 | 29 | 1 |
| 4  | 141    | 74   | 29.34 | 153.74 | 27.6 | 0.244 | 40 | 0 |
| 4  | 141    | 74   | 29.34 | 153.74 | 27.6 | 0.244 | 40 | 0 |
| 5  | 88     | 78   | 30    | 153.74 | 27.6 | 0.258 | 37 | 0 |
| 5  | 88     | 78   | 30    | 153.74 | 27.6 | 0.258 | 37 | 0 |
| 5  | 88     | 78   | 30    | 153.74 | 27.6 | 0.258 | 37 | 0 |
| 10 | 122    | 78   | 31    | 153.74 | 27.6 | 0.512 | 45 | 0 |
| 10 | 122    | 78   | 31    | 153.74 | 27.6 | 0.512 | 45 | 0 |
| 6  | 125    | 78   | 31    | 153.74 | 27.6 | 0.565 | 49 | 1 |
| 6  | 125    | 78   | 31    | 153.74 | 27.6 | 0.565 | 49 | 1 |
| 6  | 125    | 78   | 31    | 153.74 | 27.6 | 0.565 | 49 | 1 |
| 3  | 103    | 72   | 30    | 152    | 27.6 | 0.73  | 27 | 0 |
| 3  | 103    | 72   | 30    | 152    | 27.6 | 0.73  | 27 | 0 |
| 3  | 103    | 72   | 30    | 152    | 27.6 | 0.73  | 27 | 0 |
| 12 | 92     | 62   | 7     | 258    | 27.6 | 0.926 | 44 | 1 |
| 12 | 92     | 62   | 7     | 258    | 27.6 | 0.926 | 44 | 1 |
| 10 | 162    | 84   | 29.34 | 153.74 | 27.7 | 0.182 | 54 | 0 |
| 10 | 162    | 84   | 29.34 | 153.74 | 27.7 | 0.182 | 54 | 0 |
| 10 | 162    | 84   | 29.34 | 153.74 | 27.7 | 0.182 | 54 | 0 |
| 2  | 81     | 60   | 22    | 153.74 | 27.7 | 0.29  | 25 | 0 |
| 2  | 81     | 60   | 22    | 153.74 | 27.7 | 0.29  | 25 | 0 |
| 1  | 121.98 | 74   | 20    | 23     | 27.7 | 0.299 | 21 | 0 |
| 1  | 121.98 | 74   | 20    | 23     | 27.7 | 0.299 | 21 | 0 |
| 2  | 127    | 58   | 24    | 275    | 27.7 | 1.6   | 25 | 0 |
| 2  | 127    | 58   | 24    | 275    | 27.7 | 1.6   | 25 | 0 |
| 2  | 127    | 58   | 24    | 275    | 27.7 | 1.6   | 25 | 0 |
| 8  | 110    | 76   | 29.34 | 153.74 | 27.8 | 0.237 | 58 | 0 |
| 8  | 110    | 76   | 29.34 | 153.74 | 27.8 | 0.237 | 58 | 0 |
| 6  | 114    | 88   | 29.34 | 153.74 | 27.8 | 0.247 | 66 | 0 |
| 6  | 114    | 88   | 29.34 | 153.74 | 27.8 | 0.247 | 66 | 0 |
| 1  | 124    | 74   | 36    | 153.74 | 27.8 | 0.1   | 30 | 0 |

|    |     |      |       |        |      |       |    |   |
|----|-----|------|-------|--------|------|-------|----|---|
| 1  | 124 | 74   | 36    | 153.74 | 27.8 | 0.1   | 30 | 0 |
| 1  | 124 | 74   | 36    | 153.74 | 27.8 | 0.1   | 30 | 0 |
| 1  | 89  | 24   | 19    | 25     | 27.8 | 0.559 | 21 | 0 |
| 1  | 89  | 24   | 19    | 25     | 27.8 | 0.559 | 21 | 0 |
| 0  | 74  | 52   | 10    | 36     | 27.8 | 0.269 | 22 | 0 |
| 0  | 74  | 52   | 10    | 36     | 27.8 | 0.269 | 22 | 0 |
| 0  | 74  | 52   | 10    | 36     | 27.8 | 0.269 | 22 | 0 |
| 4  | 85  | 58   | 22    | 49     | 27.8 | 0.306 | 28 | 0 |
| 4  | 85  | 58   | 22    | 49     | 27.8 | 0.306 | 28 | 0 |
| 4  | 85  | 58   | 22    | 49     | 27.8 | 0.306 | 28 | 0 |
| 0  | 104 | 64   | 23    | 116    | 27.8 | 0.454 | 23 | 0 |
| 0  | 104 | 64   | 23    | 116    | 27.8 | 0.454 | 23 | 0 |
| 0  | 105 | 84   | 29.34 | 153.74 | 27.9 | 0.741 | 62 | 1 |
| 0  | 105 | 84   | 29.34 | 153.74 | 27.9 | 0.741 | 62 | 1 |
| 0  | 105 | 84   | 29.34 | 153.74 | 27.9 | 0.741 | 62 | 1 |
| 8  | 109 | 76   | 39    | 114    | 27.9 | 0.64  | 31 | 1 |
| 8  | 109 | 76   | 39    | 114    | 27.9 | 0.64  | 31 | 1 |
| 4  | 90  | 72.4 | 29.34 | 153.74 | 28   | 0.61  | 31 | 0 |
| 4  | 90  | 72.4 | 29.34 | 153.74 | 28   | 0.61  | 31 | 0 |
| 4  | 90  | 72.4 | 29.34 | 153.74 | 28   | 0.61  | 31 | 0 |
| 2  | 129 | 84   | 29.34 | 153.74 | 28   | 0.284 | 27 | 0 |
| 2  | 129 | 84   | 29.34 | 153.74 | 28   | 0.284 | 27 | 0 |
| 2  | 71  | 70   | 27    | 153.74 | 28   | 0.586 | 22 | 0 |
| 2  | 71  | 70   | 27    | 153.74 | 28   | 0.586 | 22 | 0 |
| 4  | 132 | 86   | 31    | 153.74 | 28   | 0.419 | 63 | 0 |
| 4  | 132 | 86   | 31    | 153.74 | 28   | 0.419 | 63 | 0 |
| 4  | 132 | 86   | 31    | 153.74 | 28   | 0.419 | 63 | 0 |
| 2  | 146 | 70   | 38    | 360    | 28   | 0.337 | 29 | 1 |
| 2  | 146 | 70   | 38    | 360    | 28   | 0.337 | 29 | 1 |
| 4  | 97  | 60   | 23    | 153.74 | 28.2 | 0.443 | 22 | 0 |
| 4  | 97  | 60   | 23    | 153.74 | 28.2 | 0.443 | 22 | 0 |
| 4  | 97  | 60   | 23    | 153.74 | 28.2 | 0.443 | 22 | 0 |
| 9  | 112 | 82   | 24    | 153.74 | 28.2 | 1.282 | 50 | 1 |
| 9  | 112 | 82   | 24    | 153.74 | 28.2 | 1.282 | 50 | 1 |
| 9  | 112 | 82   | 24    | 153.74 | 28.2 | 1.282 | 50 | 1 |
| 1  | 107 | 50   | 19    | 153.74 | 28.3 | 0.181 | 29 | 0 |
| 1  | 107 | 50   | 19    | 153.74 | 28.3 | 0.181 | 29 | 0 |
| 1  | 107 | 50   | 19    | 153.74 | 28.3 | 0.181 | 29 | 0 |
| 11 | 136 | 84   | 35    | 130    | 28.3 | 0.26  | 42 | 1 |
| 11 | 136 | 84   | 35    | 130    | 28.3 | 0.26  | 42 | 1 |
| 11 | 136 | 84   | 35    | 130    | 28.3 | 0.26  | 42 | 1 |
| 4  | 183 | 72.4 | 29.34 | 153.74 | 28.4 | 0.212 | 36 | 1 |
| 4  | 183 | 72.4 | 29.34 | 153.74 | 28.4 | 0.212 | 36 | 1 |
| 4  | 183 | 72.4 | 29.34 | 153.74 | 28.4 | 0.212 | 36 | 1 |
| 8  | 120 | 86   | 29.34 | 153.74 | 28.4 | 0.259 | 22 | 1 |
| 8  | 120 | 86   | 29.34 | 153.74 | 28.4 | 0.259 | 22 | 1 |
| 8  | 120 | 86   | 29.34 | 153.74 | 28.4 | 0.259 | 22 | 1 |
| 2  | 88  | 58   | 26    | 16     | 28.4 | 0.766 | 22 | 0 |
| 2  | 88  | 58   | 26    | 16     | 28.4 | 0.766 | 22 | 0 |
| 2  | 88  | 58   | 26    | 16     | 28.4 | 0.766 | 22 | 0 |
| 3  | 111 | 90   | 12    | 78     | 28.4 | 0.495 | 29 | 0 |

|   |     |     |       |        |      |       |    |   |
|---|-----|-----|-------|--------|------|-------|----|---|
| 3 | 111 | 90  | 12    | 78     | 28.4 | 0.495 | 29 | 0 |
| 3 | 111 | 90  | 12    | 78     | 28.4 | 0.495 | 29 | 0 |
| 3 | 130 | 78  | 23    | 79     | 28.4 | 0.323 | 34 | 1 |
| 3 | 130 | 78  | 23    | 79     | 28.4 | 0.323 | 34 | 1 |
| 3 | 130 | 78  | 23    | 79     | 28.4 | 0.323 | 34 | 1 |
| 4 | 110 | 76  | 20    | 100    | 28.4 | 0.118 | 27 | 0 |
| 4 | 110 | 76  | 20    | 100    | 28.4 | 0.118 | 27 | 0 |
| 4 | 110 | 76  | 20    | 100    | 28.4 | 0.118 | 27 | 0 |
| 4 | 189 | 110 | 31    | 153.74 | 28.5 | 0.68  | 37 | 0 |
| 4 | 189 | 110 | 31    | 153.74 | 28.5 | 0.68  | 37 | 0 |
| 2 | 82  | 52  | 22    | 115    | 28.5 | 1.699 | 25 | 0 |
| 2 | 82  | 52  | 22    | 115    | 28.5 | 1.699 | 25 | 0 |
| 1 | 109 | 58  | 18    | 116    | 28.5 | 0.219 | 22 | 0 |
| 1 | 109 | 58  | 18    | 116    | 28.5 | 0.219 | 22 | 0 |
| 1 | 109 | 58  | 18    | 116    | 28.5 | 0.219 | 22 | 0 |
| 5 | 139 | 64  | 35    | 140    | 28.6 | 0.411 | 26 | 0 |
| 5 | 139 | 64  | 35    | 140    | 28.6 | 0.411 | 26 | 0 |
| 1 | 130 | 60  | 23    | 170    | 28.6 | 0.692 | 21 | 0 |
| 1 | 130 | 60  | 23    | 170    | 28.6 | 0.692 | 21 | 0 |
| 1 | 130 | 60  | 23    | 170    | 28.6 | 0.692 | 21 | 0 |
| 6 | 117 | 96  | 29.34 | 153.74 | 28.7 | 0.157 | 30 | 0 |
| 6 | 117 | 96  | 29.34 | 153.74 | 28.7 | 0.157 | 30 | 0 |
| 6 | 117 | 96  | 29.34 | 153.74 | 28.7 | 0.157 | 30 | 0 |
| 2 | 114 | 68  | 22    | 153.74 | 28.7 | 0.092 | 25 | 0 |
| 2 | 114 | 68  | 22    | 153.74 | 28.7 | 0.092 | 25 | 0 |
| 6 | 93  | 50  | 30    | 64     | 28.7 | 0.356 | 23 | 0 |
| 6 | 93  | 50  | 30    | 64     | 28.7 | 0.356 | 23 | 0 |
| 6 | 93  | 50  | 30    | 64     | 28.7 | 0.356 | 23 | 0 |
| 1 | 139 | 46  | 19    | 83     | 28.7 | 0.654 | 22 | 0 |
| 1 | 139 | 46  | 19    | 83     | 28.7 | 0.654 | 22 | 0 |
| 1 | 139 | 46  | 19    | 83     | 28.7 | 0.654 | 22 | 0 |
| 0 | 93  | 60  | 25    | 92     | 28.7 | 0.532 | 22 | 0 |
| 0 | 93  | 60  | 25    | 92     | 28.7 | 0.532 | 22 | 0 |
| 0 | 93  | 60  | 25    | 92     | 28.7 | 0.532 | 22 | 0 |
| 1 | 126 | 56  | 29    | 152    | 28.7 | 0.801 | 21 | 0 |
| 1 | 126 | 56  | 29    | 152    | 28.7 | 0.801 | 21 | 0 |
| 1 | 126 | 56  | 29    | 152    | 28.7 | 0.801 | 21 | 0 |
| 8 | 124 | 76  | 24    | 600    | 28.7 | 0.687 | 52 | 1 |
| 8 | 124 | 76  | 24    | 600    | 28.7 | 0.687 | 52 | 1 |
| 5 | 104 | 74  | 29.34 | 153.74 | 28.8 | 0.153 | 48 | 0 |
| 5 | 104 | 74  | 29.34 | 153.74 | 28.8 | 0.153 | 48 | 0 |
| 5 | 104 | 74  | 29.34 | 153.74 | 28.8 | 0.153 | 48 | 0 |
| 7 | 142 | 60  | 33    | 190    | 28.8 | 0.687 | 61 | 0 |
| 7 | 142 | 60  | 33    | 190    | 28.8 | 0.687 | 61 | 0 |
| 4 | 114 | 64  | 29.34 | 153.74 | 28.9 | 0.126 | 24 | 0 |
| 4 | 114 | 64  | 29.34 | 153.74 | 28.9 | 0.126 | 24 | 0 |
| 4 | 114 | 64  | 29.34 | 153.74 | 28.9 | 0.126 | 24 | 0 |
| 2 | 134 | 70  | 29.34 | 153.74 | 28.9 | 0.542 | 23 | 1 |
| 2 | 134 | 70  | 29.34 | 153.74 | 28.9 | 0.542 | 23 | 1 |
| 2 | 134 | 70  | 29.34 | 153.74 | 28.9 | 0.542 | 23 | 1 |
| 4 | 115 | 72  | 29.34 | 153.74 | 28.9 | 0.376 | 46 | 1 |

|   |     |      |       |        |      |       |    |   |
|---|-----|------|-------|--------|------|-------|----|---|
| 4 | 115 | 72   | 29.34 | 153.74 | 28.9 | 0.376 | 46 | 1 |
| 4 | 115 | 72   | 29.34 | 153.74 | 28.9 | 0.376 | 46 | 1 |
| 4 | 115 | 72   | 29.34 | 153.74 | 28.9 | 0.376 | 46 | 1 |
| 2 | 87  | 72.4 | 23    | 153.74 | 28.9 | 0.773 | 25 | 0 |
| 2 | 87  | 72.4 | 23    | 153.74 | 28.9 | 0.773 | 25 | 0 |
| 2 | 87  | 72.4 | 23    | 153.74 | 28.9 | 0.773 | 25 | 0 |
| 4 | 146 | 85   | 27    | 100    | 28.9 | 0.189 | 27 | 0 |
| 4 | 146 | 85   | 27    | 100    | 28.9 | 0.189 | 27 | 0 |
| 4 | 125 | 70   | 18    | 122    | 28.9 | 1.144 | 45 | 1 |
| 4 | 125 | 70   | 18    | 122    | 28.9 | 1.144 | 45 | 1 |
| 4 | 125 | 70   | 18    | 122    | 28.9 | 1.144 | 45 | 1 |
| 4 | 125 | 70   | 18    | 122    | 28.9 | 1.144 | 45 | 1 |
| 4 | 125 | 70   | 18    | 122    | 28.9 | 1.144 | 45 | 1 |
| 5 | 85  | 74   | 22    | 153.74 | 29   | 1.224 | 32 | 1 |
| 5 | 85  | 74   | 22    | 153.74 | 29   | 1.224 | 32 | 1 |
| 5 | 99  | 74   | 27    | 153.74 | 29   | 0.203 | 32 | 0 |
| 5 | 99  | 74   | 27    | 153.74 | 29   | 0.203 | 32 | 0 |
| 2 | 88  | 74   | 19    | 53     | 29   | 0.229 | 22 | 0 |
| 2 | 88  | 74   | 19    | 53     | 29   | 0.229 | 22 | 0 |
| 2 | 88  | 74   | 19    | 53     | 29   | 0.229 | 22 | 0 |
| 2 | 106 | 56   | 27    | 165    | 29   | 0.426 | 22 | 0 |
| 2 | 106 | 56   | 27    | 165    | 29   | 0.426 | 22 | 0 |
| 2 | 106 | 56   | 27    | 165    | 29   | 0.426 | 22 | 0 |
| 1 | 91  | 64   | 24    | 153.74 | 29.2 | 0.192 | 21 | 0 |
| 1 | 91  | 64   | 24    | 153.74 | 29.2 | 0.192 | 21 | 0 |
| 4 | 83  | 86   | 19    | 153.74 | 29.3 | 0.317 | 34 | 0 |
| 4 | 83  | 86   | 19    | 153.74 | 29.3 | 0.317 | 34 | 0 |
| 4 | 83  | 86   | 19    | 153.74 | 29.3 | 0.317 | 34 | 0 |
| 7 | 83  | 78   | 26    | 71     | 29.3 | 0.767 | 36 | 0 |
| 7 | 83  | 78   | 26    | 71     | 29.3 | 0.767 | 36 | 0 |
| 0 | 102 | 86   | 17    | 105    | 29.3 | 0.695 | 27 | 0 |
| 0 | 102 | 86   | 17    | 105    | 29.3 | 0.695 | 27 | 0 |
| 0 | 102 | 86   | 17    | 105    | 29.3 | 0.695 | 27 | 0 |
| 1 | 149 | 68   | 29    | 127    | 29.3 | 0.349 | 42 | 1 |
| 1 | 149 | 68   | 29    | 127    | 29.3 | 0.349 | 42 | 1 |
| 1 | 149 | 68   | 29    | 127    | 29.3 | 0.349 | 42 | 1 |
| 6 | 154 | 74   | 32    | 193    | 29.3 | 0.839 | 39 | 0 |
| 6 | 154 | 74   | 32    | 193    | 29.3 | 0.839 | 39 | 0 |
| 6 | 154 | 74   | 32    | 193    | 29.3 | 0.839 | 39 | 0 |
| 6 | 154 | 74   | 32    | 193    | 29.3 | 0.839 | 39 | 0 |
| 6 | 154 | 74   | 32    | 193    | 29.3 | 0.839 | 39 | 0 |
| 3 | 102 | 74   | 29.34 | 153.74 | 29.5 | 0.121 | 32 | 0 |
| 3 | 102 | 74   | 29.34 | 153.74 | 29.5 | 0.121 | 32 | 0 |
| 3 | 102 | 74   | 29.34 | 153.74 | 29.5 | 0.121 | 32 | 0 |
| 6 | 147 | 80   | 29.34 | 153.74 | 29.5 | 0.178 | 50 | 1 |
| 6 | 147 | 80   | 29.34 | 153.74 | 29.5 | 0.178 | 50 | 1 |
| 6 | 147 | 80   | 29.34 | 153.74 | 29.5 | 0.178 | 50 | 1 |
| 3 | 111 | 58   | 31    | 44     | 29.5 | 0.43  | 22 | 0 |
| 3 | 111 | 58   | 31    | 44     | 29.5 | 0.43  | 22 | 0 |
| 3 | 113 | 50   | 10    | 85     | 29.5 | 0.626 | 25 | 0 |
| 3 | 113 | 50   | 10    | 85     | 29.5 | 0.626 | 25 | 0 |

|    |     |      |       |        |      |       |    |   |
|----|-----|------|-------|--------|------|-------|----|---|
| 3  | 113 | 50   | 10    | 85     | 29.5 | 0.626 | 25 | 0 |
| 4  | 144 | 58   | 28    | 140    | 29.5 | 0.287 | 37 | 0 |
| 4  | 144 | 58   | 28    | 140    | 29.5 | 0.287 | 37 | 0 |
| 4  | 144 | 58   | 28    | 140    | 29.5 | 0.287 | 37 | 0 |
| 4  | 120 | 68   | 29.34 | 153.74 | 29.6 | 0.709 | 34 | 0 |
| 4  | 120 | 68   | 29.34 | 153.74 | 29.6 | 0.709 | 34 | 0 |
| 4  | 120 | 68   | 29.34 | 153.74 | 29.6 | 0.709 | 34 | 0 |
| 0  | 105 | 90   | 29.34 | 153.74 | 29.6 | 0.197 | 46 | 0 |
| 0  | 105 | 90   | 29.34 | 153.74 | 29.6 | 0.197 | 46 | 0 |
| 5  | 126 | 78   | 27    | 22     | 29.6 | 0.439 | 40 | 0 |
| 5  | 126 | 78   | 27    | 22     | 29.6 | 0.439 | 40 | 0 |
| 5  | 126 | 78   | 27    | 22     | 29.6 | 0.439 | 40 | 0 |
| 1  | 146 | 56   | 29.34 | 153.74 | 29.7 | 0.564 | 29 | 0 |
| 1  | 146 | 56   | 29.34 | 153.74 | 29.7 | 0.564 | 29 | 0 |
| 4  | 117 | 62   | 12    | 153.74 | 29.7 | 0.38  | 30 | 1 |
| 4  | 117 | 62   | 12    | 153.74 | 29.7 | 0.38  | 30 | 1 |
| 4  | 117 | 62   | 12    | 153.74 | 29.7 | 0.38  | 30 | 1 |
| 2  | 100 | 64   | 23    | 153.74 | 29.7 | 0.368 | 21 | 0 |
| 2  | 100 | 64   | 23    | 153.74 | 29.7 | 0.368 | 21 | 0 |
| 2  | 100 | 64   | 23    | 153.74 | 29.7 | 0.368 | 21 | 0 |
| 12 | 84  | 72   | 31    | 153.74 | 29.7 | 0.297 | 46 | 1 |
| 12 | 84  | 72   | 31    | 153.74 | 29.7 | 0.297 | 46 | 1 |
| 12 | 84  | 72   | 31    | 153.74 | 29.7 | 0.297 | 46 | 1 |
| 4  | 151 | 90   | 38    | 153.74 | 29.7 | 0.294 | 36 | 0 |
| 4  | 151 | 90   | 38    | 153.74 | 29.7 | 0.294 | 36 | 0 |
| 4  | 151 | 90   | 38    | 153.74 | 29.7 | 0.294 | 36 | 0 |
| 3  | 74  | 68   | 28    | 45     | 29.7 | 0.293 | 23 | 0 |
| 3  | 74  | 68   | 28    | 45     | 29.7 | 0.293 | 23 | 0 |
| 2  | 75  | 64   | 24    | 55     | 29.7 | 0.37  | 33 | 0 |
| 2  | 75  | 64   | 24    | 55     | 29.7 | 0.37  | 33 | 0 |
| 2  | 75  | 64   | 24    | 55     | 29.7 | 0.37  | 33 | 0 |
| 4  | 173 | 70   | 14    | 168    | 29.7 | 0.361 | 33 | 1 |
| 4  | 173 | 70   | 14    | 168    | 29.7 | 0.361 | 33 | 1 |
| 4  | 173 | 70   | 14    | 168    | 29.7 | 0.361 | 33 | 1 |
| 6  | 91  | 72.4 | 29.34 | 153.74 | 29.8 | 0.501 | 31 | 0 |
| 6  | 91  | 72.4 | 29.34 | 153.74 | 29.8 | 0.501 | 31 | 0 |
| 5  | 158 | 70   | 29.34 | 153.74 | 29.8 | 0.207 | 63 | 0 |
| 5  | 158 | 70   | 29.34 | 153.74 | 29.8 | 0.207 | 63 | 0 |
| 5  | 158 | 70   | 29.34 | 153.74 | 29.8 | 0.207 | 63 | 0 |
| 2  | 122 | 60   | 18    | 106    | 29.8 | 0.717 | 22 | 0 |
| 2  | 122 | 60   | 18    | 106    | 29.8 | 0.717 | 22 | 0 |
| 5  | 147 | 75   | 29.34 | 153.74 | 29.9 | 0.434 | 28 | 0 |
| 5  | 147 | 75   | 29.34 | 153.74 | 29.9 | 0.434 | 28 | 0 |
| 5  | 147 | 75   | 29.34 | 153.74 | 29.9 | 0.434 | 28 | 0 |
| 7  | 136 | 90   | 29.34 | 153.74 | 29.9 | 0.21  | 50 | 0 |
| 7  | 136 | 90   | 29.34 | 153.74 | 29.9 | 0.21  | 50 | 0 |
| 7  | 136 | 90   | 29.34 | 153.74 | 29.9 | 0.21  | 50 | 0 |
| 1  | 88  | 62   | 24    | 44     | 29.9 | 0.422 | 23 | 0 |
| 1  | 88  | 62   | 24    | 44     | 29.9 | 0.422 | 23 | 0 |
| 3  | 169 | 74   | 19    | 125    | 29.9 | 0.268 | 31 | 1 |
| 3  | 169 | 74   | 19    | 125    | 29.9 | 0.268 | 31 | 1 |

|    |     |      |       |        |      |       |    |   |
|----|-----|------|-------|--------|------|-------|----|---|
| 3  | 169 | 74   | 19    | 125    | 29.9 | 0.268 | 31 | 1 |
| 6  | 104 | 74   | 18    | 156    | 29.9 | 0.722 | 41 | 1 |
| 6  | 104 | 74   | 18    | 156    | 29.9 | 0.722 | 41 | 1 |
| 6  | 104 | 74   | 18    | 156    | 29.9 | 0.722 | 41 | 1 |
| 8  | 120 | 72.4 | 29.34 | 153.74 | 30   | 0.183 | 38 | 1 |
| 8  | 120 | 72.4 | 29.34 | 153.74 | 30   | 0.183 | 38 | 1 |
| 8  | 120 | 72.4 | 29.34 | 153.74 | 30   | 0.183 | 38 | 1 |
| 3  | 141 | 72.4 | 29.34 | 153.74 | 30   | 0.761 | 27 | 1 |
| 3  | 141 | 72.4 | 29.34 | 153.74 | 30   | 0.761 | 27 | 1 |
| 9  | 184 | 85   | 15    | 153.74 | 30   | 1.213 | 49 | 1 |
| 9  | 184 | 85   | 15    | 153.74 | 30   | 1.213 | 49 | 1 |
| 1  | 80  | 74   | 11    | 60     | 30   | 0.527 | 22 | 0 |
| 1  | 80  | 74   | 11    | 60     | 30   | 0.527 | 22 | 0 |
| 1  | 80  | 74   | 11    | 60     | 30   | 0.527 | 22 | 0 |
| 1  | 80  | 74   | 11    | 60     | 30   | 0.527 | 22 | 0 |
| 12 | 100 | 84   | 33    | 105    | 30   | 0.488 | 46 | 0 |
| 12 | 100 | 84   | 33    | 105    | 30   | 0.488 | 46 | 0 |
| 12 | 100 | 84   | 33    | 105    | 30   | 0.488 | 46 | 0 |
| 6  | 125 | 68   | 30    | 120    | 30   | 0.464 | 32 | 0 |
| 6  | 125 | 68   | 30    | 120    | 30   | 0.464 | 32 | 0 |
| 2  | 92  | 52   | 29.34 | 153.74 | 30.1 | 0.141 | 22 | 0 |
| 2  | 92  | 52   | 29.34 | 153.74 | 30.1 | 0.141 | 22 | 0 |
| 2  | 92  | 52   | 29.34 | 153.74 | 30.1 | 0.141 | 22 | 0 |
| 1  | 126 | 60   | 29.34 | 153.74 | 30.1 | 0.349 | 47 | 1 |
| 1  | 126 | 60   | 29.34 | 153.74 | 30.1 | 0.349 | 47 | 1 |
| 1  | 126 | 60   | 29.34 | 153.74 | 30.1 | 0.349 | 47 | 1 |
| 11 | 85  | 74   | 29.34 | 153.74 | 30.1 | 0.3   | 35 | 0 |
| 11 | 85  | 74   | 29.34 | 153.74 | 30.1 | 0.3   | 35 | 0 |
| 1  | 111 | 86   | 19    | 153.74 | 30.1 | 0.143 | 23 | 0 |
| 1  | 111 | 86   | 19    | 153.74 | 30.1 | 0.143 | 23 | 0 |
| 3  | 111 | 56   | 39    | 153.74 | 30.1 | 0.557 | 30 | 0 |
| 3  | 111 | 56   | 39    | 153.74 | 30.1 | 0.557 | 30 | 0 |
| 2  | 81  | 72   | 15    | 76     | 30.1 | 0.547 | 25 | 0 |
| 2  | 81  | 72   | 15    | 76     | 30.1 | 0.547 | 25 | 0 |
| 2  | 81  | 72   | 15    | 76     | 30.1 | 0.547 | 25 | 0 |
| 2  | 81  | 72   | 15    | 76     | 30.1 | 0.547 | 25 | 0 |
| 2  | 81  | 72   | 15    | 76     | 30.1 | 0.547 | 25 | 0 |
| 2  | 81  | 72   | 15    | 76     | 30.1 | 0.547 | 25 | 0 |
| 1  | 143 | 86   | 30    | 330    | 30.1 | 0.892 | 23 | 0 |
| 1  | 143 | 86   | 30    | 330    | 30.1 | 0.892 | 23 | 0 |
| 8  | 181 | 68   | 36    | 495    | 30.1 | 0.615 | 60 | 1 |
| 8  | 181 | 68   | 36    | 495    | 30.1 | 0.615 | 60 | 1 |
| 5  | 86  | 68   | 28    | 71     | 30.2 | 0.364 | 24 | 0 |
| 5  | 86  | 68   | 28    | 71     | 30.2 | 0.364 | 24 | 0 |
| 5  | 86  | 68   | 28    | 71     | 30.2 | 0.364 | 24 | 0 |
| 9  | 145 | 88   | 34    | 165    | 30.3 | 0.771 | 53 | 1 |
| 9  | 145 | 88   | 34    | 165    | 30.3 | 0.771 | 53 | 1 |
| 7  | 159 | 66   | 29.34 | 153.74 | 30.4 | 0.383 | 36 | 1 |
| 7  | 159 | 66   | 29.34 | 153.74 | 30.4 | 0.383 | 36 | 1 |
| 7  | 161 | 86   | 29.34 | 153.74 | 30.4 | 0.165 | 47 | 1 |
| 7  | 161 | 86   | 29.34 | 153.74 | 30.4 | 0.165 | 47 | 1 |



|   |     |    |       |        |      |       |    |   |
|---|-----|----|-------|--------|------|-------|----|---|
| 9 | 165 | 88 | 29.34 | 153.74 | 30.4 | 0.302 | 49 | 1 |
| 9 | 165 | 88 | 29.34 | 153.74 | 30.4 | 0.302 | 49 | 1 |
| 9 | 165 | 88 | 29.34 | 153.74 | 30.4 | 0.302 | 49 | 1 |
| 1 | 93  | 70 | 31    | 153.74 | 30.4 | 0.315 | 23 | 0 |
| 1 | 93  | 70 | 31    | 153.74 | 30.4 | 0.315 | 23 | 0 |
| 2 | 84  | 50 | 23    | 76     | 30.4 | 0.968 | 21 | 0 |
| 2 | 84  | 50 | 23    | 76     | 30.4 | 0.968 | 21 | 0 |
| 2 | 84  | 50 | 23    | 76     | 30.4 | 0.968 | 21 | 0 |
| 3 | 89  | 74 | 16    | 85     | 30.4 | 0.551 | 38 | 0 |
| 3 | 89  | 74 | 16    | 85     | 30.4 | 0.551 | 38 | 0 |
| 3 | 89  | 74 | 16    | 85     | 30.4 | 0.551 | 38 | 0 |
| 3 | 89  | 74 | 16    | 85     | 30.4 | 0.551 | 38 | 0 |
| 7 | 142 | 90 | 24    | 480    | 30.4 | 0.128 | 43 | 1 |
| 7 | 142 | 90 | 24    | 480    | 30.4 | 0.128 | 43 | 1 |
| 7 | 142 | 90 | 24    | 480    | 30.4 | 0.128 | 43 | 1 |
| 8 | 108 | 70 | 29.34 | 153.74 | 30.5 | 0.955 | 33 | 1 |
| 8 | 108 | 70 | 29.34 | 153.74 | 30.5 | 0.955 | 33 | 1 |
| 8 | 108 | 70 | 29.34 | 153.74 | 30.5 | 0.955 | 33 | 1 |
| 3 | 182 | 74 | 29.34 | 153.74 | 30.5 | 0.345 | 29 | 1 |
| 3 | 182 | 74 | 29.34 | 153.74 | 30.5 | 0.345 | 29 | 1 |
| 3 | 182 | 74 | 29.34 | 153.74 | 30.5 | 0.345 | 29 | 1 |
| 0 | 120 | 74 | 18    | 63     | 30.5 | 0.285 | 26 | 0 |
| 0 | 120 | 74 | 18    | 63     | 30.5 | 0.285 | 26 | 0 |
| 0 | 120 | 74 | 18    | 63     | 30.5 | 0.285 | 26 | 0 |
| 2 | 106 | 64 | 35    | 119    | 30.5 | 1.4   | 34 | 0 |
| 2 | 106 | 64 | 35    | 119    | 30.5 | 1.4   | 34 | 0 |
| 2 | 106 | 64 | 35    | 119    | 30.5 | 1.4   | 34 | 0 |
| 7 | 160 | 54 | 32    | 175    | 30.5 | 0.588 | 39 | 1 |
| 7 | 160 | 54 | 32    | 175    | 30.5 | 0.588 | 39 | 1 |
| 7 | 160 | 54 | 32    | 175    | 30.5 | 0.588 | 39 | 1 |
| 0 | 128 | 68 | 19    | 180    | 30.5 | 1.391 | 25 | 1 |
| 0 | 128 | 68 | 19    | 180    | 30.5 | 1.391 | 25 | 1 |
| 0 | 128 | 68 | 19    | 180    | 30.5 | 1.391 | 25 | 1 |
| 0 | 126 | 84 | 29    | 215    | 30.7 | 0.52  | 24 | 0 |
| 0 | 126 | 84 | 29    | 215    | 30.7 | 0.52  | 24 | 0 |
| 0 | 126 | 84 | 29    | 215    | 30.7 | 0.52  | 24 | 0 |
| 0 | 126 | 84 | 29    | 215    | 30.7 | 0.52  | 24 | 0 |
| 2 | 108 | 64 | 29.34 | 153.74 | 30.8 | 0.158 | 21 | 0 |
| 2 | 108 | 64 | 29.34 | 153.74 | 30.8 | 0.158 | 21 | 0 |
| 2 | 108 | 64 | 29.34 | 153.74 | 30.8 | 0.158 | 21 | 0 |
| 6 | 102 | 82 | 29.34 | 153.74 | 30.8 | 0.18  | 36 | 1 |
| 6 | 102 | 82 | 29.34 | 153.74 | 30.8 | 0.18  | 36 | 1 |
| 6 | 102 | 82 | 29.34 | 153.74 | 30.8 | 0.18  | 36 | 1 |
| 9 | 164 | 84 | 21    | 153.74 | 30.8 | 0.831 | 32 | 1 |
| 9 | 164 | 84 | 21    | 153.74 | 30.8 | 0.831 | 32 | 1 |
| 2 | 115 | 64 | 22    | 153.74 | 30.8 | 0.421 | 21 | 0 |
| 2 | 115 | 64 | 22    | 153.74 | 30.8 | 0.421 | 21 | 0 |
| 2 | 115 | 64 | 22    | 153.74 | 30.8 | 0.421 | 21 | 0 |
| 2 | 115 | 64 | 22    | 153.74 | 30.8 | 0.421 | 21 | 0 |
| 0 | 100 | 70 | 26    | 50     | 30.8 | 0.597 | 21 | 0 |
| 0 | 100 | 70 | 26    | 50     | 30.8 | 0.597 | 21 | 0 |

|    |     |    |       |        |      |       |    |   |
|----|-----|----|-------|--------|------|-------|----|---|
| 0  | 100 | 70 | 26    | 50     | 30.8 | 0.597 | 21 | 0 |
| 6  | 105 | 70 | 32    | 68     | 30.8 | 0.122 | 37 | 0 |
| 6  | 105 | 70 | 32    | 68     | 30.8 | 0.122 | 37 | 0 |
| 1  | 107 | 72 | 30    | 82     | 30.8 | 0.821 | 24 | 0 |
| 1  | 107 | 72 | 30    | 82     | 30.8 | 0.821 | 24 | 0 |
| 1  | 107 | 72 | 30    | 82     | 30.8 | 0.821 | 24 | 0 |
| 3  | 102 | 44 | 20    | 94     | 30.8 | 0.4   | 26 | 0 |
| 3  | 102 | 44 | 20    | 94     | 30.8 | 0.4   | 26 | 0 |
| 3  | 102 | 44 | 20    | 94     | 30.8 | 0.4   | 26 | 0 |
| 0  | 117 | 66 | 31    | 188    | 30.8 | 0.493 | 22 | 0 |
| 6  | 195 | 70 | 29.34 | 153.74 | 30.9 | 0.328 | 31 | 1 |
| 6  | 195 | 70 | 29.34 | 153.74 | 30.9 | 0.328 | 31 | 1 |
| 6  | 195 | 70 | 29.34 | 153.74 | 30.9 | 0.328 | 31 | 1 |
| 9  | 154 | 78 | 30    | 100    | 30.9 | 0.164 | 45 | 0 |
| 9  | 154 | 78 | 30    | 100    | 30.9 | 0.164 | 45 | 0 |
| 9  | 154 | 78 | 30    | 100    | 30.9 | 0.164 | 45 | 0 |
| 3  | 191 | 68 | 15    | 130    | 30.9 | 0.299 | 34 | 0 |
| 3  | 191 | 68 | 15    | 130    | 30.9 | 0.299 | 34 | 0 |
| 3  | 106 | 54 | 21    | 158    | 30.9 | 0.292 | 24 | 0 |
| 3  | 106 | 54 | 21    | 158    | 30.9 | 0.292 | 24 | 0 |
| 3  | 106 | 54 | 21    | 158    | 30.9 | 0.292 | 24 | 0 |
| 4  | 148 | 60 | 27    | 318    | 30.9 | 0.15  | 29 | 1 |
| 4  | 148 | 60 | 27    | 318    | 30.9 | 0.15  | 29 | 1 |
| 0  | 113 | 80 | 16    | 153.74 | 31   | 0.874 | 21 | 0 |
| 0  | 113 | 80 | 16    | 153.74 | 31   | 0.874 | 21 | 0 |
| 9  | 106 | 52 | 29.34 | 153.74 | 31.2 | 0.38  | 42 | 0 |
| 9  | 106 | 52 | 29.34 | 153.74 | 31.2 | 0.38  | 42 | 0 |
| 10 | 122 | 68 | 29.34 | 153.74 | 31.2 | 0.258 | 41 | 0 |
| 10 | 122 | 68 | 29.34 | 153.74 | 31.2 | 0.258 | 41 | 0 |
| 4  | 136 | 70 | 29.34 | 153.74 | 31.2 | 1.182 | 22 | 1 |
| 4  | 136 | 70 | 29.34 | 153.74 | 31.2 | 1.182 | 22 | 1 |
| 4  | 136 | 70 | 29.34 | 153.74 | 31.2 | 1.182 | 22 | 1 |
| 13 | 104 | 72 | 29.34 | 153.74 | 31.2 | 0.465 | 38 | 1 |
| 13 | 104 | 72 | 29.34 | 153.74 | 31.2 | 0.465 | 38 | 1 |
| 13 | 104 | 72 | 29.34 | 153.74 | 31.2 | 0.465 | 38 | 1 |
| 5  | 115 | 76 | 29.34 | 153.74 | 31.2 | 0.343 | 44 | 1 |
| 5  | 115 | 76 | 29.34 | 153.74 | 31.2 | 0.343 | 44 | 1 |
| 6  | 85  | 78 | 29.34 | 153.74 | 31.2 | 0.382 | 42 | 0 |
| 6  | 85  | 78 | 29.34 | 153.74 | 31.2 | 0.382 | 42 | 0 |
| 6  | 85  | 78 | 29.34 | 153.74 | 31.2 | 0.382 | 42 | 0 |
| 0  | 129 | 80 | 29.34 | 153.74 | 31.2 | 0.703 | 29 | 0 |
| 0  | 129 | 80 | 29.34 | 153.74 | 31.2 | 0.703 | 29 | 0 |
| 0  | 129 | 80 | 29.34 | 153.74 | 31.2 | 0.703 | 29 | 0 |
| 4  | 137 | 84 | 29.34 | 153.74 | 31.2 | 0.252 | 30 | 0 |
| 4  | 137 | 84 | 29.34 | 153.74 | 31.2 | 0.252 | 30 | 0 |
| 4  | 137 | 84 | 29.34 | 153.74 | 31.2 | 0.252 | 30 | 0 |
| 4  | 146 | 92 | 29.34 | 153.74 | 31.2 | 0.539 | 61 | 1 |
| 4  | 146 | 92 | 29.34 | 153.74 | 31.2 | 0.539 | 61 | 1 |
| 4  | 146 | 92 | 29.34 | 153.74 | 31.2 | 0.539 | 61 | 1 |
| 1  | 89  | 76 | 34    | 37     | 31.2 | 0.192 | 23 | 0 |
| 1  | 89  | 76 | 34    | 37     | 31.2 | 0.192 | 23 | 0 |

|   |     |    |       |        |      |       |    |   |
|---|-----|----|-------|--------|------|-------|----|---|
| 1 | 89  | 76 | 34    | 37     | 31.2 | 0.192 | 23 | 0 |
| 5 | 189 | 64 | 33    | 325    | 31.2 | 0.583 | 29 | 1 |
| 5 | 189 | 64 | 33    | 325    | 31.2 | 0.583 | 29 | 1 |
| 5 | 189 | 64 | 33    | 325    | 31.2 | 0.583 | 29 | 1 |
| 3 | 158 | 64 | 13    | 387    | 31.2 | 0.295 | 24 | 0 |
| 3 | 158 | 64 | 13    | 387    | 31.2 | 0.295 | 24 | 0 |
| 3 | 158 | 64 | 13    | 387    | 31.2 | 0.295 | 24 | 0 |
| 4 | 154 | 72 | 29    | 126    | 31.3 | 0.338 | 37 | 0 |
| 4 | 154 | 72 | 29    | 126    | 31.3 | 0.338 | 37 | 0 |
| 3 | 125 | 58 | 29.34 | 153.74 | 31.6 | 0.151 | 24 | 0 |
| 0 | 131 | 88 | 29.34 | 153.74 | 31.6 | 0.743 | 32 | 1 |
| 0 | 131 | 88 | 29.34 | 153.74 | 31.6 | 0.743 | 32 | 1 |
| 0 | 131 | 88 | 29.34 | 153.74 | 31.6 | 0.743 | 32 | 1 |
| 2 | 158 | 90 | 29.34 | 153.74 | 31.6 | 0.805 | 66 | 1 |
| 2 | 158 | 90 | 29.34 | 153.74 | 31.6 | 0.805 | 66 | 1 |
| 9 | 72  | 78 | 25    | 153.74 | 31.6 | 0.28  | 38 | 0 |
| 9 | 72  | 78 | 25    | 153.74 | 31.6 | 0.28  | 38 | 0 |
| 9 | 72  | 78 | 25    | 153.74 | 31.6 | 0.28  | 38 | 0 |
| 9 | 72  | 78 | 25    | 153.74 | 31.6 | 0.28  | 38 | 0 |
| 2 | 92  | 62 | 28    | 153.74 | 31.6 | 0.13  | 24 | 0 |
| 2 | 92  | 62 | 28    | 153.74 | 31.6 | 0.13  | 24 | 0 |
| 3 | 112 | 74 | 30    | 153.74 | 31.6 | 0.197 | 25 | 1 |
| 3 | 112 | 74 | 30    | 153.74 | 31.6 | 0.197 | 25 | 1 |
| 3 | 112 | 74 | 30    | 153.74 | 31.6 | 0.197 | 25 | 1 |
| 2 | 94  | 76 | 18    | 66     | 31.6 | 0.649 | 23 | 0 |
| 2 | 94  | 76 | 18    | 66     | 31.6 | 0.649 | 23 | 0 |
| 2 | 94  | 76 | 18    | 66     | 31.6 | 0.649 | 23 | 0 |
| 3 | 100 | 68 | 23    | 81     | 31.6 | 0.949 | 28 | 0 |
| 3 | 100 | 68 | 23    | 81     | 31.6 | 0.949 | 28 | 0 |
| 3 | 100 | 68 | 23    | 81     | 31.6 | 0.949 | 28 | 0 |
| 3 | 163 | 70 | 18    | 105    | 31.6 | 0.268 | 28 | 1 |
| 3 | 163 | 70 | 18    | 105    | 31.6 | 0.268 | 28 | 1 |
| 3 | 163 | 70 | 18    | 105    | 31.6 | 0.268 | 28 | 1 |
| 2 | 144 | 58 | 33    | 135    | 31.6 | 0.422 | 25 | 1 |
| 2 | 144 | 58 | 33    | 135    | 31.6 | 0.422 | 25 | 1 |
| 2 | 144 | 58 | 33    | 135    | 31.6 | 0.422 | 25 | 1 |
| 5 | 139 | 80 | 35    | 160    | 31.6 | 0.361 | 25 | 1 |
| 5 | 139 | 80 | 35    | 160    | 31.6 | 0.361 | 25 | 1 |
| 4 | 110 | 66 | 29.34 | 153.74 | 31.9 | 0.471 | 29 | 0 |
| 4 | 110 | 66 | 29.34 | 153.74 | 31.9 | 0.471 | 29 | 0 |
| 4 | 110 | 66 | 29.34 | 153.74 | 31.9 | 0.471 | 29 | 0 |
| 3 | 84  | 68 | 30    | 106    | 31.9 | 0.591 | 25 | 0 |
| 3 | 84  | 68 | 30    | 106    | 31.9 | 0.591 | 25 | 0 |
| 4 | 123 | 62 | 29.34 | 153.74 | 32   | 0.226 | 35 | 1 |
| 4 | 123 | 62 | 29.34 | 153.74 | 32   | 0.226 | 35 | 1 |
| 4 | 95  | 64 | 29.34 | 153.74 | 32   | 0.161 | 31 | 1 |
| 4 | 95  | 64 | 29.34 | 153.74 | 32   | 0.161 | 31 | 1 |
| 4 | 95  | 64 | 29.34 | 153.74 | 32   | 0.161 | 31 | 1 |
| 4 | 95  | 64 | 29.34 | 153.74 | 32   | 0.161 | 31 | 1 |
| 8 | 65  | 72 | 23    | 153.74 | 32   | 0.6   | 42 | 0 |
| 8 | 65  | 72 | 23    | 153.74 | 32   | 0.6   | 42 | 0 |

|    |        |      |       |        |      |       |    |   |
|----|--------|------|-------|--------|------|-------|----|---|
| 8  | 65     | 72   | 23    | 153.74 | 32   | 0.6   | 42 | 0 |
| 1  | 79     | 75   | 30    | 153.74 | 32   | 0.396 | 22 | 0 |
| 1  | 79     | 75   | 30    | 153.74 | 32   | 0.396 | 22 | 0 |
| 1  | 121.98 | 68   | 35    | 153.74 | 32   | 0.389 | 22 | 0 |
| 1  | 121.98 | 68   | 35    | 153.74 | 32   | 0.389 | 22 | 0 |
| 1  | 121.98 | 68   | 35    | 153.74 | 32   | 0.389 | 22 | 0 |
| 7  | 137    | 90   | 41    | 153.74 | 32   | 0.391 | 39 | 0 |
| 7  | 137    | 90   | 41    | 153.74 | 32   | 0.391 | 39 | 0 |
| 7  | 137    | 90   | 41    | 153.74 | 32   | 0.391 | 39 | 0 |
| 1  | 128    | 98   | 41    | 58     | 32   | 1.321 | 33 | 1 |
| 1  | 128    | 98   | 41    | 58     | 32   | 1.321 | 33 | 1 |
| 1  | 88     | 78   | 29    | 76     | 32   | 0.365 | 29 | 0 |
| 1  | 88     | 78   | 29    | 76     | 32   | 0.365 | 29 | 0 |
| 6  | 92     | 62   | 32    | 126    | 32   | 0.085 | 46 | 0 |
| 6  | 92     | 62   | 32    | 126    | 32   | 0.085 | 46 | 0 |
| 4  | 123    | 80   | 15    | 176    | 32   | 0.443 | 34 | 0 |
| 4  | 123    | 80   | 15    | 176    | 32   | 0.443 | 34 | 0 |
| 0  | 188    | 82   | 14    | 185    | 32   | 0.682 | 22 | 1 |
| 0  | 188    | 82   | 14    | 185    | 32   | 0.682 | 22 | 1 |
| 1  | 100    | 66   | 29    | 196    | 32   | 0.444 | 42 | 0 |
| 1  | 100    | 66   | 29    | 196    | 32   | 0.444 | 42 | 0 |
| 1  | 100    | 66   | 29    | 196    | 32   | 0.444 | 42 | 0 |
| 5  | 144    | 82   | 26    | 285    | 32   | 0.452 | 58 | 1 |
| 5  | 144    | 82   | 26    | 285    | 32   | 0.452 | 58 | 1 |
| 5  | 144    | 82   | 26    | 285    | 32   | 0.452 | 58 | 1 |
| 4  | 95     | 70   | 32    | 153.74 | 32.1 | 0.612 | 24 | 0 |
| 4  | 95     | 70   | 32    | 153.74 | 32.1 | 0.612 | 24 | 0 |
| 2  | 83     | 66   | 23    | 50     | 32.2 | 0.497 | 22 | 0 |
| 2  | 83     | 66   | 23    | 50     | 32.2 | 0.497 | 22 | 0 |
| 2  | 83     | 66   | 23    | 50     | 32.2 | 0.497 | 22 | 0 |
| 0  | 167    | 72.4 | 29.34 | 153.74 | 32.3 | 0.839 | 30 | 1 |
| 0  | 167    | 72.4 | 29.34 | 153.74 | 32.3 | 0.839 | 30 | 1 |
| 0  | 167    | 72.4 | 29.34 | 153.74 | 32.3 | 0.839 | 30 | 1 |
| 4  | 125    | 80   | 29.34 | 153.74 | 32.3 | 0.536 | 27 | 1 |
| 4  | 125    | 80   | 29.34 | 153.74 | 32.3 | 0.536 | 27 | 1 |
| 4  | 125    | 80   | 29.34 | 153.74 | 32.3 | 0.536 | 27 | 1 |
| 5  | 116    | 74   | 29    | 153.74 | 32.3 | 0.66  | 35 | 1 |
| 5  | 116    | 74   | 29    | 153.74 | 32.3 | 0.66  | 35 | 1 |
| 5  | 116    | 74   | 29    | 153.74 | 32.3 | 0.66  | 35 | 1 |
| 0  | 119    | 72.4 | 29.34 | 153.74 | 32.4 | 0.141 | 24 | 1 |
| 0  | 119    | 72.4 | 29.34 | 153.74 | 32.4 | 0.141 | 24 | 1 |
| 0  | 119    | 72.4 | 29.34 | 153.74 | 32.4 | 0.141 | 24 | 1 |
| 10 | 108    | 66   | 29.34 | 153.74 | 32.4 | 0.272 | 42 | 1 |
| 10 | 108    | 66   | 29.34 | 153.74 | 32.4 | 0.272 | 42 | 1 |
| 10 | 108    | 66   | 29.34 | 153.74 | 32.4 | 0.272 | 42 | 1 |
| 0  | 132    | 78   | 29.34 | 153.74 | 32.4 | 0.393 | 21 | 0 |
| 0  | 132    | 78   | 29.34 | 153.74 | 32.4 | 0.393 | 21 | 0 |
| 0  | 132    | 78   | 29.34 | 153.74 | 32.4 | 0.393 | 21 | 0 |
| 0  | 91     | 80   | 29.34 | 153.74 | 32.4 | 0.601 | 27 | 0 |
| 0  | 91     | 80   | 29.34 | 153.74 | 32.4 | 0.601 | 27 | 0 |
| 3  | 142    | 80   | 15    | 153.74 | 32.4 | 0.2   | 63 | 0 |

|    |     |    |       |        |      |       |    |   |
|----|-----|----|-------|--------|------|-------|----|---|
| 3  | 142 | 80 | 15    | 153.74 | 32.4 | 0.2   | 63 | 0 |
| 0  | 141 | 84 | 26    | 153.74 | 32.4 | 0.433 | 22 | 0 |
| 0  | 141 | 84 | 26    | 153.74 | 32.4 | 0.433 | 22 | 0 |
| 0  | 141 | 84 | 26    | 153.74 | 32.4 | 0.433 | 22 | 0 |
| 8  | 154 | 78 | 32    | 153.74 | 32.4 | 0.443 | 45 | 1 |
| 8  | 154 | 78 | 32    | 153.74 | 32.4 | 0.443 | 45 | 1 |
| 8  | 154 | 78 | 32    | 153.74 | 32.4 | 0.443 | 45 | 1 |
| 2  | 110 | 74 | 29    | 125    | 32.4 | 0.698 | 27 | 0 |
| 2  | 110 | 74 | 29    | 125    | 32.4 | 0.698 | 27 | 0 |
| 7  | 133 | 88 | 15    | 155    | 32.4 | 0.262 | 37 | 0 |
| 7  | 133 | 88 | 15    | 155    | 32.4 | 0.262 | 37 | 0 |
| 3  | 128 | 72 | 25    | 190    | 32.4 | 0.549 | 27 | 1 |
| 3  | 128 | 72 | 25    | 190    | 32.4 | 0.549 | 27 | 1 |
| 3  | 78  | 70 | 29.34 | 153.74 | 32.5 | 0.27  | 39 | 0 |
| 3  | 78  | 70 | 29.34 | 153.74 | 32.5 | 0.27  | 39 | 0 |
| 4  | 145 | 82 | 18    | 153.74 | 32.5 | 0.235 | 70 | 1 |
| 4  | 145 | 82 | 18    | 153.74 | 32.5 | 0.235 | 70 | 1 |
| 4  | 145 | 82 | 18    | 153.74 | 32.5 | 0.235 | 70 | 1 |
| 3  | 148 | 66 | 25    | 153.74 | 32.5 | 0.256 | 22 | 0 |
| 3  | 148 | 66 | 25    | 153.74 | 32.5 | 0.256 | 22 | 0 |
| 3  | 148 | 66 | 25    | 153.74 | 32.5 | 0.256 | 22 | 0 |
| 6  | 105 | 80 | 28    | 153.74 | 32.5 | 0.878 | 26 | 0 |
| 6  | 105 | 80 | 28    | 153.74 | 32.5 | 0.878 | 26 | 0 |
| 6  | 105 | 80 | 28    | 153.74 | 32.5 | 0.878 | 26 | 0 |
| 0  | 109 | 88 | 30    | 153.74 | 32.5 | 0.855 | 38 | 1 |
| 0  | 109 | 88 | 30    | 153.74 | 32.5 | 0.855 | 38 | 1 |
| 2  | 108 | 52 | 26    | 63     | 32.5 | 0.318 | 22 | 0 |
| 2  | 108 | 52 | 26    | 63     | 32.5 | 0.318 | 22 | 0 |
| 2  | 108 | 52 | 26    | 63     | 32.5 | 0.318 | 22 | 0 |
| 7  | 62  | 78 | 29.34 | 153.74 | 32.6 | 0.391 | 41 | 0 |
| 7  | 62  | 78 | 29.34 | 153.74 | 32.6 | 0.391 | 41 | 0 |
| 9  | 140 | 94 | 29.34 | 153.74 | 32.7 | 0.734 | 45 | 1 |
| 9  | 140 | 94 | 29.34 | 153.74 | 32.7 | 0.734 | 45 | 1 |
| 9  | 140 | 94 | 29.34 | 153.74 | 32.7 | 0.734 | 45 | 1 |
| 2  | 87  | 58 | 16    | 52     | 32.7 | 0.166 | 25 | 0 |
| 2  | 87  | 58 | 16    | 52     | 32.7 | 0.166 | 25 | 0 |
| 8  | 179 | 72 | 42    | 130    | 32.7 | 0.719 | 36 | 1 |
| 8  | 179 | 72 | 42    | 130    | 32.7 | 0.719 | 36 | 1 |
| 8  | 179 | 72 | 42    | 130    | 32.7 | 0.719 | 36 | 1 |
| 13 | 76  | 60 | 29.34 | 153.74 | 32.8 | 0.18  | 41 | 0 |
| 7  | 114 | 66 | 29.34 | 153.74 | 32.8 | 0.258 | 42 | 1 |
| 7  | 114 | 66 | 29.34 | 153.74 | 32.8 | 0.258 | 42 | 1 |
| 9  | 164 | 78 | 29.34 | 153.74 | 32.8 | 0.148 | 45 | 1 |
| 9  | 164 | 78 | 29.34 | 153.74 | 32.8 | 0.148 | 45 | 1 |
| 9  | 164 | 78 | 29.34 | 153.74 | 32.8 | 0.148 | 45 | 1 |
| 1  | 111 | 94 | 29.34 | 153.74 | 32.8 | 0.265 | 45 | 0 |
| 1  | 111 | 94 | 29.34 | 153.74 | 32.8 | 0.265 | 45 | 0 |
| 1  | 111 | 94 | 29.34 | 153.74 | 32.8 | 0.265 | 45 | 0 |
| 9  | 57  | 80 | 37    | 153.74 | 32.8 | 0.096 | 41 | 0 |
| 9  | 57  | 80 | 37    | 153.74 | 32.8 | 0.096 | 41 | 0 |
| 9  | 57  | 80 | 37    | 153.74 | 32.8 | 0.096 | 41 | 0 |

|    |     |      |       |        |      |       |    |   |
|----|-----|------|-------|--------|------|-------|----|---|
| 4  | 99  | 68   | 38    | 153.74 | 32.8 | 0.145 | 33 | 0 |
| 4  | 99  | 68   | 38    | 153.74 | 32.8 | 0.145 | 33 | 0 |
| 4  | 99  | 68   | 38    | 153.74 | 32.8 | 0.145 | 33 | 0 |
| 4  | 99  | 68   | 38    | 153.74 | 32.8 | 0.145 | 33 | 0 |
| 4  | 99  | 68   | 38    | 153.74 | 32.8 | 0.145 | 33 | 0 |
| 1  | 164 | 82   | 43    | 67     | 32.8 | 0.341 | 50 | 0 |
| 1  | 164 | 82   | 43    | 67     | 32.8 | 0.341 | 50 | 0 |
| 1  | 133 | 102  | 28    | 140    | 32.8 | 0.234 | 45 | 1 |
| 1  | 133 | 102  | 28    | 140    | 32.8 | 0.234 | 45 | 1 |
| 1  | 133 | 102  | 28    | 140    | 32.8 | 0.234 | 45 | 1 |
| 4  | 154 | 62   | 31    | 284    | 32.8 | 0.237 | 23 | 0 |
| 4  | 154 | 62   | 31    | 284    | 32.8 | 0.237 | 23 | 0 |
| 4  | 154 | 62   | 31    | 284    | 32.8 | 0.237 | 23 | 0 |
| 4  | 132 | 72.4 | 29.34 | 153.74 | 32.9 | 0.302 | 23 | 1 |
| 4  | 132 | 72.4 | 29.34 | 153.74 | 32.9 | 0.302 | 23 | 1 |
| 5  | 168 | 64   | 29.34 | 153.74 | 32.9 | 0.135 | 41 | 1 |
| 5  | 168 | 64   | 29.34 | 153.74 | 32.9 | 0.135 | 41 | 1 |
| 5  | 168 | 64   | 29.34 | 153.74 | 32.9 | 0.135 | 41 | 1 |
| 5  | 168 | 64   | 29.34 | 153.74 | 32.9 | 0.135 | 41 | 1 |
| 8  | 133 | 72   | 29.34 | 153.74 | 32.9 | 0.27  | 39 | 1 |
| 8  | 133 | 72   | 29.34 | 153.74 | 32.9 | 0.27  | 39 | 1 |
| 4  | 158 | 78   | 29.34 | 153.74 | 32.9 | 0.803 | 31 | 1 |
| 4  | 158 | 78   | 29.34 | 153.74 | 32.9 | 0.803 | 31 | 1 |
| 4  | 158 | 78   | 29.34 | 153.74 | 32.9 | 0.803 | 31 | 1 |
| 9  | 102 | 76   | 37    | 153.74 | 32.9 | 0.665 | 46 | 1 |
| 9  | 102 | 76   | 37    | 153.74 | 32.9 | 0.665 | 46 | 1 |
| 2  | 100 | 66   | 20    | 90     | 32.9 | 0.867 | 28 | 1 |
| 2  | 100 | 66   | 20    | 90     | 32.9 | 0.867 | 28 | 1 |
| 10 | 101 | 76   | 48    | 180    | 32.9 | 0.171 | 63 | 0 |
| 10 | 101 | 76   | 48    | 180    | 32.9 | 0.171 | 63 | 0 |
| 10 | 101 | 76   | 48    | 180    | 32.9 | 0.171 | 63 | 0 |
| 3  | 174 | 58   | 22    | 194    | 32.9 | 0.593 | 36 | 1 |
| 3  | 174 | 58   | 22    | 194    | 32.9 | 0.593 | 36 | 1 |
| 3  | 174 | 58   | 22    | 194    | 32.9 | 0.593 | 36 | 1 |
| 2  | 124 | 68   | 28    | 205    | 32.9 | 0.875 | 30 | 1 |
| 2  | 124 | 68   | 28    | 205    | 32.9 | 0.875 | 30 | 1 |
| 2  | 124 | 68   | 28    | 205    | 32.9 | 0.875 | 30 | 1 |
| 4  | 91  | 70   | 32    | 88     | 33.1 | 0.446 | 22 | 0 |
| 4  | 91  | 70   | 32    | 88     | 33.1 | 0.446 | 22 | 0 |
| 9  | 123 | 70   | 44    | 94     | 33.1 | 0.374 | 40 | 0 |
| 9  | 123 | 70   | 44    | 94     | 33.1 | 0.374 | 40 | 0 |
| 4  | 131 | 68   | 21    | 166    | 33.1 | 0.16  | 28 | 0 |
| 4  | 131 | 68   | 21    | 166    | 33.1 | 0.16  | 28 | 0 |
| 11 | 138 | 76   | 29.34 | 153.74 | 33.2 | 0.42  | 35 | 0 |
| 11 | 138 | 76   | 29.34 | 153.74 | 33.2 | 0.42  | 35 | 0 |
| 0  | 137 | 70   | 38    | 153.74 | 33.2 | 0.17  | 22 | 0 |
| 0  | 137 | 70   | 38    | 153.74 | 33.2 | 0.17  | 22 | 0 |
| 0  | 137 | 70   | 38    | 153.74 | 33.2 | 0.17  | 22 | 0 |
| 1  | 71  | 78   | 50    | 45     | 33.2 | 0.422 | 21 | 0 |
| 1  | 71  | 78   | 50    | 45     | 33.2 | 0.422 | 21 | 0 |
| 1  | 96  | 64   | 27    | 87     | 33.2 | 0.289 | 21 | 0 |

|    |     |    |       |        |      |       |    |   |
|----|-----|----|-------|--------|------|-------|----|---|
| 1  | 96  | 64 | 27    | 87     | 33.2 | 0.289 | 21 | 0 |
| 4  | 117 | 64 | 27    | 120    | 33.2 | 0.23  | 24 | 0 |
| 4  | 117 | 64 | 27    | 120    | 33.2 | 0.23  | 24 | 0 |
| 4  | 117 | 64 | 27    | 120    | 33.2 | 0.23  | 24 | 0 |
| 3  | 124 | 80 | 33    | 130    | 33.2 | 0.305 | 26 | 0 |
| 2  | 129 | 74 | 26    | 205    | 33.2 | 0.591 | 25 | 0 |
| 2  | 129 | 74 | 26    | 205    | 33.2 | 0.591 | 25 | 0 |
| 2  | 129 | 74 | 26    | 205    | 33.2 | 0.591 | 25 | 0 |
| 9  | 122 | 56 | 29.34 | 153.74 | 33.3 | 1.114 | 33 | 1 |
| 9  | 122 | 56 | 29.34 | 153.74 | 33.3 | 1.114 | 33 | 1 |
| 9  | 122 | 56 | 29.34 | 153.74 | 33.3 | 1.114 | 33 | 1 |
| 0  | 113 | 76 | 29.34 | 153.74 | 33.3 | 0.278 | 23 | 1 |
| 0  | 113 | 76 | 29.34 | 153.74 | 33.3 | 0.278 | 23 | 1 |
| 0  | 113 | 76 | 29.34 | 153.74 | 33.3 | 0.278 | 23 | 1 |
| 10 | 75  | 82 | 29.34 | 153.74 | 33.3 | 0.263 | 38 | 0 |
| 10 | 75  | 82 | 29.34 | 153.74 | 33.3 | 0.263 | 38 | 0 |
| 10 | 75  | 82 | 29.34 | 153.74 | 33.3 | 0.263 | 38 | 0 |
| 1  | 77  | 56 | 30    | 56     | 33.3 | 1.251 | 24 | 0 |
| 1  | 77  | 56 | 30    | 56     | 33.3 | 1.251 | 24 | 0 |
| 7  | 94  | 64 | 25    | 79     | 33.3 | 0.738 | 41 | 0 |
| 7  | 94  | 64 | 25    | 79     | 33.3 | 0.738 | 41 | 0 |
| 7  | 94  | 64 | 25    | 79     | 33.3 | 0.738 | 41 | 0 |
| 1  | 118 | 58 | 36    | 94     | 33.3 | 0.261 | 23 | 0 |
| 1  | 118 | 58 | 36    | 94     | 33.3 | 0.261 | 23 | 0 |
| 1  | 118 | 58 | 36    | 94     | 33.3 | 0.261 | 23 | 0 |
| 3  | 171 | 72 | 33    | 135    | 33.3 | 0.199 | 24 | 1 |
| 3  | 171 | 72 | 33    | 135    | 33.3 | 0.199 | 24 | 1 |
| 3  | 171 | 72 | 33    | 135    | 33.3 | 0.199 | 24 | 1 |
| 11 | 155 | 76 | 28    | 150    | 33.3 | 1.353 | 51 | 1 |
| 11 | 155 | 76 | 28    | 150    | 33.3 | 1.353 | 51 | 1 |
| 3  | 176 | 86 | 27    | 156    | 33.3 | 1.154 | 52 | 1 |
| 3  | 176 | 86 | 27    | 156    | 33.3 | 1.154 | 52 | 1 |
| 1  | 125 | 50 | 40    | 167    | 33.3 | 0.962 | 28 | 1 |
| 1  | 125 | 50 | 40    | 167    | 33.3 | 0.962 | 28 | 1 |
| 1  | 125 | 50 | 40    | 167    | 33.3 | 0.962 | 28 | 1 |
| 2  | 89  | 90 | 30    | 153.74 | 33.5 | 0.292 | 42 | 0 |
| 2  | 89  | 90 | 30    | 153.74 | 33.5 | 0.292 | 42 | 0 |
| 2  | 89  | 90 | 30    | 153.74 | 33.5 | 0.292 | 42 | 0 |
| 2  | 89  | 90 | 30    | 153.74 | 33.5 | 0.292 | 42 | 0 |
| 2  | 89  | 90 | 30    | 153.74 | 33.5 | 0.292 | 42 | 0 |
| 14 | 175 | 62 | 30    | 153.74 | 33.6 | 0.212 | 38 | 1 |
| 14 | 175 | 62 | 30    | 153.74 | 33.6 | 0.212 | 38 | 1 |
| 14 | 175 | 62 | 30    | 153.74 | 33.6 | 0.212 | 38 | 1 |
| 2  | 138 | 62 | 35    | 153.74 | 33.6 | 0.127 | 47 | 1 |
| 1  | 113 | 64 | 35    | 153.74 | 33.6 | 0.543 | 21 | 1 |
| 1  | 113 | 64 | 35    | 153.74 | 33.6 | 0.543 | 21 | 1 |
| 0  | 104 | 64 | 37    | 64     | 33.6 | 0.51  | 22 | 1 |
| 0  | 104 | 64 | 37    | 64     | 33.6 | 0.51  | 22 | 1 |
| 0  | 104 | 64 | 37    | 64     | 33.6 | 0.51  | 22 | 1 |
| 5  | 96  | 74 | 18    | 67     | 33.6 | 0.997 | 43 | 0 |
| 5  | 96  | 74 | 18    | 67     | 33.6 | 0.997 | 43 | 0 |

|   |     |      |       |        |      |       |    |   |
|---|-----|------|-------|--------|------|-------|----|---|
| 2 | 107 | 74   | 30    | 100    | 33.6 | 0.404 | 23 | 0 |
| 2 | 107 | 74   | 30    | 100    | 33.6 | 0.404 | 23 | 0 |
| 2 | 107 | 74   | 30    | 100    | 33.6 | 0.404 | 23 | 0 |
| 6 | 165 | 68   | 26    | 168    | 33.6 | 0.631 | 49 | 0 |
| 6 | 165 | 68   | 26    | 168    | 33.6 | 0.631 | 49 | 0 |
| 6 | 165 | 68   | 26    | 168    | 33.6 | 0.631 | 49 | 0 |
| 6 | 123 | 72   | 45    | 230    | 33.6 | 0.733 | 34 | 0 |
| 6 | 123 | 72   | 45    | 230    | 33.6 | 0.733 | 34 | 0 |
| 5 | 78  | 48   | 29.34 | 153.74 | 33.7 | 0.654 | 25 | 0 |
| 5 | 78  | 48   | 29.34 | 153.74 | 33.7 | 0.654 | 25 | 0 |
| 5 | 78  | 48   | 29.34 | 153.74 | 33.7 | 0.654 | 25 | 0 |
| 5 | 147 | 78   | 29.34 | 153.74 | 33.7 | 0.218 | 65 | 0 |
| 5 | 147 | 78   | 29.34 | 153.74 | 33.7 | 0.218 | 65 | 0 |
| 5 | 147 | 78   | 29.34 | 153.74 | 33.7 | 0.218 | 65 | 0 |
| 6 | 115 | 60   | 39    | 153.74 | 33.7 | 0.245 | 40 | 1 |
| 6 | 115 | 60   | 39    | 153.74 | 33.7 | 0.245 | 40 | 1 |
| 6 | 115 | 60   | 39    | 153.74 | 33.7 | 0.245 | 40 | 1 |
| 2 | 105 | 80   | 45    | 191    | 33.7 | 0.711 | 29 | 1 |
| 2 | 105 | 80   | 45    | 191    | 33.7 | 0.711 | 29 | 1 |
| 2 | 105 | 80   | 45    | 191    | 33.7 | 0.711 | 29 | 1 |
| 8 | 176 | 90   | 34    | 300    | 33.7 | 0.467 | 58 | 1 |
| 8 | 176 | 90   | 34    | 300    | 33.7 | 0.467 | 58 | 1 |
| 0 | 117 | 72.4 | 29.34 | 153.74 | 33.8 | 0.932 | 44 | 0 |
| 0 | 117 | 72.4 | 29.34 | 153.74 | 33.8 | 0.932 | 44 | 0 |
| 6 | 125 | 76   | 29.34 | 153.74 | 33.8 | 0.121 | 54 | 1 |
| 6 | 125 | 76   | 29.34 | 153.74 | 33.8 | 0.121 | 54 | 1 |
| 1 | 117 | 60   | 23    | 106    | 33.8 | 0.466 | 27 | 0 |
| 1 | 117 | 60   | 23    | 106    | 33.8 | 0.466 | 27 | 0 |
| 1 | 117 | 60   | 23    | 106    | 33.8 | 0.466 | 27 | 0 |
| 2 | 125 | 60   | 20    | 140    | 33.8 | 0.088 | 31 | 0 |
| 2 | 125 | 60   | 20    | 140    | 33.8 | 0.088 | 31 | 0 |
| 2 | 125 | 60   | 20    | 140    | 33.8 | 0.088 | 31 | 0 |
| 3 | 173 | 78   | 39    | 185    | 33.8 | 0.97  | 31 | 1 |
| 3 | 173 | 78   | 39    | 185    | 33.8 | 0.97  | 31 | 1 |
| 3 | 173 | 78   | 39    | 185    | 33.8 | 0.97  | 31 | 1 |
| 6 | 144 | 72   | 27    | 228    | 33.9 | 0.255 | 40 | 0 |
| 6 | 144 | 72   | 27    | 228    | 33.9 | 0.255 | 40 | 0 |
| 7 | 187 | 50   | 33    | 392    | 33.9 | 0.826 | 34 | 1 |
| 7 | 187 | 50   | 33    | 392    | 33.9 | 0.826 | 34 | 1 |
| 7 | 187 | 50   | 33    | 392    | 33.9 | 0.826 | 34 | 1 |
| 4 | 76  | 62   | 29.34 | 153.74 | 34   | 0.391 | 25 | 0 |
| 4 | 76  | 62   | 29.34 | 153.74 | 34   | 0.391 | 25 | 0 |
| 4 | 76  | 62   | 29.34 | 153.74 | 34   | 0.391 | 25 | 0 |
| 5 | 124 | 74   | 29.34 | 153.74 | 34   | 0.22  | 38 | 1 |
| 5 | 124 | 74   | 29.34 | 153.74 | 34   | 0.22  | 38 | 1 |
| 5 | 124 | 74   | 29.34 | 153.74 | 34   | 0.22  | 38 | 1 |
| 3 | 180 | 64   | 25    | 70     | 34   | 0.271 | 26 | 0 |
| 3 | 180 | 64   | 25    | 70     | 34   | 0.271 | 26 | 0 |
| 5 | 99  | 54   | 28    | 83     | 34   | 0.499 | 30 | 0 |
| 5 | 99  | 54   | 28    | 83     | 34   | 0.499 | 30 | 0 |
| 5 | 99  | 54   | 28    | 83     | 34   | 0.499 | 30 | 0 |



|    |     |     |       |        |      |       |    |   |
|----|-----|-----|-------|--------|------|-------|----|---|
| 6  | 98  | 58  | 33    | 190    | 34   | 0.43  | 43 | 0 |
| 6  | 98  | 58  | 33    | 190    | 34   | 0.43  | 43 | 0 |
| 6  | 98  | 58  | 33    | 190    | 34   | 0.43  | 43 | 0 |
| 8  | 155 | 62  | 26    | 495    | 34   | 0.543 | 46 | 1 |
| 8  | 155 | 62  | 26    | 495    | 34   | 0.543 | 46 | 1 |
| 8  | 155 | 62  | 26    | 495    | 34   | 0.543 | 46 | 1 |
| 5  | 123 | 74  | 40    | 77     | 34.1 | 0.269 | 28 | 0 |
| 5  | 123 | 74  | 40    | 77     | 34.1 | 0.269 | 28 | 0 |
| 5  | 123 | 74  | 40    | 77     | 34.1 | 0.269 | 28 | 0 |
| 2  | 112 | 68  | 22    | 94     | 34.1 | 0.315 | 26 | 0 |
| 2  | 112 | 68  | 22    | 94     | 34.1 | 0.315 | 26 | 0 |
| 2  | 112 | 68  | 22    | 94     | 34.1 | 0.315 | 26 | 0 |
| 1  | 181 | 64  | 30    | 180    | 34.1 | 0.328 | 38 | 1 |
| 1  | 181 | 64  | 30    | 180    | 34.1 | 0.328 | 38 | 1 |
| 1  | 181 | 64  | 30    | 180    | 34.1 | 0.328 | 38 | 1 |
| 1  | 181 | 64  | 30    | 180    | 34.1 | 0.328 | 38 | 1 |
| 13 | 106 | 70  | 29.34 | 153.74 | 34.2 | 0.251 | 52 | 0 |
| 13 | 106 | 70  | 29.34 | 153.74 | 34.2 | 0.251 | 52 | 0 |
| 9  | 130 | 70  | 29.34 | 153.74 | 34.2 | 0.652 | 45 | 1 |
| 7  | 179 | 95  | 31    | 153.74 | 34.2 | 0.164 | 60 | 0 |
| 7  | 179 | 95  | 31    | 153.74 | 34.2 | 0.164 | 60 | 0 |
| 6  | 111 | 64  | 39    | 153.74 | 34.2 | 0.26  | 24 | 0 |
| 6  | 111 | 64  | 39    | 153.74 | 34.2 | 0.26  | 24 | 0 |
| 6  | 111 | 64  | 39    | 153.74 | 34.2 | 0.26  | 24 | 0 |
| 3  | 80  | 82  | 31    | 70     | 34.2 | 1.292 | 27 | 1 |
| 3  | 80  | 82  | 31    | 70     | 34.2 | 1.292 | 27 | 1 |
| 3  | 80  | 82  | 31    | 70     | 34.2 | 1.292 | 27 | 1 |
| 1  | 106 | 70  | 28    | 135    | 34.2 | 0.142 | 22 | 0 |
| 1  | 106 | 70  | 28    | 135    | 34.2 | 0.142 | 22 | 0 |
| 1  | 106 | 70  | 28    | 135    | 34.2 | 0.142 | 22 | 0 |
| 9  | 152 | 78  | 34    | 171    | 34.2 | 0.893 | 33 | 1 |
| 9  | 152 | 78  | 34    | 171    | 34.2 | 0.893 | 33 | 1 |
| 9  | 112 | 82  | 32    | 175    | 34.2 | 0.26  | 36 | 1 |
| 9  | 112 | 82  | 32    | 175    | 34.2 | 0.26  | 36 | 1 |
| 4  | 128 | 70  | 29.34 | 153.74 | 34.3 | 0.303 | 24 | 0 |
| 4  | 128 | 70  | 29.34 | 153.74 | 34.3 | 0.303 | 24 | 0 |
| 4  | 128 | 70  | 29.34 | 153.74 | 34.3 | 0.303 | 24 | 0 |
| 0  | 189 | 104 | 25    | 153.74 | 34.3 | 0.435 | 41 | 1 |
| 0  | 189 | 104 | 25    | 153.74 | 34.3 | 0.435 | 41 | 1 |
| 0  | 189 | 104 | 25    | 153.74 | 34.3 | 0.435 | 41 | 1 |
| 0  | 131 | 66  | 40    | 153.74 | 34.3 | 0.196 | 22 | 1 |
| 0  | 131 | 66  | 40    | 153.74 | 34.3 | 0.196 | 22 | 1 |
| 0  | 131 | 66  | 40    | 153.74 | 34.3 | 0.196 | 22 | 1 |
| 3  | 83  | 58  | 31    | 18     | 34.3 | 0.336 | 25 | 0 |
| 3  | 83  | 58  | 31    | 18     | 34.3 | 0.336 | 25 | 0 |
| 3  | 83  | 58  | 31    | 18     | 34.3 | 0.336 | 25 | 0 |
| 9  | 156 | 86  | 28    | 155    | 34.3 | 1.189 | 42 | 1 |
| 9  | 156 | 86  | 28    | 155    | 34.3 | 1.189 | 42 | 1 |
| 9  | 156 | 86  | 28    | 155    | 34.3 | 1.189 | 42 | 1 |
| 0  | 121 | 66  | 30    | 165    | 34.3 | 0.203 | 33 | 1 |
| 0  | 121 | 66  | 30    | 165    | 34.3 | 0.203 | 33 | 1 |

|   |     |    |       |        |      |       |    |   |
|---|-----|----|-------|--------|------|-------|----|---|
| 3 | 132 | 80 | 29.34 | 153.74 | 34.4 | 0.402 | 44 | 1 |
| 3 | 132 | 80 | 29.34 | 153.74 | 34.4 | 0.402 | 44 | 1 |
| 3 | 61  | 82 | 28    | 153.74 | 34.4 | 0.243 | 46 | 0 |
| 3 | 61  | 82 | 28    | 153.74 | 34.4 | 0.243 | 46 | 0 |
| 3 | 61  | 82 | 28    | 153.74 | 34.4 | 0.243 | 46 | 0 |
| 1 | 112 | 72 | 30    | 176    | 34.4 | 0.528 | 25 | 0 |
| 1 | 112 | 72 | 30    | 176    | 34.4 | 0.528 | 25 | 0 |
| 1 | 112 | 72 | 30    | 176    | 34.4 | 0.528 | 25 | 0 |
| 1 | 112 | 72 | 30    | 176    | 34.4 | 0.528 | 25 | 0 |
| 2 | 127 | 46 | 21    | 335    | 34.4 | 0.176 | 22 | 0 |
| 2 | 127 | 46 | 21    | 335    | 34.4 | 0.176 | 22 | 0 |
| 2 | 127 | 46 | 21    | 335    | 34.4 | 0.176 | 22 | 0 |
| 0 | 102 | 78 | 40    | 90     | 34.5 | 0.238 | 24 | 0 |
| 0 | 102 | 78 | 40    | 90     | 34.5 | 0.238 | 24 | 0 |
| 0 | 102 | 78 | 40    | 90     | 34.5 | 0.238 | 24 | 0 |
| 1 | 117 | 88 | 24    | 145    | 34.5 | 0.403 | 40 | 1 |
| 1 | 117 | 88 | 24    | 145    | 34.5 | 0.403 | 40 | 1 |
| 1 | 117 | 88 | 24    | 145    | 34.5 | 0.403 | 40 | 1 |
| 4 | 127 | 88 | 11    | 155    | 34.5 | 0.598 | 28 | 0 |
| 4 | 127 | 88 | 11    | 155    | 34.5 | 0.598 | 28 | 0 |
| 4 | 127 | 88 | 11    | 155    | 34.5 | 0.598 | 28 | 0 |
| 8 | 186 | 90 | 35    | 225    | 34.5 | 0.423 | 37 | 1 |
| 8 | 186 | 90 | 35    | 225    | 34.5 | 0.423 | 37 | 1 |
| 3 | 170 | 64 | 37    | 225    | 34.5 | 0.356 | 30 | 1 |
| 3 | 170 | 64 | 37    | 225    | 34.5 | 0.356 | 30 | 1 |
| 3 | 170 | 64 | 37    | 225    | 34.5 | 0.356 | 30 | 1 |
| 5 | 128 | 80 | 29.34 | 153.74 | 34.6 | 0.144 | 45 | 0 |
| 5 | 128 | 80 | 29.34 | 153.74 | 34.6 | 0.144 | 45 | 0 |
| 5 | 128 | 80 | 29.34 | 153.74 | 34.6 | 0.144 | 45 | 0 |
| 1 | 87  | 78 | 27    | 32     | 34.6 | 0.101 | 22 | 0 |
| 1 | 87  | 78 | 27    | 32     | 34.6 | 0.101 | 22 | 0 |
| 0 | 138 | 60 | 35    | 167    | 34.6 | 0.534 | 21 | 1 |
| 0 | 138 | 60 | 35    | 167    | 34.6 | 0.534 | 21 | 1 |
| 0 | 138 | 60 | 35    | 167    | 34.6 | 0.534 | 21 | 1 |
| 0 | 138 | 60 | 35    | 167    | 34.6 | 0.534 | 21 | 1 |
| 0 | 177 | 60 | 29    | 478    | 34.6 | 1.072 | 21 | 1 |
| 0 | 177 | 60 | 29    | 478    | 34.6 | 1.072 | 21 | 1 |
| 5 | 122 | 86 | 29.34 | 153.74 | 34.7 | 0.29  | 33 | 0 |
| 5 | 122 | 86 | 29.34 | 153.74 | 34.7 | 0.29  | 33 | 0 |
| 5 | 122 | 86 | 29.34 | 153.74 | 34.7 | 0.29  | 33 | 0 |
| 2 | 197 | 70 | 99    | 153.74 | 34.7 | 0.575 | 62 | 1 |
| 2 | 197 | 70 | 99    | 153.74 | 34.7 | 0.575 | 62 | 1 |
| 2 | 98  | 60 | 17    | 120    | 34.7 | 0.198 | 22 | 0 |
| 2 | 98  | 60 | 17    | 120    | 34.7 | 0.198 | 22 | 0 |
| 7 | 150 | 66 | 42    | 342    | 34.7 | 0.718 | 42 | 0 |
| 7 | 150 | 66 | 42    | 342    | 34.7 | 0.718 | 42 | 0 |
| 4 | 109 | 64 | 44    | 99     | 34.8 | 0.905 | 26 | 1 |
| 4 | 109 | 64 | 44    | 99     | 34.8 | 0.905 | 26 | 1 |
| 1 | 112 | 80 | 45    | 132    | 34.8 | 0.217 | 24 | 0 |
| 1 | 112 | 80 | 45    | 132    | 34.8 | 0.217 | 24 | 0 |
| 1 | 112 | 80 | 45    | 132    | 34.8 | 0.217 | 24 | 0 |

|    |     |    |       |        |      |       |    |   |
|----|-----|----|-------|--------|------|-------|----|---|
| 8  | 143 | 66 | 29.34 | 153.74 | 34.9 | 0.129 | 41 | 1 |
| 8  | 143 | 66 | 29.34 | 153.74 | 34.9 | 0.129 | 41 | 1 |
| 3  | 193 | 70 | 31    | 153.74 | 34.9 | 0.241 | 25 | 1 |
| 3  | 193 | 70 | 31    | 153.74 | 34.9 | 0.241 | 25 | 1 |
| 3  | 193 | 70 | 31    | 153.74 | 34.9 | 0.241 | 25 | 1 |
| 3  | 193 | 70 | 31    | 153.74 | 34.9 | 0.241 | 25 | 1 |
| 10 | 90  | 85 | 32    | 153.74 | 34.9 | 0.825 | 56 | 1 |
| 10 | 90  | 85 | 32    | 153.74 | 34.9 | 0.825 | 56 | 1 |
| 0  | 119 | 64 | 18    | 92     | 34.9 | 0.725 | 23 | 0 |
| 0  | 119 | 64 | 18    | 92     | 34.9 | 0.725 | 23 | 0 |
| 2  | 105 | 58 | 40    | 94     | 34.9 | 0.225 | 25 | 0 |
| 2  | 105 | 58 | 40    | 94     | 34.9 | 0.225 | 25 | 0 |
| 2  | 105 | 58 | 40    | 94     | 34.9 | 0.225 | 25 | 0 |
| 4  | 147 | 74 | 25    | 293    | 34.9 | 0.385 | 30 | 0 |
| 4  | 147 | 74 | 25    | 293    | 34.9 | 0.385 | 30 | 0 |
| 4  | 147 | 74 | 25    | 293    | 34.9 | 0.385 | 30 | 0 |
| 4  | 122 | 68 | 29.34 | 153.74 | 35   | 0.394 | 29 | 0 |
| 4  | 122 | 68 | 29.34 | 153.74 | 35   | 0.394 | 29 | 0 |
| 1  | 168 | 88 | 29    | 153.74 | 35   | 0.905 | 52 | 1 |
| 1  | 168 | 88 | 29    | 153.74 | 35   | 0.905 | 52 | 1 |
| 1  | 168 | 88 | 29    | 153.74 | 35   | 0.905 | 52 | 1 |
| 5  | 136 | 84 | 41    | 88     | 35   | 0.286 | 35 | 1 |
| 5  | 136 | 84 | 41    | 88     | 35   | 0.286 | 35 | 1 |
| 5  | 136 | 84 | 41    | 88     | 35   | 0.286 | 35 | 1 |
| 5  | 136 | 84 | 41    | 88     | 35   | 0.286 | 35 | 1 |
| 1  | 95  | 82 | 25    | 180    | 35   | 0.233 | 43 | 1 |
| 1  | 95  | 82 | 25    | 180    | 35   | 0.233 | 43 | 1 |
| 1  | 95  | 82 | 25    | 180    | 35   | 0.233 | 43 | 1 |
| 1  | 95  | 82 | 25    | 180    | 35   | 0.233 | 43 | 1 |
| 10 | 179 | 70 | 29.34 | 153.74 | 35.1 | 0.2   | 37 | 0 |
| 10 | 179 | 70 | 29.34 | 153.74 | 35.1 | 0.2   | 37 | 0 |
| 10 | 179 | 70 | 29.34 | 153.74 | 35.1 | 0.2   | 37 | 0 |
| 1  | 122 | 64 | 32    | 156    | 35.1 | 0.692 | 30 | 1 |
| 1  | 122 | 64 | 32    | 156    | 35.1 | 0.692 | 30 | 1 |
| 1  | 122 | 64 | 32    | 156    | 35.1 | 0.692 | 30 | 1 |
| 4  | 129 | 86 | 20    | 270    | 35.1 | 0.231 | 23 | 0 |
| 4  | 129 | 86 | 20    | 270    | 35.1 | 0.231 | 23 | 0 |
| 0  | 123 | 88 | 37    | 153.74 | 35.2 | 0.197 | 29 | 0 |
| 0  | 123 | 88 | 37    | 153.74 | 35.2 | 0.197 | 29 | 0 |
| 0  | 123 | 88 | 37    | 153.74 | 35.2 | 0.197 | 29 | 0 |
| 7  | 150 | 78 | 29    | 126    | 35.2 | 0.692 | 54 | 1 |
| 7  | 150 | 78 | 29    | 126    | 35.2 | 0.692 | 54 | 1 |
| 7  | 150 | 78 | 29    | 126    | 35.2 | 0.692 | 54 | 1 |
| 0  | 93  | 60 | 29.34 | 153.74 | 35.3 | 0.263 | 25 | 0 |
| 0  | 93  | 60 | 29.34 | 153.74 | 35.3 | 0.263 | 25 | 0 |
| 0  | 93  | 60 | 29.34 | 153.74 | 35.3 | 0.263 | 25 | 0 |
| 8  | 74  | 70 | 40    | 49     | 35.3 | 0.705 | 39 | 0 |
| 8  | 74  | 70 | 40    | 49     | 35.3 | 0.705 | 39 | 0 |
| 8  | 74  | 70 | 40    | 49     | 35.3 | 0.705 | 39 | 0 |
| 12 | 88  | 74 | 40    | 54     | 35.3 | 0.378 | 48 | 0 |
| 12 | 88  | 74 | 40    | 54     | 35.3 | 0.378 | 48 | 0 |

|    |     |     |       |        |      |       |    |   |
|----|-----|-----|-------|--------|------|-------|----|---|
| 12 | 88  | 74  | 40    | 54     | 35.3 | 0.378 | 48 | 0 |
| 4  | 95  | 60  | 32    | 153.74 | 35.4 | 0.284 | 28 | 0 |
| 4  | 95  | 60  | 32    | 153.74 | 35.4 | 0.284 | 28 | 0 |
| 4  | 95  | 60  | 32    | 153.74 | 35.4 | 0.284 | 28 | 0 |
| 6  | 134 | 70  | 23    | 130    | 35.4 | 0.542 | 29 | 1 |
| 6  | 134 | 70  | 23    | 130    | 35.4 | 0.542 | 29 | 1 |
| 6  | 134 | 70  | 23    | 130    | 35.4 | 0.542 | 29 | 1 |
| 9  | 124 | 70  | 33    | 402    | 35.4 | 0.282 | 34 | 0 |
| 9  | 124 | 70  | 33    | 402    | 35.4 | 0.282 | 34 | 0 |
| 6  | 190 | 92  | 29.34 | 153.74 | 35.5 | 0.278 | 66 | 1 |
| 6  | 190 | 92  | 29.34 | 153.74 | 35.5 | 0.278 | 66 | 1 |
| 6  | 190 | 92  | 29.34 | 153.74 | 35.5 | 0.278 | 66 | 1 |
| 7  | 184 | 84  | 33    | 153.74 | 35.5 | 0.355 | 41 | 1 |
| 7  | 184 | 84  | 33    | 153.74 | 35.5 | 0.355 | 41 | 1 |
| 10 | 68  | 106 | 23    | 49     | 35.5 | 0.285 | 47 | 0 |
| 10 | 68  | 106 | 23    | 49     | 35.5 | 0.285 | 47 | 0 |
| 10 | 68  | 106 | 23    | 49     | 35.5 | 0.285 | 47 | 0 |
| 1  | 119 | 44  | 47    | 63     | 35.5 | 0.28  | 25 | 0 |
| 1  | 119 | 44  | 47    | 63     | 35.5 | 0.28  | 25 | 0 |
| 6  | 151 | 62  | 31    | 120    | 35.5 | 0.692 | 28 | 0 |
| 6  | 151 | 62  | 31    | 120    | 35.5 | 0.692 | 28 | 0 |
| 1  | 108 | 60  | 46    | 178    | 35.5 | 0.415 | 24 | 0 |
| 1  | 108 | 60  | 46    | 178    | 35.5 | 0.415 | 24 | 0 |
| 1  | 108 | 60  | 46    | 178    | 35.5 | 0.415 | 24 | 0 |
| 3  | 158 | 70  | 30    | 328    | 35.5 | 0.344 | 35 | 1 |
| 3  | 158 | 70  | 30    | 328    | 35.5 | 0.344 | 35 | 1 |
| 3  | 158 | 70  | 30    | 328    | 35.5 | 0.344 | 35 | 1 |
| 8  | 91  | 82  | 29.34 | 153.74 | 35.6 | 0.587 | 68 | 0 |
| 8  | 91  | 82  | 29.34 | 153.74 | 35.6 | 0.587 | 68 | 0 |
| 8  | 91  | 82  | 29.34 | 153.74 | 35.6 | 0.587 | 68 | 0 |
| 5  | 97  | 76  | 27    | 153.74 | 35.6 | 0.378 | 52 | 1 |
| 5  | 97  | 76  | 27    | 153.74 | 35.6 | 0.378 | 52 | 1 |
| 5  | 97  | 76  | 27    | 153.74 | 35.6 | 0.378 | 52 | 1 |
| 0  | 101 | 76  | 29.34 | 153.74 | 35.7 | 0.198 | 26 | 0 |
| 0  | 101 | 76  | 29.34 | 153.74 | 35.7 | 0.198 | 26 | 0 |
| 2  | 112 | 75  | 32    | 153.74 | 35.7 | 0.148 | 21 | 0 |
| 2  | 112 | 75  | 32    | 153.74 | 35.7 | 0.148 | 21 | 0 |
| 2  | 112 | 75  | 32    | 153.74 | 35.7 | 0.148 | 21 | 0 |
| 6  | 102 | 90  | 39    | 153.74 | 35.7 | 0.674 | 28 | 0 |
| 6  | 102 | 90  | 39    | 153.74 | 35.7 | 0.674 | 28 | 0 |
| 6  | 102 | 90  | 39    | 153.74 | 35.7 | 0.674 | 28 | 0 |
| 6  | 102 | 90  | 39    | 153.74 | 35.7 | 0.674 | 28 | 0 |
| 3  | 173 | 84  | 33    | 474    | 35.7 | 0.258 | 22 | 1 |
| 3  | 173 | 84  | 33    | 474    | 35.7 | 0.258 | 22 | 1 |
| 3  | 173 | 84  | 33    | 474    | 35.7 | 0.258 | 22 | 1 |
| 3  | 173 | 84  | 33    | 474    | 35.7 | 0.258 | 22 | 1 |
| 1  | 124 | 60  | 32    | 153.74 | 35.8 | 0.514 | 21 | 0 |
| 1  | 124 | 60  | 32    | 153.74 | 35.8 | 0.514 | 21 | 0 |
| 1  | 124 | 60  | 32    | 153.74 | 35.8 | 0.514 | 21 | 0 |
| 0  | 86  | 68  | 32    | 153.74 | 35.8 | 0.238 | 25 | 0 |
| 0  | 86  | 68  | 32    | 153.74 | 35.8 | 0.238 | 25 | 0 |

|    |     |      |       |        |      |       |    |   |
|----|-----|------|-------|--------|------|-------|----|---|
| 5  | 77  | 82   | 41    | 42     | 35.8 | 0.156 | 35 | 0 |
| 5  | 77  | 82   | 41    | 42     | 35.8 | 0.156 | 35 | 0 |
| 5  | 77  | 82   | 41    | 42     | 35.8 | 0.156 | 35 | 0 |
| 0  | 84  | 64   | 22    | 66     | 35.8 | 0.545 | 21 | 0 |
| 0  | 84  | 64   | 22    | 66     | 35.8 | 0.545 | 21 | 0 |
| 0  | 84  | 64   | 22    | 66     | 35.8 | 0.545 | 21 | 0 |
| 5  | 109 | 62   | 41    | 129    | 35.8 | 0.514 | 25 | 1 |
| 5  | 109 | 62   | 41    | 129    | 35.8 | 0.514 | 25 | 1 |
| 7  | 194 | 68   | 28    | 153.74 | 35.9 | 0.745 | 41 | 1 |
| 7  | 194 | 68   | 28    | 153.74 | 35.9 | 0.745 | 41 | 1 |
| 7  | 109 | 80   | 31    | 153.74 | 35.9 | 1.127 | 43 | 1 |
| 7  | 109 | 80   | 31    | 153.74 | 35.9 | 1.127 | 43 | 1 |
| 7  | 109 | 80   | 31    | 153.74 | 35.9 | 1.127 | 43 | 1 |
| 10 | 129 | 76   | 28    | 122    | 35.9 | 0.28  | 39 | 0 |
| 10 | 129 | 76   | 28    | 122    | 35.9 | 0.28  | 39 | 0 |
| 7  | 181 | 84   | 21    | 192    | 35.9 | 0.586 | 51 | 1 |
| 7  | 181 | 84   | 21    | 192    | 35.9 | 0.586 | 51 | 1 |
| 2  | 122 | 76   | 27    | 200    | 35.9 | 0.483 | 26 | 0 |
| 2  | 122 | 76   | 27    | 200    | 35.9 | 0.483 | 26 | 0 |
| 2  | 122 | 76   | 27    | 200    | 35.9 | 0.483 | 26 | 0 |
| 3  | 121 | 52   | 29.34 | 153.74 | 36   | 0.127 | 25 | 1 |
| 3  | 121 | 52   | 29.34 | 153.74 | 36   | 0.127 | 25 | 1 |
| 3  | 121 | 52   | 29.34 | 153.74 | 36   | 0.127 | 25 | 1 |
| 5  | 108 | 72   | 43    | 75     | 36.1 | 0.263 | 33 | 0 |
| 5  | 108 | 72   | 43    | 75     | 36.1 | 0.263 | 33 | 0 |
| 11 | 138 | 74   | 26    | 144    | 36.1 | 0.557 | 50 | 1 |
| 11 | 138 | 74   | 26    | 144    | 36.1 | 0.557 | 50 | 1 |
| 11 | 138 | 74   | 26    | 144    | 36.1 | 0.557 | 50 | 1 |
| 1  | 116 | 78   | 29    | 180    | 36.1 | 0.496 | 25 | 0 |
| 1  | 116 | 78   | 29    | 180    | 36.1 | 0.496 | 25 | 0 |
| 1  | 116 | 78   | 29    | 180    | 36.1 | 0.496 | 25 | 0 |
| 2  | 122 | 52   | 43    | 158    | 36.2 | 0.816 | 28 | 0 |
| 2  | 122 | 52   | 43    | 158    | 36.2 | 0.816 | 28 | 0 |
| 2  | 122 | 52   | 43    | 158    | 36.2 | 0.816 | 28 | 0 |
| 0  | 138 | 72.4 | 29.34 | 153.74 | 36.3 | 0.933 | 25 | 1 |
| 0  | 138 | 72.4 | 29.34 | 153.74 | 36.3 | 0.933 | 25 | 1 |
| 0  | 123 | 72   | 29.34 | 153.74 | 36.3 | 0.258 | 52 | 1 |
| 0  | 123 | 72   | 29.34 | 153.74 | 36.3 | 0.258 | 52 | 1 |
| 0  | 123 | 72   | 29.34 | 153.74 | 36.3 | 0.258 | 52 | 1 |
| 0  | 127 | 80   | 37    | 210    | 36.3 | 0.804 | 23 | 0 |
| 0  | 127 | 80   | 37    | 210    | 36.3 | 0.804 | 23 | 0 |
| 3  | 129 | 92   | 49    | 155    | 36.4 | 0.968 | 32 | 1 |
| 3  | 129 | 92   | 49    | 155    | 36.4 | 0.968 | 32 | 1 |
| 3  | 187 | 70   | 22    | 200    | 36.4 | 0.408 | 36 | 1 |
| 3  | 187 | 70   | 22    | 200    | 36.4 | 0.408 | 36 | 1 |
| 3  | 187 | 70   | 22    | 200    | 36.4 | 0.408 | 36 | 1 |
| 0  | 180 | 90   | 26    | 90     | 36.5 | 0.314 | 35 | 1 |
| 0  | 180 | 90   | 26    | 90     | 36.5 | 0.314 | 35 | 1 |
| 0  | 180 | 90   | 26    | 90     | 36.5 | 0.314 | 35 | 1 |
| 0  | 95  | 80   | 45    | 92     | 36.5 | 0.33  | 26 | 0 |
| 0  | 95  | 80   | 45    | 92     | 36.5 | 0.33  | 26 | 0 |

|    |     |    |       |        |      |       |    |   |
|----|-----|----|-------|--------|------|-------|----|---|
| 0  | 95  | 80 | 45    | 92     | 36.5 | 0.33  | 26 | 0 |
| 1  | 128 | 88 | 39    | 110    | 36.5 | 1.057 | 37 | 1 |
| 1  | 128 | 88 | 39    | 110    | 36.5 | 1.057 | 37 | 1 |
| 1  | 128 | 88 | 39    | 110    | 36.5 | 1.057 | 37 | 1 |
| 1  | 196 | 76 | 36    | 249    | 36.5 | 0.875 | 29 | 1 |
| 1  | 196 | 76 | 36    | 249    | 36.5 | 0.875 | 29 | 1 |
| 1  | 196 | 76 | 36    | 249    | 36.5 | 0.875 | 29 | 1 |
| 13 | 106 | 72 | 54    | 153.74 | 36.6 | 0.178 | 45 | 0 |
| 13 | 106 | 72 | 54    | 153.74 | 36.6 | 0.178 | 45 | 0 |
| 0  | 107 | 62 | 30    | 74     | 36.6 | 0.757 | 25 | 1 |
| 0  | 107 | 62 | 30    | 74     | 36.6 | 0.757 | 25 | 1 |
| 2  | 99  | 60 | 17    | 160    | 36.6 | 0.453 | 21 | 0 |
| 2  | 99  | 60 | 17    | 160    | 36.6 | 0.453 | 21 | 0 |
| 2  | 99  | 60 | 17    | 160    | 36.6 | 0.453 | 21 | 0 |
| 14 | 100 | 78 | 25    | 184    | 36.6 | 0.412 | 46 | 1 |
| 14 | 100 | 78 | 25    | 184    | 36.6 | 0.412 | 46 | 1 |
| 14 | 100 | 78 | 25    | 184    | 36.6 | 0.412 | 46 | 1 |
| 14 | 100 | 78 | 25    | 184    | 36.6 | 0.412 | 46 | 1 |
| 4  | 197 | 70 | 39    | 744    | 36.7 | 2.329 | 31 | 0 |
| 4  | 197 | 70 | 39    | 744    | 36.7 | 2.329 | 31 | 0 |
| 8  | 95  | 72 | 29.34 | 153.74 | 36.8 | 0.485 | 57 | 0 |
| 8  | 95  | 72 | 29.34 | 153.74 | 36.8 | 0.485 | 57 | 0 |
| 8  | 95  | 72 | 29.34 | 153.74 | 36.8 | 0.485 | 57 | 0 |
| 1  | 173 | 74 | 29.34 | 153.74 | 36.8 | 0.088 | 38 | 1 |
| 1  | 173 | 74 | 29.34 | 153.74 | 36.8 | 0.088 | 38 | 1 |
| 1  | 173 | 74 | 29.34 | 153.74 | 36.8 | 0.088 | 38 | 1 |
| 6  | 107 | 88 | 29.34 | 153.74 | 36.8 | 0.727 | 31 | 0 |
| 6  | 107 | 88 | 29.34 | 153.74 | 36.8 | 0.727 | 31 | 0 |
| 6  | 107 | 88 | 29.34 | 153.74 | 36.8 | 0.727 | 31 | 0 |
| 2  | 122 | 70 | 27    | 153.74 | 36.8 | 0.34  | 27 | 0 |
| 2  | 122 | 70 | 27    | 153.74 | 36.8 | 0.34  | 27 | 0 |
| 2  | 122 | 70 | 27    | 153.74 | 36.8 | 0.34  | 27 | 0 |
| 2  | 83  | 65 | 28    | 66     | 36.8 | 0.629 | 24 | 0 |
| 2  | 83  | 65 | 28    | 66     | 36.8 | 0.629 | 24 | 0 |
| 2  | 83  | 65 | 28    | 66     | 36.8 | 0.629 | 24 | 0 |
| 2  | 83  | 65 | 28    | 66     | 36.8 | 0.629 | 24 | 0 |
| 2  | 83  | 65 | 28    | 66     | 36.8 | 0.629 | 24 | 0 |
| 0  | 97  | 64 | 36    | 100    | 36.8 | 0.6   | 25 | 0 |
| 0  | 97  | 64 | 36    | 100    | 36.8 | 0.6   | 25 | 0 |
| 0  | 97  | 64 | 36    | 100    | 36.8 | 0.6   | 25 | 0 |
| 0  | 78  | 88 | 29    | 40     | 36.9 | 0.434 | 21 | 0 |
| 0  | 78  | 88 | 29    | 40     | 36.9 | 0.434 | 21 | 0 |
| 1  | 84  | 64 | 23    | 115    | 36.9 | 0.471 | 28 | 0 |
| 1  | 84  | 64 | 23    | 115    | 36.9 | 0.471 | 28 | 0 |
| 5  | 105 | 72 | 29    | 325    | 36.9 | 0.159 | 28 | 0 |
| 5  | 105 | 72 | 29    | 325    | 36.9 | 0.159 | 28 | 0 |
| 5  | 105 | 72 | 29    | 325    | 36.9 | 0.159 | 28 | 0 |
| 4  | 184 | 78 | 39    | 277    | 37   | 0.264 | 31 | 1 |
| 4  | 184 | 78 | 39    | 277    | 37   | 0.264 | 31 | 1 |
| 4  | 184 | 78 | 39    | 277    | 37   | 0.264 | 31 | 1 |
| 4  | 184 | 78 | 39    | 277    | 37   | 0.264 | 31 | 1 |

|    |     |     |       |        |      |       |    |   |
|----|-----|-----|-------|--------|------|-------|----|---|
| 15 | 136 | 70  | 32    | 110    | 37.1 | 0.153 | 43 | 1 |
| 15 | 136 | 70  | 32    | 110    | 37.1 | 0.153 | 43 | 1 |
| 4  | 111 | 72  | 47    | 207    | 37.1 | 1.39  | 56 | 1 |
| 4  | 111 | 72  | 47    | 207    | 37.1 | 1.39  | 56 | 1 |
| 3  | 84  | 72  | 32    | 153.74 | 37.2 | 0.267 | 28 | 0 |
| 3  | 84  | 72  | 32    | 153.74 | 37.2 | 0.267 | 28 | 0 |
| 3  | 84  | 72  | 32    | 153.74 | 37.2 | 0.267 | 28 | 0 |
| 3  | 162 | 52  | 38    | 153.74 | 37.2 | 0.652 | 24 | 1 |
| 3  | 162 | 52  | 38    | 153.74 | 37.2 | 0.652 | 24 | 1 |
| 1  | 87  | 60  | 37    | 75     | 37.2 | 0.509 | 22 | 0 |
| 1  | 87  | 60  | 37    | 75     | 37.2 | 0.509 | 22 | 0 |
| 1  | 87  | 60  | 37    | 75     | 37.2 | 0.509 | 22 | 0 |
| 7  | 102 | 74  | 40    | 105    | 37.2 | 0.204 | 45 | 0 |
| 7  | 102 | 74  | 40    | 105    | 37.2 | 0.204 | 45 | 0 |
| 7  | 102 | 74  | 40    | 105    | 37.2 | 0.204 | 45 | 0 |
| 3  | 96  | 78  | 39    | 153.74 | 37.3 | 0.238 | 40 | 0 |
| 3  | 96  | 78  | 39    | 153.74 | 37.3 | 0.238 | 40 | 0 |
| 3  | 96  | 78  | 39    | 153.74 | 37.3 | 0.238 | 40 | 0 |
| 12 | 140 | 85  | 33    | 153.74 | 37.4 | 0.244 | 41 | 0 |
| 12 | 140 | 85  | 33    | 153.74 | 37.4 | 0.244 | 41 | 0 |
| 12 | 140 | 85  | 33    | 153.74 | 37.4 | 0.244 | 41 | 0 |
| 0  | 95  | 85  | 25    | 36     | 37.4 | 0.247 | 24 | 1 |
| 0  | 95  | 85  | 25    | 36     | 37.4 | 0.247 | 24 | 1 |
| 0  | 95  | 85  | 25    | 36     | 37.4 | 0.247 | 24 | 1 |
| 1  | 136 | 74  | 50    | 204    | 37.4 | 0.399 | 24 | 0 |
| 1  | 136 | 74  | 50    | 204    | 37.4 | 0.399 | 24 | 0 |
| 1  | 136 | 74  | 50    | 204    | 37.4 | 0.399 | 24 | 0 |
| 1  | 106 | 76  | 29.34 | 153.74 | 37.5 | 0.197 | 26 | 0 |
| 1  | 106 | 76  | 29.34 | 153.74 | 37.5 | 0.197 | 26 | 0 |
| 1  | 106 | 76  | 29.34 | 153.74 | 37.5 | 0.197 | 26 | 0 |
| 8  | 196 | 76  | 29    | 280    | 37.5 | 0.605 | 57 | 1 |
| 8  | 196 | 76  | 29    | 280    | 37.5 | 0.605 | 57 | 1 |
| 7  | 125 | 86  | 29.34 | 153.74 | 37.6 | 0.304 | 51 | 0 |
| 1  | 87  | 68  | 34    | 77     | 37.6 | 0.401 | 24 | 0 |
| 1  | 87  | 68  | 34    | 77     | 37.6 | 0.401 | 24 | 0 |
| 8  | 167 | 106 | 46    | 231    | 37.6 | 0.165 | 43 | 1 |
| 8  | 167 | 106 | 46    | 231    | 37.6 | 0.165 | 43 | 1 |
| 8  | 167 | 106 | 46    | 231    | 37.6 | 0.165 | 43 | 1 |
| 10 | 148 | 84  | 48    | 237    | 37.6 | 1.001 | 51 | 1 |
| 10 | 148 | 84  | 48    | 237    | 37.6 | 1.001 | 51 | 1 |
| 10 | 148 | 84  | 48    | 237    | 37.6 | 1.001 | 51 | 1 |
| 5  | 162 | 104 | 29.34 | 153.74 | 37.7 | 0.151 | 52 | 1 |
| 5  | 162 | 104 | 29.34 | 153.74 | 37.7 | 0.151 | 52 | 1 |
| 5  | 95  | 72  | 33    | 153.74 | 37.7 | 0.37  | 27 | 0 |
| 5  | 95  | 72  | 33    | 153.74 | 37.7 | 0.37  | 27 | 0 |
| 4  | 90  | 88  | 47    | 54     | 37.7 | 0.362 | 29 | 0 |
| 4  | 90  | 88  | 47    | 54     | 37.7 | 0.362 | 29 | 0 |
| 4  | 90  | 88  | 47    | 54     | 37.7 | 0.362 | 29 | 0 |
| 6  | 103 | 72  | 32    | 190    | 37.7 | 0.324 | 55 | 0 |
| 6  | 103 | 72  | 32    | 190    | 37.7 | 0.324 | 55 | 0 |
| 7  | 187 | 68  | 39    | 304    | 37.7 | 0.254 | 41 | 1 |

|   |     |      |       |        |      |       |    |   |
|---|-----|------|-------|--------|------|-------|----|---|
| 7 | 187 | 68   | 39    | 304    | 37.7 | 0.254 | 41 | 1 |
| 5 | 112 | 66   | 29.34 | 153.74 | 37.8 | 0.261 | 41 | 1 |
| 5 | 112 | 66   | 29.34 | 153.74 | 37.8 | 0.261 | 41 | 1 |
| 2 | 100 | 54   | 28    | 105    | 37.8 | 0.498 | 24 | 0 |
| 2 | 100 | 54   | 28    | 105    | 37.8 | 0.498 | 24 | 0 |
| 2 | 100 | 54   | 28    | 105    | 37.8 | 0.498 | 24 | 0 |
| 0 | 179 | 50   | 36    | 159    | 37.8 | 0.455 | 22 | 1 |
| 0 | 179 | 50   | 36    | 159    | 37.8 | 0.455 | 22 | 1 |
| 0 | 179 | 50   | 36    | 159    | 37.8 | 0.455 | 22 | 1 |
| 0 | 146 | 70   | 29.34 | 153.74 | 37.9 | 0.334 | 28 | 1 |
| 0 | 146 | 70   | 29.34 | 153.74 | 37.9 | 0.334 | 28 | 1 |
| 9 | 145 | 80   | 46    | 130    | 37.9 | 0.637 | 40 | 1 |
| 9 | 145 | 80   | 46    | 130    | 37.9 | 0.637 | 40 | 1 |
| 9 | 145 | 80   | 46    | 130    | 37.9 | 0.637 | 40 | 1 |
| 2 | 93  | 64   | 32    | 160    | 38   | 0.674 | 23 | 1 |
| 2 | 93  | 64   | 32    | 160    | 38   | 0.674 | 23 | 1 |
| 2 | 93  | 64   | 32    | 160    | 38   | 0.674 | 23 | 1 |
| 1 | 97  | 70   | 40    | 153.74 | 38.1 | 0.218 | 30 | 0 |
| 1 | 97  | 70   | 40    | 153.74 | 38.1 | 0.218 | 30 | 0 |
| 3 | 115 | 66   | 39    | 140    | 38.1 | 0.15  | 28 | 0 |
| 3 | 115 | 66   | 39    | 140    | 38.1 | 0.15  | 28 | 0 |
| 3 | 115 | 66   | 39    | 140    | 38.1 | 0.15  | 28 | 0 |
| 1 | 114 | 66   | 36    | 200    | 38.1 | 0.289 | 21 | 0 |
| 1 | 114 | 66   | 36    | 200    | 38.1 | 0.289 | 21 | 0 |
| 1 | 114 | 66   | 36    | 200    | 38.1 | 0.289 | 21 | 0 |
| 2 | 90  | 68   | 42    | 153.74 | 38.2 | 0.503 | 27 | 1 |
| 2 | 90  | 68   | 42    | 153.74 | 38.2 | 0.503 | 27 | 1 |
| 0 | 84  | 82   | 31    | 125    | 38.2 | 0.233 | 23 | 0 |
| 0 | 84  | 82   | 31    | 125    | 38.2 | 0.233 | 23 | 0 |
| 0 | 84  | 82   | 31    | 125    | 38.2 | 0.233 | 23 | 0 |
| 0 | 84  | 82   | 31    | 125    | 38.2 | 0.233 | 23 | 0 |
| 2 | 146 | 76   | 35    | 194    | 38.2 | 0.329 | 29 | 0 |
| 2 | 146 | 76   | 35    | 194    | 38.2 | 0.329 | 29 | 0 |
| 7 | 168 | 88   | 42    | 321    | 38.2 | 0.787 | 40 | 1 |
| 7 | 168 | 88   | 42    | 321    | 38.2 | 0.787 | 40 | 1 |
| 7 | 168 | 88   | 42    | 321    | 38.2 | 0.787 | 40 | 1 |
| 8 | 84  | 74   | 31    | 153.74 | 38.3 | 0.457 | 39 | 0 |
| 8 | 84  | 74   | 31    | 153.74 | 38.3 | 0.457 | 39 | 0 |
| 8 | 84  | 74   | 31    | 153.74 | 38.3 | 0.457 | 39 | 0 |
| 2 | 142 | 94   | 59    | 177    | 38.3 | 0.62  | 63 | 1 |
| 2 | 142 | 94   | 59    | 177    | 38.3 | 0.62  | 63 | 1 |
| 2 | 112 | 86   | 42    | 160    | 38.4 | 0.246 | 28 | 0 |
| 2 | 112 | 86   | 42    | 160    | 38.4 | 0.246 | 28 | 0 |
| 2 | 112 | 86   | 42    | 160    | 38.4 | 0.246 | 28 | 0 |
| 3 | 173 | 82   | 48    | 465    | 38.4 | 2.137 | 25 | 1 |
| 3 | 173 | 82   | 48    | 465    | 38.4 | 2.137 | 25 | 1 |
| 3 | 173 | 82   | 48    | 465    | 38.4 | 2.137 | 25 | 1 |
| 2 | 129 | 72.4 | 29.34 | 153.74 | 38.5 | 0.304 | 41 | 0 |
| 2 | 129 | 72.4 | 29.34 | 153.74 | 38.5 | 0.304 | 41 | 0 |
| 2 | 129 | 72.4 | 29.34 | 153.74 | 38.5 | 0.304 | 41 | 0 |
| 4 | 146 | 78   | 29.34 | 153.74 | 38.5 | 0.52  | 67 | 1 |



|    |        |     |       |        |      |       |    |   |
|----|--------|-----|-------|--------|------|-------|----|---|
| 4  | 146    | 78  | 29.34 | 153.74 | 38.5 | 0.52  | 67 | 1 |
| 4  | 146    | 78  | 29.34 | 153.74 | 38.5 | 0.52  | 67 | 1 |
| 4  | 144    | 82  | 32    | 153.74 | 38.5 | 0.554 | 37 | 1 |
| 4  | 144    | 82  | 32    | 153.74 | 38.5 | 0.554 | 37 | 1 |
| 4  | 144    | 82  | 32    | 153.74 | 38.5 | 0.554 | 37 | 1 |
| 4  | 144    | 82  | 32    | 153.74 | 38.5 | 0.554 | 37 | 1 |
| 2  | 100    | 68  | 25    | 71     | 38.5 | 0.324 | 26 | 0 |
| 2  | 100    | 68  | 25    | 71     | 38.5 | 0.324 | 26 | 0 |
| 8  | 126    | 88  | 36    | 108    | 38.5 | 0.349 | 49 | 0 |
| 8  | 126    | 88  | 36    | 108    | 38.5 | 0.349 | 49 | 0 |
| 8  | 126    | 88  | 36    | 108    | 38.5 | 0.349 | 49 | 0 |
| 7  | 129    | 68  | 49    | 125    | 38.5 | 0.439 | 43 | 1 |
| 7  | 129    | 68  | 49    | 125    | 38.5 | 0.439 | 43 | 1 |
| 7  | 129    | 68  | 49    | 125    | 38.5 | 0.439 | 43 | 1 |
| 1  | 99     | 72  | 30    | 18     | 38.6 | 0.412 | 21 | 0 |
| 1  | 99     | 72  | 30    | 18     | 38.6 | 0.412 | 21 | 0 |
| 8  | 100    | 76  | 29.34 | 153.74 | 38.7 | 0.19  | 42 | 0 |
| 8  | 100    | 76  | 29.34 | 153.74 | 38.7 | 0.19  | 42 | 0 |
| 2  | 155    | 52  | 27    | 540    | 38.7 | 0.24  | 25 | 1 |
| 2  | 155    | 52  | 27    | 540    | 38.7 | 0.24  | 25 | 1 |
| 2  | 155    | 52  | 27    | 540    | 38.7 | 0.24  | 25 | 1 |
| 5  | 155    | 84  | 44    | 545    | 38.7 | 0.619 | 34 | 0 |
| 5  | 155    | 84  | 44    | 545    | 38.7 | 0.619 | 34 | 0 |
| 0  | 119    | 66  | 27    | 153.74 | 38.8 | 0.259 | 22 | 0 |
| 0  | 119    | 66  | 27    | 153.74 | 38.8 | 0.259 | 22 | 0 |
| 0  | 119    | 66  | 27    | 153.74 | 38.8 | 0.259 | 22 | 0 |
| 1  | 120    | 80  | 48    | 200    | 38.9 | 1.162 | 41 | 0 |
| 1  | 120    | 80  | 48    | 200    | 38.9 | 1.162 | 41 | 0 |
| 1  | 120    | 80  | 48    | 200    | 38.9 | 1.162 | 41 | 0 |
| 1  | 163    | 72  | 29.34 | 153.74 | 39   | 1.222 | 33 | 1 |
| 1  | 163    | 72  | 29.34 | 153.74 | 39   | 1.222 | 33 | 1 |
| 1  | 163    | 72  | 29.34 | 153.74 | 39   | 1.222 | 33 | 1 |
| 11 | 127    | 106 | 29.34 | 153.74 | 39   | 0.19  | 51 | 0 |
| 11 | 127    | 106 | 29.34 | 153.74 | 39   | 0.19  | 51 | 0 |
| 11 | 127    | 106 | 29.34 | 153.74 | 39   | 0.19  | 51 | 0 |
| 6  | 121.98 | 68  | 41    | 153.74 | 39   | 0.727 | 41 | 1 |
| 6  | 121.98 | 68  | 41    | 153.74 | 39   | 0.727 | 41 | 1 |
| 6  | 121.98 | 68  | 41    | 153.74 | 39   | 0.727 | 41 | 1 |
| 1  | 121    | 78  | 39    | 74     | 39   | 0.261 | 28 | 0 |
| 1  | 121    | 78  | 39    | 74     | 39   | 0.261 | 28 | 0 |
| 1  | 121    | 78  | 39    | 74     | 39   | 0.261 | 28 | 0 |
| 5  | 130    | 82  | 29.34 | 153.74 | 39.1 | 0.956 | 37 | 1 |
| 5  | 130    | 82  | 29.34 | 153.74 | 39.1 | 0.956 | 37 | 1 |
| 7  | 103    | 66  | 32    | 153.74 | 39.1 | 0.344 | 31 | 1 |
| 7  | 103    | 66  | 32    | 153.74 | 39.1 | 0.344 | 31 | 1 |
| 2  | 121    | 70  | 32    | 95     | 39.1 | 0.886 | 23 | 0 |
| 2  | 121    | 70  | 32    | 95     | 39.1 | 0.886 | 23 | 0 |
| 2  | 121    | 70  | 32    | 95     | 39.1 | 0.886 | 23 | 0 |
| 5  | 117    | 86  | 30    | 105    | 39.1 | 0.251 | 42 | 0 |
| 5  | 117    | 86  | 30    | 105    | 39.1 | 0.251 | 42 | 0 |
| 5  | 117    | 86  | 30    | 105    | 39.1 | 0.251 | 42 | 0 |

|    |     |      |       |        |      |       |    |   |
|----|-----|------|-------|--------|------|-------|----|---|
| 5  | 103 | 108  | 37    | 153.74 | 39.2 | 0.305 | 65 | 0 |
| 5  | 103 | 108  | 37    | 153.74 | 39.2 | 0.305 | 65 | 0 |
| 5  | 103 | 108  | 37    | 153.74 | 39.2 | 0.305 | 65 | 0 |
| 12 | 140 | 82   | 43    | 325    | 39.2 | 0.528 | 58 | 1 |
| 12 | 140 | 82   | 43    | 325    | 39.2 | 0.528 | 58 | 1 |
| 12 | 140 | 82   | 43    | 325    | 39.2 | 0.528 | 58 | 1 |
| 4  | 112 | 78   | 40    | 153.74 | 39.4 | 0.236 | 38 | 0 |
| 4  | 112 | 78   | 40    | 153.74 | 39.4 | 0.236 | 38 | 0 |
| 4  | 112 | 78   | 40    | 153.74 | 39.4 | 0.236 | 38 | 0 |
| 2  | 112 | 78   | 50    | 140    | 39.4 | 0.175 | 24 | 0 |
| 2  | 112 | 78   | 50    | 140    | 39.4 | 0.175 | 24 | 0 |
| 0  | 106 | 70   | 37    | 148    | 39.4 | 0.605 | 22 | 0 |
| 0  | 106 | 70   | 37    | 148    | 39.4 | 0.605 | 22 | 0 |
| 0  | 106 | 70   | 37    | 148    | 39.4 | 0.605 | 22 | 0 |
| 5  | 158 | 84   | 41    | 210    | 39.4 | 0.395 | 29 | 1 |
| 5  | 158 | 84   | 41    | 210    | 39.4 | 0.395 | 29 | 1 |
| 8  | 100 | 74   | 40    | 215    | 39.4 | 0.661 | 43 | 1 |
| 8  | 100 | 74   | 40    | 215    | 39.4 | 0.661 | 43 | 1 |
| 2  | 157 | 74   | 35    | 440    | 39.4 | 0.134 | 30 | 0 |
| 2  | 157 | 74   | 35    | 440    | 39.4 | 0.134 | 30 | 0 |
| 2  | 157 | 74   | 35    | 440    | 39.4 | 0.134 | 30 | 0 |
| 1  | 102 | 74   | 29.34 | 153.74 | 39.5 | 0.293 | 42 | 1 |
| 1  | 102 | 74   | 29.34 | 153.74 | 39.5 | 0.293 | 42 | 1 |
| 1  | 102 | 74   | 29.34 | 153.74 | 39.5 | 0.293 | 42 | 1 |
| 5  | 106 | 82   | 30    | 153.74 | 39.5 | 0.286 | 38 | 0 |
| 5  | 106 | 82   | 30    | 153.74 | 39.5 | 0.286 | 38 | 0 |
| 5  | 106 | 82   | 30    | 153.74 | 39.5 | 0.286 | 38 | 0 |
| 4  | 84  | 90   | 23    | 56     | 39.5 | 0.159 | 25 | 0 |
| 4  | 84  | 90   | 23    | 56     | 39.5 | 0.159 | 25 | 0 |
| 2  | 85  | 65   | 29.34 | 153.74 | 39.6 | 0.93  | 27 | 0 |
| 2  | 85  | 65   | 29.34 | 153.74 | 39.6 | 0.93  | 27 | 0 |
| 2  | 85  | 65   | 29.34 | 153.74 | 39.6 | 0.93  | 27 | 0 |
| 2  | 120 | 76   | 37    | 105    | 39.7 | 0.215 | 29 | 0 |
| 2  | 120 | 76   | 37    | 105    | 39.7 | 0.215 | 29 | 0 |
| 2  | 120 | 76   | 37    | 105    | 39.7 | 0.215 | 29 | 0 |
| 6  | 80  | 80   | 36    | 153.74 | 39.8 | 0.177 | 28 | 0 |
| 6  | 80  | 80   | 36    | 153.74 | 39.8 | 0.177 | 28 | 0 |
| 6  | 80  | 80   | 36    | 153.74 | 39.8 | 0.177 | 28 | 0 |
| 7  | 178 | 84   | 29.34 | 153.74 | 39.9 | 0.331 | 41 | 1 |
| 7  | 178 | 84   | 29.34 | 153.74 | 39.9 | 0.331 | 41 | 1 |
| 7  | 178 | 84   | 29.34 | 153.74 | 39.9 | 0.331 | 41 | 1 |
| 13 | 129 | 72.4 | 30    | 153.74 | 39.9 | 0.569 | 44 | 1 |
| 13 | 129 | 72.4 | 30    | 153.74 | 39.9 | 0.569 | 44 | 1 |
| 13 | 129 | 72.4 | 30    | 153.74 | 39.9 | 0.569 | 44 | 1 |
| 0  | 91  | 68   | 32    | 210    | 39.9 | 0.381 | 25 | 0 |
| 0  | 91  | 68   | 32    | 210    | 39.9 | 0.381 | 25 | 0 |
| 0  | 91  | 68   | 32    | 210    | 39.9 | 0.381 | 25 | 0 |
| 2  | 128 | 64   | 42    | 153.74 | 40   | 1.101 | 24 | 0 |
| 2  | 128 | 64   | 42    | 153.74 | 40   | 1.101 | 24 | 0 |
| 1  | 181 | 78   | 42    | 293    | 40   | 1.258 | 22 | 1 |
| 1  | 181 | 78   | 42    | 293    | 40   | 1.258 | 22 | 1 |

|    |        |    |       |        |      |       |    |   |
|----|--------|----|-------|--------|------|-------|----|---|
| 1  | 181    | 78 | 42    | 293    | 40   | 1.258 | 22 | 1 |
| 1  | 138    | 82 | 29.34 | 153.74 | 40.1 | 0.236 | 28 | 0 |
| 1  | 138    | 82 | 29.34 | 153.74 | 40.1 | 0.236 | 28 | 0 |
| 7  | 133    | 84 | 29.34 | 153.74 | 40.2 | 0.696 | 37 | 0 |
| 7  | 133    | 84 | 29.34 | 153.74 | 40.2 | 0.696 | 37 | 0 |
| 0  | 116    | 64 | 39    | 225    | 40.2 | 0.72  | 50 | 0 |
| 0  | 116    | 64 | 39    | 225    | 40.2 | 0.72  | 50 | 0 |
| 0  | 146    | 82 | 29.34 | 153.74 | 40.5 | 1.781 | 44 | 0 |
| 0  | 146    | 82 | 29.34 | 153.74 | 40.5 | 1.781 | 44 | 0 |
| 2  | 100    | 70 | 52    | 57     | 40.5 | 0.677 | 25 | 0 |
| 2  | 100    | 70 | 52    | 57     | 40.5 | 0.677 | 25 | 0 |
| 1  | 128    | 48 | 45    | 194    | 40.5 | 0.613 | 24 | 1 |
| 1  | 128    | 48 | 45    | 194    | 40.5 | 0.613 | 24 | 1 |
| 0  | 102    | 64 | 46    | 78     | 40.6 | 0.496 | 21 | 0 |
| 0  | 102    | 64 | 46    | 78     | 40.6 | 0.496 | 21 | 0 |
| 0  | 102    | 64 | 46    | 78     | 40.6 | 0.496 | 21 | 0 |
| 0  | 102    | 64 | 46    | 78     | 40.6 | 0.496 | 21 | 0 |
| 13 | 153    | 88 | 37    | 140    | 40.6 | 1.174 | 39 | 0 |
| 13 | 153    | 88 | 37    | 140    | 40.6 | 1.174 | 39 | 0 |
| 13 | 153    | 88 | 37    | 140    | 40.6 | 1.174 | 39 | 0 |
| 0  | 135    | 94 | 46    | 145    | 40.6 | 0.284 | 26 | 0 |
| 0  | 135    | 94 | 46    | 145    | 40.6 | 0.284 | 26 | 0 |
| 0  | 135    | 94 | 46    | 145    | 40.6 | 0.284 | 26 | 0 |
| 0  | 135    | 94 | 46    | 145    | 40.6 | 0.284 | 26 | 0 |
| 1  | 153    | 82 | 42    | 485    | 40.6 | 0.687 | 23 | 0 |
| 1  | 153    | 82 | 42    | 485    | 40.6 | 0.687 | 23 | 0 |
| 1  | 153    | 82 | 42    | 485    | 40.6 | 0.687 | 23 | 0 |
| 0  | 163    | 40 | 23    | 64     | 40.7 | 0.322 | 33 | 0 |
| 0  | 163    | 40 | 23    | 64     | 40.7 | 0.322 | 33 | 0 |
| 1  | 139    | 62 | 41    | 480    | 40.7 | 0.536 | 21 | 0 |
| 1  | 139    | 62 | 41    | 480    | 40.7 | 0.536 | 21 | 0 |
| 1  | 139    | 62 | 41    | 480    | 40.7 | 0.536 | 21 | 0 |
| 1  | 139    | 62 | 41    | 480    | 40.7 | 0.536 | 21 | 0 |
| 6  | 183    | 94 | 29.34 | 153.74 | 40.8 | 1.461 | 45 | 0 |
| 6  | 183    | 94 | 29.34 | 153.74 | 40.8 | 1.461 | 45 | 0 |
| 6  | 183    | 94 | 29.34 | 153.74 | 40.8 | 1.461 | 45 | 0 |
| 7  | 97     | 76 | 32    | 91     | 40.9 | 0.871 | 32 | 1 |
| 7  | 97     | 76 | 32    | 91     | 40.9 | 0.871 | 32 | 1 |
| 7  | 97     | 76 | 32    | 91     | 40.9 | 0.871 | 32 | 1 |
| 17 | 163    | 72 | 41    | 114    | 40.9 | 0.817 | 47 | 1 |
| 17 | 163    | 72 | 41    | 114    | 40.9 | 0.817 | 47 | 1 |
| 17 | 163    | 72 | 41    | 114    | 40.9 | 0.817 | 47 | 1 |
| 5  | 121.98 | 80 | 32    | 153.74 | 41   | 0.346 | 37 | 1 |
| 5  | 121.98 | 80 | 32    | 153.74 | 41   | 0.346 | 37 | 1 |
| 5  | 121.98 | 80 | 32    | 153.74 | 41   | 0.346 | 37 | 1 |
| 10 | 129    | 62 | 36    | 153.74 | 41.2 | 0.441 | 38 | 1 |
| 10 | 129    | 62 | 36    | 153.74 | 41.2 | 0.441 | 38 | 1 |
| 10 | 129    | 62 | 36    | 153.74 | 41.2 | 0.441 | 38 | 1 |
| 1  | 144    | 82 | 40    | 153.74 | 41.3 | 0.607 | 28 | 0 |
| 1  | 144    | 82 | 40    | 153.74 | 41.3 | 0.607 | 28 | 0 |
| 1  | 144    | 82 | 40    | 153.74 | 41.3 | 0.607 | 28 | 0 |

|    |     |      |       |        |      |       |    |   |
|----|-----|------|-------|--------|------|-------|----|---|
| 1  | 86  | 66   | 52    | 65     | 41.3 | 0.917 | 29 | 0 |
| 1  | 86  | 66   | 52    | 65     | 41.3 | 0.917 | 29 | 0 |
| 0  | 198 | 66   | 32    | 274    | 41.3 | 0.502 | 28 | 1 |
| 0  | 198 | 66   | 32    | 274    | 41.3 | 0.502 | 28 | 1 |
| 0  | 105 | 64   | 41    | 142    | 41.5 | 0.173 | 22 | 0 |
| 0  | 105 | 64   | 41    | 142    | 41.5 | 0.173 | 22 | 0 |
| 0  | 152 | 82   | 39    | 272    | 41.5 | 0.27  | 27 | 0 |
| 0  | 152 | 82   | 39    | 272    | 41.5 | 0.27  | 27 | 0 |
| 0  | 152 | 82   | 39    | 272    | 41.5 | 0.27  | 27 | 0 |
| 12 | 151 | 70   | 40    | 271    | 41.8 | 0.742 | 38 | 1 |
| 12 | 151 | 70   | 40    | 271    | 41.8 | 0.742 | 38 | 1 |
| 0  | 180 | 66   | 39    | 153.74 | 42   | 1.893 | 25 | 1 |
| 0  | 180 | 66   | 39    | 153.74 | 42   | 1.893 | 25 | 1 |
| 0  | 151 | 90   | 46    | 153.74 | 42.1 | 0.371 | 21 | 1 |
| 0  | 151 | 90   | 46    | 153.74 | 42.1 | 0.371 | 21 | 1 |
| 2  | 123 | 48   | 32    | 165    | 42.1 | 0.52  | 26 | 0 |
| 2  | 123 | 48   | 32    | 165    | 42.1 | 0.52  | 26 | 0 |
| 2  | 123 | 48   | 32    | 165    | 42.1 | 0.52  | 26 | 0 |
| 2  | 123 | 48   | 32    | 165    | 42.1 | 0.52  | 26 | 0 |
| 4  | 92  | 80   | 29.34 | 153.74 | 42.2 | 0.237 | 29 | 0 |
| 4  | 92  | 80   | 29.34 | 153.74 | 42.2 | 0.237 | 29 | 0 |
| 4  | 92  | 80   | 29.34 | 153.74 | 42.2 | 0.237 | 29 | 0 |
| 13 | 158 | 114  | 29.34 | 153.74 | 42.3 | 0.257 | 44 | 1 |
| 13 | 158 | 114  | 29.34 | 153.74 | 42.3 | 0.257 | 44 | 1 |
| 13 | 158 | 114  | 29.34 | 153.74 | 42.3 | 0.257 | 44 | 1 |
| 11 | 120 | 80   | 37    | 150    | 42.3 | 0.785 | 48 | 1 |
| 11 | 120 | 80   | 37    | 150    | 42.3 | 0.785 | 48 | 1 |
| 11 | 120 | 80   | 37    | 150    | 42.3 | 0.785 | 48 | 1 |
| 0  | 135 | 68   | 42    | 250    | 42.3 | 0.365 | 24 | 1 |
| 0  | 135 | 68   | 42    | 250    | 42.3 | 0.365 | 24 | 1 |
| 0  | 135 | 68   | 42    | 250    | 42.3 | 0.365 | 24 | 1 |
| 0  | 135 | 68   | 42    | 250    | 42.3 | 0.365 | 24 | 1 |
| 0  | 141 | 72.4 | 29.34 | 153.74 | 42.4 | 0.205 | 29 | 1 |
| 0  | 141 | 72.4 | 29.34 | 153.74 | 42.4 | 0.205 | 29 | 1 |
| 0  | 141 | 72.4 | 29.34 | 153.74 | 42.4 | 0.205 | 29 | 1 |
| 1  | 143 | 84   | 23    | 310    | 42.4 | 1.076 | 22 | 0 |
| 1  | 143 | 84   | 23    | 310    | 42.4 | 1.076 | 22 | 0 |
| 1  | 143 | 84   | 23    | 310    | 42.4 | 1.076 | 22 | 0 |
| 1  | 143 | 84   | 23    | 310    | 42.4 | 1.076 | 22 | 0 |
| 1  | 172 | 68   | 49    | 579    | 42.4 | 0.702 | 28 | 1 |
| 1  | 172 | 68   | 49    | 579    | 42.4 | 0.702 | 28 | 1 |
| 1  | 172 | 68   | 49    | 579    | 42.4 | 0.702 | 28 | 1 |
| 1  | 172 | 68   | 49    | 579    | 42.4 | 0.702 | 28 | 1 |
| 0  | 140 | 65   | 26    | 130    | 42.6 | 0.431 | 24 | 1 |
| 0  | 140 | 65   | 26    | 130    | 42.6 | 0.431 | 24 | 1 |
| 3  | 90  | 78   | 29.34 | 153.74 | 42.7 | 0.559 | 21 | 0 |
| 3  | 90  | 78   | 29.34 | 153.74 | 42.7 | 0.559 | 21 | 0 |
| 3  | 90  | 78   | 29.34 | 153.74 | 42.7 | 0.559 | 21 | 0 |
| 2  | 109 | 92   | 29.34 | 153.74 | 42.7 | 0.845 | 54 | 0 |
| 2  | 109 | 92   | 29.34 | 153.74 | 42.7 | 0.845 | 54 | 0 |
| 0  | 147 | 85   | 54    | 153.74 | 42.8 | 0.375 | 24 | 0 |

|    |     |      |       |        |      |       |    |   |
|----|-----|------|-------|--------|------|-------|----|---|
| 0  | 147 | 85   | 54    | 153.74 | 42.8 | 0.375 | 24 | 0 |
| 2  | 118 | 80   | 29.34 | 153.74 | 42.9 | 0.693 | 21 | 1 |
| 2  | 118 | 80   | 29.34 | 153.74 | 42.9 | 0.693 | 21 | 1 |
| 1  | 199 | 76   | 43    | 153.74 | 42.9 | 1.394 | 22 | 1 |
| 1  | 199 | 76   | 43    | 153.74 | 42.9 | 1.394 | 22 | 1 |
| 1  | 199 | 76   | 43    | 153.74 | 42.9 | 1.394 | 22 | 1 |
| 3  | 120 | 70   | 30    | 135    | 42.9 | 0.452 | 30 | 0 |
| 3  | 120 | 70   | 30    | 135    | 42.9 | 0.452 | 30 | 0 |
| 3  | 120 | 70   | 30    | 135    | 42.9 | 0.452 | 30 | 0 |
| 8  | 151 | 78   | 32    | 210    | 42.9 | 0.516 | 36 | 1 |
| 8  | 151 | 78   | 32    | 210    | 42.9 | 0.516 | 36 | 1 |
| 8  | 151 | 78   | 32    | 210    | 42.9 | 0.516 | 36 | 1 |
| 8  | 151 | 78   | 32    | 210    | 42.9 | 0.516 | 36 | 1 |
| 0  | 131 | 72.4 | 29.34 | 153.74 | 43.2 | 0.27  | 26 | 1 |
| 0  | 131 | 72.4 | 29.34 | 153.74 | 43.2 | 0.27  | 26 | 1 |
| 1  | 180 | 72.4 | 29.34 | 153.74 | 43.3 | 0.282 | 41 | 1 |
| 1  | 180 | 72.4 | 29.34 | 153.74 | 43.3 | 0.282 | 41 | 1 |
| 8  | 105 | 100  | 36    | 153.74 | 43.3 | 0.239 | 45 | 1 |
| 8  | 105 | 100  | 36    | 153.74 | 43.3 | 0.239 | 45 | 1 |
| 8  | 105 | 100  | 36    | 153.74 | 43.3 | 0.239 | 45 | 1 |
| 2  | 128 | 78   | 37    | 182    | 43.3 | 1.224 | 31 | 1 |
| 2  | 128 | 78   | 37    | 182    | 43.3 | 1.224 | 31 | 1 |
| 0  | 181 | 88   | 44    | 510    | 43.3 | 0.222 | 26 | 1 |
| 0  | 181 | 88   | 44    | 510    | 43.3 | 0.222 | 26 | 1 |
| 0  | 181 | 88   | 44    | 510    | 43.3 | 0.222 | 26 | 1 |
| 13 | 126 | 90   | 29.34 | 153.74 | 43.4 | 0.583 | 42 | 1 |
| 13 | 126 | 90   | 29.34 | 153.74 | 43.4 | 0.583 | 42 | 1 |
| 0  | 93  | 100  | 39    | 72     | 43.4 | 1.021 | 35 | 0 |
| 0  | 93  | 100  | 39    | 72     | 43.4 | 1.021 | 35 | 0 |
| 0  | 93  | 100  | 39    | 72     | 43.4 | 1.021 | 35 | 0 |
| 1  | 79  | 60   | 42    | 48     | 43.5 | 0.678 | 23 | 0 |
| 1  | 79  | 60   | 42    | 48     | 43.5 | 0.678 | 23 | 0 |
| 1  | 79  | 60   | 42    | 48     | 43.5 | 0.678 | 23 | 0 |
| 0  | 94  | 70   | 27    | 115    | 43.5 | 0.347 | 21 | 0 |
| 0  | 94  | 70   | 27    | 115    | 43.5 | 0.347 | 21 | 0 |
| 0  | 94  | 70   | 27    | 115    | 43.5 | 0.347 | 21 | 0 |
| 4  | 171 | 72   | 29.34 | 153.74 | 43.6 | 0.479 | 26 | 1 |
| 4  | 171 | 72   | 29.34 | 153.74 | 43.6 | 0.479 | 26 | 1 |
| 5  | 187 | 76   | 27    | 207    | 43.6 | 1.034 | 53 | 1 |
| 5  | 187 | 76   | 27    | 207    | 43.6 | 1.034 | 53 | 1 |
| 4  | 142 | 86   | 29.34 | 153.74 | 44   | 0.645 | 22 | 1 |
| 4  | 142 | 86   | 29.34 | 153.74 | 44   | 0.645 | 22 | 1 |
| 9  | 170 | 74   | 31    | 153.74 | 44   | 0.403 | 43 | 1 |
| 9  | 170 | 74   | 31    | 153.74 | 44   | 0.403 | 43 | 1 |
| 9  | 170 | 74   | 31    | 153.74 | 44   | 0.403 | 43 | 1 |
| 0  | 179 | 90   | 27    | 153.74 | 44.1 | 0.686 | 23 | 1 |
| 0  | 179 | 90   | 27    | 153.74 | 44.1 | 0.686 | 23 | 1 |
| 0  | 145 | 72.4 | 29.34 | 153.74 | 44.2 | 0.63  | 31 | 1 |
| 0  | 145 | 72.4 | 29.34 | 153.74 | 44.2 | 0.63  | 31 | 1 |
| 0  | 145 | 72.4 | 29.34 | 153.74 | 44.2 | 0.63  | 31 | 1 |
| 0  | 145 | 72.4 | 29.34 | 153.74 | 44.2 | 0.63  | 31 | 1 |

|    |     |     |       |        |      |       |    |   |
|----|-----|-----|-------|--------|------|-------|----|---|
| 0  | 114 | 80  | 34    | 285    | 44.2 | 0.167 | 27 | 0 |
| 0  | 114 | 80  | 34    | 285    | 44.2 | 0.167 | 27 | 0 |
| 0  | 114 | 80  | 34    | 285    | 44.2 | 0.167 | 27 | 0 |
| 4  | 118 | 70  | 29.34 | 153.74 | 44.5 | 0.904 | 26 | 0 |
| 4  | 118 | 70  | 29.34 | 153.74 | 44.5 | 0.904 | 26 | 0 |
| 4  | 118 | 70  | 29.34 | 153.74 | 44.5 | 0.904 | 26 | 0 |
| 2  | 174 | 88  | 37    | 120    | 44.5 | 0.646 | 24 | 1 |
| 2  | 174 | 88  | 37    | 120    | 44.5 | 0.646 | 24 | 1 |
| 2  | 174 | 88  | 37    | 120    | 44.5 | 0.646 | 24 | 1 |
| 0  | 95  | 64  | 39    | 105    | 44.6 | 0.366 | 22 | 0 |
| 0  | 95  | 64  | 39    | 105    | 44.6 | 0.366 | 22 | 0 |
| 0  | 95  | 64  | 39    | 105    | 44.6 | 0.366 | 22 | 0 |
| 5  | 143 | 78  | 29.34 | 153.74 | 45   | 0.19  | 47 | 0 |
| 5  | 143 | 78  | 29.34 | 153.74 | 45   | 0.19  | 47 | 0 |
| 0  | 117 | 80  | 31    | 53     | 45.2 | 0.089 | 24 | 0 |
| 0  | 117 | 80  | 31    | 53     | 45.2 | 0.089 | 24 | 0 |
| 0  | 67  | 76  | 29.34 | 153.74 | 45.3 | 0.194 | 46 | 0 |
| 0  | 67  | 76  | 29.34 | 153.74 | 45.3 | 0.194 | 46 | 0 |
| 0  | 107 | 76  | 29.34 | 153.74 | 45.3 | 0.686 | 24 | 0 |
| 0  | 107 | 76  | 29.34 | 153.74 | 45.3 | 0.686 | 24 | 0 |
| 1  | 119 | 88  | 41    | 170    | 45.3 | 0.507 | 26 | 0 |
| 1  | 119 | 88  | 41    | 170    | 45.3 | 0.507 | 26 | 0 |
| 1  | 119 | 88  | 41    | 170    | 45.3 | 0.507 | 26 | 0 |
| 1  | 119 | 88  | 41    | 170    | 45.3 | 0.507 | 26 | 0 |
| 9  | 171 | 110 | 24    | 240    | 45.4 | 0.721 | 54 | 1 |
| 9  | 171 | 110 | 24    | 240    | 45.4 | 0.721 | 54 | 1 |
| 2  | 102 | 86  | 36    | 120    | 45.5 | 0.127 | 23 | 1 |
| 2  | 102 | 86  | 36    | 120    | 45.5 | 0.127 | 23 | 1 |
| 2  | 102 | 86  | 36    | 120    | 45.5 | 0.127 | 23 | 1 |
| 10 | 101 | 86  | 37    | 153.74 | 45.6 | 1.136 | 38 | 1 |
| 10 | 101 | 86  | 37    | 153.74 | 45.6 | 1.136 | 38 | 1 |
| 1  | 119 | 86  | 39    | 220    | 45.6 | 0.808 | 29 | 1 |
| 1  | 119 | 86  | 39    | 220    | 45.6 | 0.808 | 29 | 1 |
| 5  | 166 | 76  | 29.34 | 153.74 | 45.7 | 0.34  | 27 | 1 |
| 5  | 166 | 76  | 29.34 | 153.74 | 45.7 | 0.34  | 27 | 1 |
| 5  | 166 | 76  | 29.34 | 153.74 | 45.7 | 0.34  | 27 | 1 |
| 6  | 154 | 78  | 41    | 140    | 46.1 | 0.571 | 27 | 0 |
| 6  | 154 | 78  | 41    | 140    | 46.1 | 0.571 | 27 | 0 |
| 6  | 154 | 78  | 41    | 140    | 46.1 | 0.571 | 27 | 0 |
| 1  | 144 | 82  | 46    | 180    | 46.1 | 0.335 | 46 | 1 |
| 1  | 144 | 82  | 46    | 180    | 46.1 | 0.335 | 46 | 1 |
| 1  | 144 | 82  | 46    | 180    | 46.1 | 0.335 | 46 | 1 |
| 11 | 103 | 68  | 40    | 153.74 | 46.2 | 0.126 | 42 | 0 |
| 11 | 103 | 68  | 40    | 153.74 | 46.2 | 0.126 | 42 | 0 |
| 6  | 134 | 80  | 37    | 370    | 46.2 | 0.238 | 46 | 1 |
| 6  | 134 | 80  | 37    | 370    | 46.2 | 0.238 | 46 | 1 |
| 1  | 81  | 74  | 41    | 57     | 46.3 | 1.096 | 32 | 0 |
| 1  | 81  | 74  | 41    | 57     | 46.3 | 1.096 | 32 | 0 |
| 1  | 81  | 74  | 41    | 57     | 46.3 | 1.096 | 32 | 0 |
| 0  | 173 | 78  | 32    | 265    | 46.5 | 1.159 | 58 | 0 |
| 0  | 173 | 78  | 32    | 265    | 46.5 | 1.159 | 58 | 0 |

|    |     |      |       |        |      |       |    |   |
|----|-----|------|-------|--------|------|-------|----|---|
| 0  | 173 | 78   | 32    | 265    | 46.5 | 1.159 | 58 | 0 |
| 0  | 173 | 78   | 32    | 265    | 46.5 | 1.159 | 58 | 0 |
| 0  | 173 | 78   | 32    | 265    | 46.5 | 1.159 | 58 | 0 |
| 7  | 81  | 78   | 40    | 48     | 46.7 | 0.261 | 42 | 0 |
| 7  | 81  | 78   | 40    | 48     | 46.7 | 0.261 | 42 | 0 |
| 11 | 111 | 84   | 40    | 153.74 | 46.8 | 0.925 | 45 | 1 |
| 11 | 111 | 84   | 40    | 153.74 | 46.8 | 0.925 | 45 | 1 |
| 0  | 100 | 88   | 60    | 110    | 46.8 | 0.962 | 31 | 0 |
| 0  | 100 | 88   | 60    | 110    | 46.8 | 0.962 | 31 | 0 |
| 8  | 188 | 78   | 29.34 | 153.74 | 47.9 | 0.137 | 43 | 1 |
| 8  | 188 | 78   | 29.34 | 153.74 | 47.9 | 0.137 | 43 | 1 |
| 8  | 188 | 78   | 29.34 | 153.74 | 47.9 | 0.137 | 43 | 1 |
| 0  | 165 | 76   | 43    | 255    | 47.9 | 0.259 | 26 | 0 |
| 0  | 165 | 76   | 43    | 255    | 47.9 | 0.259 | 26 | 0 |
| 4  | 156 | 75   | 29.34 | 153.74 | 48.3 | 0.238 | 32 | 1 |
| 4  | 156 | 75   | 29.34 | 153.74 | 48.3 | 0.238 | 32 | 1 |
| 4  | 156 | 75   | 29.34 | 153.74 | 48.3 | 0.238 | 32 | 1 |
| 3  | 162 | 72.4 | 110   | 215    | 48.7 | 0.52  | 24 | 0 |
| 3  | 162 | 72.4 | 110   | 215    | 48.7 | 0.52  | 24 | 0 |
| 5  | 137 | 108  | 29.34 | 153.74 | 48.8 | 0.227 | 37 | 1 |
| 5  | 137 | 108  | 29.34 | 153.74 | 48.8 | 0.227 | 37 | 1 |
| 1  | 147 | 94   | 41    | 153.74 | 49.3 | 0.358 | 27 | 1 |
| 1  | 147 | 94   | 41    | 153.74 | 49.3 | 0.358 | 27 | 1 |
| 1  | 147 | 94   | 41    | 153.74 | 49.3 | 0.358 | 27 | 1 |
| 0  | 162 | 76   | 36    | 153.74 | 49.6 | 0.364 | 26 | 1 |
| 0  | 162 | 76   | 36    | 153.74 | 49.6 | 0.364 | 26 | 1 |
| 0  | 162 | 76   | 36    | 153.74 | 49.6 | 0.364 | 26 | 1 |
| 1  | 122 | 90   | 51    | 220    | 49.7 | 0.325 | 31 | 1 |
| 1  | 122 | 90   | 51    | 220    | 49.7 | 0.325 | 31 | 1 |
| 1  | 122 | 90   | 51    | 220    | 49.7 | 0.325 | 31 | 1 |
| 7  | 152 | 88   | 44    | 153.74 | 50   | 0.337 | 36 | 1 |
| 7  | 152 | 88   | 44    | 153.74 | 50   | 0.337 | 36 | 1 |
| 7  | 152 | 88   | 44    | 153.74 | 50   | 0.337 | 36 | 1 |
| 6  | 139 | 84   | 37    | 153.74 | 50.7 | 0.32  | 50 | 1 |
| 6  | 139 | 84   | 37    | 153.74 | 50.7 | 0.32  | 50 | 1 |
| 11 | 135 | 72.4 | 29.34 | 153.74 | 52.3 | 0.578 | 40 | 1 |
| 11 | 135 | 72.4 | 29.34 | 153.74 | 52.3 | 0.578 | 40 | 1 |
| 0  | 165 | 90   | 33    | 680    | 52.3 | 0.427 | 23 | 0 |
| 0  | 165 | 90   | 33    | 680    | 52.3 | 0.427 | 23 | 0 |
| 2  | 167 | 44   | 30    | 140    | 52.7 | 0.452 | 28 | 0 |
| 2  | 167 | 44   | 30    | 140    | 52.7 | 0.452 | 28 | 0 |
| 5  | 115 | 98   | 29.34 | 153.74 | 52.9 | 0.209 | 28 | 1 |
| 5  | 115 | 98   | 29.34 | 153.74 | 52.9 | 0.209 | 28 | 1 |
| 5  | 115 | 98   | 29.34 | 153.74 | 52.9 | 0.209 | 28 | 1 |
| 0  | 162 | 76   | 56    | 100    | 53.2 | 0.759 | 25 | 1 |
| 0  | 162 | 76   | 56    | 100    | 53.2 | 0.759 | 25 | 1 |
| 0  | 162 | 76   | 56    | 100    | 53.2 | 0.759 | 25 | 1 |
| 1  | 88  | 30   | 42    | 99     | 55   | 0.496 | 26 | 1 |
| 1  | 88  | 30   | 42    | 99     | 55   | 0.496 | 26 | 1 |
| 1  | 88  | 30   | 42    | 99     | 55   | 0.496 | 26 | 1 |
| 3  | 123 | 100  | 35    | 240    | 57.3 | 0.88  | 22 | 0 |

|   |     |     |       |        |      |       |    |   |
|---|-----|-----|-------|--------|------|-------|----|---|
| 3 | 123 | 100 | 35    | 240    | 57.3 | 0.88  | 22 | 0 |
| 3 | 123 | 100 | 35    | 240    | 57.3 | 0.88  | 22 | 0 |
| 0 | 180 | 78  | 63    | 14     | 59.4 | 2.42  | 25 | 1 |
| 0 | 180 | 78  | 63    | 14     | 59.4 | 2.42  | 25 | 1 |
| 0 | 180 | 78  | 63    | 14     | 59.4 | 2.42  | 25 | 1 |
| 1 | 100 | 62  | 29.34 | 153.74 | 64.4 | 0.152 | 36 | 0 |
| 1 | 100 | 62  | 29.34 | 153.74 | 64.4 | 0.152 | 36 | 0 |
| 0 | 129 | 110 | 46    | 130    | 67.1 | 0.319 | 26 | 1 |
| 0 | 129 | 110 | 46    | 130    | 67.1 | 0.319 | 26 | 1 |
| 0 | 129 | 110 | 46    | 130    | 67.1 | 0.319 | 26 | 1 |
| 4 | 183 | 66  | 29.34 | 215    | 80.6 | 0.654 | 40 | 0 |
| 4 | 183 | 66  | 29.34 | 215    | 80.6 | 0.654 | 40 | 0 |
