# Supplementary material for: Improved Functional Causal Likelihood-Based Causal Discovery Method for Diabetes Risk Factors
Source: Hindawi journal article supplement (doi:10.1155/2021/5552085), 2021-05-14
Supplement: f1 [file 5552085.f1.zip]

| Pregnanci | Glucose | BloodPres | SkinThick | Insulin | BMI   | DiabetesF | Age | Outcome |
|-----------|---------|-----------|-----------|---------|-------|-----------|-----|---------|
| 0         | 102     | 52        | 29.15     | 155.55  | 25.1  | 0.078     | 21  | 0       |
| 2         | 108     | 62        | 32        | 56      | 25.2  | 0.128     | 21  | 0       |
| 3         | 111     | 62        | 29.15     | 155.55  | 22.6  | 0.142     | 21  | 0       |
| 0         | 137     | 68        | 14        | 148     | 24.8  | 0.143     | 21  | 0       |
| 1         | 97      | 70        | 15        | 155.55  | 18.2  | 0.147     | 21  | 0       |
| 4         | 94      | 65        | 22        | 155.55  | 24.7  | 0.148     | 21  | 0       |
| 2         | 112     | 75        | 32        | 155.55  | 35.7  | 0.148     | 21  | 0       |
| 2         | 108     | 64        | 29.15     | 155.55  | 30.8  | 0.158     | 21  | 0       |
| 1         | 89      | 66        | 23        | 94      | 28.1  | 0.167     | 21  | 0       |
| 1         | 105     | 58        | 29.15     | 155.55  | 24.3  | 0.187     | 21  | 0       |
| 1         | 91      | 64        | 24        | 155.55  | 29.2  | 0.192     | 21  | 0       |
| 1         | 116     | 70        | 28        | 155.55  | 27.4  | 0.204     | 21  | 0       |
| 0         | 125     | 68        | 29.15     | 155.55  | 24.7  | 0.206     | 21  | 0       |
| 0         | 139     | 62        | 17        | 210     | 22.1  | 0.207     | 21  | 0       |
| 4         | 99      | 76        | 15        | 51      | 23.2  | 0.223     | 21  | 0       |
| 1         | 73      | 50        | 10        | 155.55  | 23    | 0.248     | 21  | 0       |
| 0         | 101     | 64        | 17        | 155.55  | 21    | 0.252     | 21  | 0       |
| 1         | 143     | 74        | 22        | 61      | 26.2  | 0.256     | 21  | 0       |
| 1         | 80      | 55        | 29.15     | 155.55  | 19.1  | 0.258     | 21  | 0       |
| 0         | 125     | 96        | 29.15     | 155.55  | 22.5  | 0.262     | 21  | 0       |
| 2         | 130     | 96        | 29.15     | 155.55  | 22.6  | 0.268     | 21  | 0       |
| 1         | 96      | 64        | 27        | 87      | 33.2  | 0.289     | 21  | 0       |
| 1         | 114     | 66        | 36        | 200     | 38.1  | 0.289     | 21  | 0       |
| 1         | 97      | 64        | 19        | 82      | 18.2  | 0.299     | 21  | 0       |
| 1         | 121.69  | 74        | 20        | 23      | 27.7  | 0.299     | 21  | 0       |
| 2         | 84      | 72.41     | 29.15     | 155.55  | 32.46 | 0.304     | 21  | 0       |
| 2         | 117     | 90        | 19        | 71      | 25.2  | 0.313     | 21  | 0       |
| 0         | 94      | 70        | 27        | 115     | 43.5  | 0.347     | 21  | 0       |
| 0         | 134     | 58        | 20        | 291     | 26.4  | 0.352     | 21  | 0       |
| 2         | 100     | 64        | 23        | 155.55  | 29.7  | 0.368     | 21  | 0       |
| 0         | 151     | 90        | 46        | 155.55  | 42.1  | 0.371     | 21  | 1       |
| 1         | 131     | 64        | 14        | 415     | 23.7  | 0.389     | 21  | 0       |
| 0         | 132     | 78        | 29.15     | 155.55  | 32.4  | 0.393     | 21  | 0       |
| 1         | 99      | 72        | 30        | 18      | 38.6  | 0.412     | 21  | 0       |
| 2         | 115     | 64        | 22        | 155.55  | 30.8  | 0.421     | 21  | 0       |
| 1         | 71      | 78        | 50        | 45      | 33.2  | 0.422     | 21  | 0       |
| 0         | 78      | 88        | 29        | 40      | 36.9  | 0.434     | 21  | 0       |
| 3         | 87      | 60        | 18        | 155.55  | 21.8  | 0.444     | 21  | 0       |
| 0         | 124     | 56        | 13        | 105     | 21.8  | 0.452     | 21  | 0       |
| 2         | 99      | 60        | 17        | 160     | 36.6  | 0.453     | 21  | 0       |
| 0         | 102     | 64        | 46        | 78      | 40.6  | 0.496     | 21  | 0       |
| 1         | 124     | 60        | 32        | 155.55  | 35.8  | 0.514     | 21  | 0       |
| 0         | 126     | 86        | 27        | 120     | 27.4  | 0.515     | 21  | 0       |
| 0         | 138     | 60        | 35        | 167     | 34.6  | 0.534     | 21  | 1       |
| 1         | 139     | 62        | 41        | 480     | 40.7  | 0.536     | 21  | 0       |
| 1         | 113     | 64        | 35        | 155.55  | 33.6  | 0.543     | 21  | 1       |
| 0         | 84      | 64        | 22        | 66      | 35.8  | 0.545     | 21  | 0       |
| 1         | 99      | 58        | 10        | 155.55  | 25.4  | 0.551     | 21  | 0       |
| 1         | 89      | 24        | 19        | 25      | 27.8  | 0.559     | 21  | 0       |
| 3         | 90      | 78        | 29.15     | 155.55  | 42.7  | 0.559     | 21  | 0       |

|   |        |       |       |        |       |       |    |   |
|---|--------|-------|-------|--------|-------|-------|----|---|
| 2 | 94     | 68    | 18    | 76     | 26    | 0.561 | 21 | 0 |
| 0 | 102    | 75    | 23    | 155.55 | 32.46 | 0.572 | 21 | 0 |
| 0 | 100    | 70    | 26    | 50     | 30.8  | 0.597 | 21 | 0 |
| 2 | 99     | 52    | 15    | 94     | 24.6  | 0.637 | 21 | 0 |
| 1 | 130    | 60    | 23    | 170    | 28.6  | 0.692 | 21 | 0 |
| 2 | 118    | 80    | 29.15 | 155.55 | 42.9  | 0.693 | 21 | 1 |
| 2 | 142    | 82    | 18    | 64     | 24.7  | 0.761 | 21 | 0 |
| 1 | 126    | 56    | 29    | 152    | 28.7  | 0.801 | 21 | 0 |
| 0 | 113    | 80    | 16    | 155.55 | 31    | 0.874 | 21 | 0 |
| 1 | 109    | 60    | 8     | 182    | 25.4  | 0.947 | 21 | 0 |
| 2 | 84     | 50    | 23    | 76     | 30.4  | 0.968 | 21 | 0 |
| 0 | 177    | 60    | 29    | 478    | 34.6  | 1.072 | 21 | 1 |
| 0 | 118    | 64    | 23    | 89     | 32.46 | 1.731 | 21 | 0 |
| 2 | 90     | 70    | 17    | 155.55 | 27.3  | 0.085 | 22 | 0 |
| 1 | 87     | 78    | 27    | 32     | 34.6  | 0.101 | 22 | 0 |
| 2 | 74     | 72.41 | 29.15 | 155.55 | 32.46 | 0.102 | 22 | 0 |
| 1 | 128    | 82    | 17    | 183    | 27.5  | 0.115 | 22 | 0 |
| 3 | 113    | 44    | 13    | 155.55 | 22.4  | 0.14  | 22 | 0 |
| 1 | 121.69 | 48    | 20    | 155.55 | 24.7  | 0.14  | 22 | 0 |
| 2 | 92     | 52    | 29.15 | 155.55 | 30.1  | 0.141 | 22 | 0 |
| 1 | 106    | 70    | 28    | 135    | 34.2  | 0.142 | 22 | 0 |
| 2 | 101    | 58    | 35    | 90     | 21.8  | 0.155 | 22 | 0 |
| 0 | 137    | 70    | 38    | 155.55 | 33.2  | 0.17  | 22 | 0 |
| 0 | 105    | 64    | 41    | 142    | 41.5  | 0.173 | 22 | 0 |
| 3 | 80     | 72.41 | 29.15 | 155.55 | 32.46 | 0.174 | 22 | 0 |
| 2 | 127    | 46    | 21    | 335    | 34.4  | 0.176 | 22 | 0 |
| 1 | 151    | 60    | 29.15 | 155.55 | 26.1  | 0.179 | 22 | 0 |
| 0 | 131    | 66    | 40    | 155.55 | 34.3  | 0.196 | 22 | 1 |
| 2 | 98     | 60    | 17    | 120    | 34.7  | 0.198 | 22 | 0 |
| 1 | 109    | 58    | 18    | 116    | 28.5  | 0.219 | 22 | 0 |
| 2 | 88     | 74    | 19    | 53     | 29    | 0.229 | 22 | 0 |
| 0 | 105    | 68    | 22    | 155.55 | 20    | 0.236 | 22 | 0 |
| 0 | 101    | 65    | 28    | 155.55 | 24.6  | 0.237 | 22 | 0 |
| 0 | 99     | 72.41 | 29.15 | 155.55 | 25    | 0.253 | 22 | 0 |
| 3 | 148    | 66    | 25    | 155.55 | 32.5  | 0.256 | 22 | 0 |
| 3 | 173    | 84    | 33    | 474    | 35.7  | 0.258 | 22 | 1 |
| 8 | 120    | 86    | 29.15 | 155.55 | 28.4  | 0.259 | 22 | 1 |
| 0 | 119    | 66    | 27    | 155.55 | 38.8  | 0.259 | 22 | 0 |
| 1 | 95     | 60    | 18    | 58     | 23.9  | 0.26  | 22 | 0 |
| 3 | 88     | 58    | 11    | 54     | 24.8  | 0.267 | 22 | 0 |
| 0 | 74     | 52    | 10    | 36     | 27.8  | 0.269 | 22 | 0 |
| 0 | 98     | 82    | 15    | 84     | 25.2  | 0.299 | 22 | 0 |
| 3 | 81     | 86    | 16    | 66     | 27.5  | 0.306 | 22 | 0 |
| 3 | 130    | 64    | 29.15 | 155.55 | 23.1  | 0.314 | 22 | 0 |
| 2 | 108    | 52    | 26    | 63     | 32.5  | 0.318 | 22 | 0 |
| 1 | 71     | 48    | 18    | 76     | 20.4  | 0.323 | 22 | 0 |
| 2 | 175    | 88    | 29.15 | 155.55 | 22.9  | 0.326 | 22 | 0 |
| 2 | 56     | 56    | 28    | 45     | 24.2  | 0.332 | 22 | 0 |
| 0 | 95     | 64    | 39    | 105    | 44.6  | 0.366 | 22 | 0 |
| 1 | 121.69 | 68    | 35    | 155.55 | 32    | 0.389 | 22 | 0 |
| 1 | 79     | 75    | 30    | 155.55 | 32    | 0.396 | 22 | 0 |

|   |     |       |       |        |      |       |    |   |
|---|-----|-------|-------|--------|------|-------|----|---|
| 3 | 139 | 54    | 29.15 | 155.55 | 25.6 | 0.402 | 22 | 1 |
| 1 | 93  | 56    | 11    | 155.55 | 22.5 | 0.417 | 22 | 0 |
| 2 | 106 | 56    | 27    | 165    | 29   | 0.426 | 22 | 0 |
| 3 | 111 | 58    | 31    | 44     | 29.5 | 0.43  | 22 | 0 |
| 0 | 141 | 84    | 26    | 155.55 | 32.4 | 0.433 | 22 | 0 |
| 4 | 97  | 60    | 23    | 155.55 | 28.2 | 0.443 | 22 | 0 |
| 4 | 91  | 70    | 32    | 88     | 33.1 | 0.446 | 22 | 0 |
| 0 | 179 | 50    | 36    | 159    | 37.8 | 0.455 | 22 | 1 |
| 1 | 130 | 70    | 13    | 105    | 25.9 | 0.472 | 22 | 0 |
| 1 | 97  | 66    | 15    | 140    | 23.2 | 0.487 | 22 | 0 |
| 1 | 103 | 80    | 11    | 82     | 19.4 | 0.491 | 22 | 0 |
| 0 | 117 | 66    | 31    | 188    | 30.8 | 0.493 | 22 | 0 |
| 2 | 83  | 66    | 23    | 50     | 32.2 | 0.497 | 22 | 0 |
| 1 | 87  | 60    | 37    | 75     | 37.2 | 0.509 | 22 | 0 |
| 0 | 104 | 64    | 37    | 64     | 33.6 | 0.51  | 22 | 1 |
| 2 | 91  | 62    | 29.15 | 155.55 | 27.3 | 0.525 | 22 | 0 |
| 1 | 80  | 74    | 11    | 60     | 30   | 0.527 | 22 | 0 |
| 0 | 93  | 60    | 25    | 92     | 28.7 | 0.532 | 22 | 0 |
| 1 | 79  | 80    | 25    | 37     | 25.4 | 0.583 | 22 | 0 |
| 2 | 71  | 70    | 27    | 155.55 | 28   | 0.586 | 22 | 0 |
| 0 | 106 | 70    | 37    | 148    | 39.4 | 0.605 | 22 | 0 |
| 4 | 142 | 86    | 29.15 | 155.55 | 44   | 0.645 | 22 | 1 |
| 1 | 139 | 46    | 19    | 83     | 28.7 | 0.654 | 22 | 0 |
| 0 | 188 | 82    | 14    | 185    | 32   | 0.682 | 22 | 1 |
| 2 | 122 | 60    | 18    | 106    | 29.8 | 0.717 | 22 | 0 |
| 2 | 95  | 54    | 14    | 88     | 26.1 | 0.748 | 22 | 0 |
| 2 | 88  | 58    | 26    | 16     | 28.4 | 0.766 | 22 | 0 |
| 3 | 123 | 100   | 35    | 240    | 57.3 | 0.88  | 22 | 0 |
| 2 | 108 | 62    | 10    | 278    | 25.3 | 0.881 | 22 | 0 |
| 1 | 143 | 84    | 23    | 310    | 42.4 | 1.076 | 22 | 0 |
| 1 | 97  | 68    | 21    | 155.55 | 27.2 | 1.095 | 22 | 0 |
| 4 | 136 | 70    | 29.15 | 155.55 | 31.2 | 1.182 | 22 | 1 |
| 1 | 181 | 78    | 42    | 293    | 40   | 1.258 | 22 | 1 |
| 1 | 199 | 76    | 43    | 155.55 | 42.9 | 1.394 | 22 | 1 |
| 2 | 99  | 72.41 | 29.15 | 155.55 | 22.2 | 0.108 | 23 | 0 |
| 2 | 102 | 86    | 36    | 120    | 45.5 | 0.127 | 23 | 1 |
| 0 | 107 | 60    | 25    | 155.55 | 26.4 | 0.133 | 23 | 0 |
| 1 | 111 | 62    | 13    | 182    | 24   | 0.138 | 23 | 0 |
| 1 | 111 | 86    | 19    | 155.55 | 30.1 | 0.143 | 23 | 0 |
| 3 | 116 | 72.41 | 29.15 | 155.55 | 23.5 | 0.187 | 23 | 0 |
| 1 | 89  | 76    | 34    | 37     | 31.2 | 0.192 | 23 | 0 |
| 4 | 129 | 86    | 20    | 270    | 35.1 | 0.231 | 23 | 0 |
| 0 | 84  | 82    | 31    | 125    | 38.2 | 0.233 | 23 | 0 |
| 1 | 91  | 54    | 25    | 100    | 25.2 | 0.234 | 23 | 0 |
| 4 | 154 | 62    | 31    | 284    | 32.8 | 0.237 | 23 | 0 |
| 2 | 68  | 62    | 13    | 15     | 20.1 | 0.257 | 23 | 0 |
| 1 | 118 | 58    | 36    | 94     | 33.3 | 0.261 | 23 | 0 |
| 0 | 113 | 76    | 29.15 | 155.55 | 33.3 | 0.278 | 23 | 1 |
| 3 | 74  | 68    | 28    | 45     | 29.7 | 0.293 | 23 | 0 |
| 4 | 132 | 72.41 | 29.15 | 155.55 | 32.9 | 0.302 | 23 | 1 |
| 1 | 93  | 70    | 31    | 155.55 | 30.4 | 0.315 | 23 | 0 |

|   |     |       |       |        |       |       |    |   |
|---|-----|-------|-------|--------|-------|-------|----|---|
| 2 | 111 | 60    | 29.15 | 155.55 | 26.2  | 0.343 | 23 | 0 |
| 6 | 93  | 50    | 30    | 64     | 28.7  | 0.356 | 23 | 0 |
| 2 | 107 | 74    | 30    | 100    | 33.6  | 0.404 | 23 | 0 |
| 1 | 82  | 64    | 13    | 95     | 21.2  | 0.415 | 23 | 0 |
| 1 | 88  | 62    | 24    | 44     | 29.9  | 0.422 | 23 | 0 |
| 0 | 165 | 90    | 33    | 680    | 52.3  | 0.427 | 23 | 0 |
| 0 | 104 | 64    | 23    | 116    | 27.8  | 0.454 | 23 | 0 |
| 2 | 134 | 70    | 29.15 | 155.55 | 28.9  | 0.542 | 23 | 1 |
| 2 | 101 | 58    | 17    | 265    | 24.2  | 0.614 | 23 | 0 |
| 2 | 94  | 76    | 18    | 66     | 31.6  | 0.649 | 23 | 0 |
| 2 | 93  | 64    | 32    | 160    | 38    | 0.674 | 23 | 1 |
| 3 | 107 | 62    | 13    | 48     | 22.9  | 0.678 | 23 | 1 |
| 1 | 79  | 60    | 42    | 48     | 43.5  | 0.678 | 23 | 0 |
| 0 | 179 | 90    | 27    | 155.55 | 44.1  | 0.686 | 23 | 1 |
| 1 | 153 | 82    | 42    | 485    | 40.6  | 0.687 | 23 | 0 |
| 0 | 119 | 64    | 18    | 92     | 34.9  | 0.725 | 23 | 0 |
| 0 | 127 | 80    | 37    | 210    | 36.3  | 0.804 | 23 | 0 |
| 1 | 140 | 74    | 26    | 180    | 24.1  | 0.828 | 23 | 0 |
| 1 | 109 | 56    | 21    | 135    | 25.2  | 0.833 | 23 | 0 |
| 2 | 121 | 70    | 32    | 95     | 39.1  | 0.886 | 23 | 0 |
| 1 | 143 | 86    | 30    | 330    | 30.1  | 0.892 | 23 | 0 |
| 0 | 117 | 80    | 31    | 53     | 45.2  | 0.089 | 24 | 0 |
| 3 | 116 | 74    | 15    | 105    | 26.3  | 0.107 | 24 | 0 |
| 1 | 157 | 72    | 21    | 168    | 25.6  | 0.123 | 24 | 0 |
| 4 | 114 | 64    | 29.15 | 155.55 | 28.9  | 0.126 | 24 | 0 |
| 2 | 92  | 62    | 28    | 155.55 | 31.6  | 0.13  | 24 | 0 |
| 0 | 119 | 72.41 | 29.15 | 155.55 | 32.4  | 0.141 | 24 | 1 |
| 3 | 125 | 58    | 29.15 | 155.55 | 31.6  | 0.151 | 24 | 0 |
| 3 | 99  | 54    | 19    | 86     | 25.6  | 0.154 | 24 | 0 |
| 1 | 107 | 68    | 19    | 155.55 | 26.5  | 0.165 | 24 | 0 |
| 2 | 112 | 78    | 50    | 140    | 39.4  | 0.175 | 24 | 0 |
| 3 | 171 | 72    | 33    | 135    | 33.3  | 0.199 | 24 | 1 |
| 1 | 119 | 54    | 13    | 50     | 22.3  | 0.205 | 24 | 0 |
| 1 | 112 | 80    | 45    | 132    | 34.8  | 0.217 | 24 | 0 |
| 4 | 117 | 64    | 27    | 120    | 33.2  | 0.23  | 24 | 0 |
| 0 | 102 | 78    | 40    | 90     | 34.5  | 0.238 | 24 | 0 |
| 0 | 95  | 85    | 25    | 36     | 37.4  | 0.247 | 24 | 1 |
| 2 | 90  | 80    | 14    | 55     | 24.4  | 0.249 | 24 | 0 |
| 6 | 111 | 64    | 39    | 155.55 | 34.2  | 0.26  | 24 | 0 |
| 1 | 81  | 72    | 18    | 40     | 26.6  | 0.283 | 24 | 0 |
| 3 | 106 | 54    | 21    | 158    | 30.9  | 0.292 | 24 | 0 |
| 3 | 158 | 64    | 13    | 387    | 31.2  | 0.295 | 24 | 0 |
| 4 | 128 | 70    | 29.15 | 155.55 | 34.3  | 0.303 | 24 | 0 |
| 7 | 105 | 72.41 | 29.15 | 155.55 | 32.46 | 0.305 | 24 | 0 |
| 2 | 112 | 66    | 22    | 155.55 | 25    | 0.307 | 24 | 0 |
| 5 | 86  | 68    | 28    | 71     | 30.2  | 0.364 | 24 | 0 |
| 0 | 135 | 68    | 42    | 250    | 42.3  | 0.365 | 24 | 1 |
| 0 | 147 | 85    | 54    | 155.55 | 42.8  | 0.375 | 24 | 0 |
| 1 | 136 | 74    | 50    | 204    | 37.4  | 0.399 | 24 | 0 |
| 1 | 108 | 88    | 19    | 155.55 | 27.1  | 0.4   | 24 | 0 |
| 1 | 87  | 68    | 34    | 77     | 37.6  | 0.401 | 24 | 0 |

|   |     |       |       |        |       |       |    |   |
|---|-----|-------|-------|--------|-------|-------|----|---|
| 1 | 108 | 60    | 46    | 178    | 35.5  | 0.415 | 24 | 0 |
| 0 | 140 | 65    | 26    | 130    | 42.6  | 0.431 | 24 | 1 |
| 2 | 100 | 54    | 28    | 105    | 37.8  | 0.498 | 24 | 0 |
| 0 | 126 | 84    | 29    | 215    | 30.7  | 0.52  | 24 | 0 |
| 1 | 90  | 62    | 12    | 43     | 27.2  | 0.58  | 24 | 0 |
| 4 | 95  | 70    | 32    | 155.55 | 32.1  | 0.612 | 24 | 0 |
| 1 | 128 | 48    | 45    | 194    | 40.5  | 0.613 | 24 | 1 |
| 2 | 83  | 65    | 28    | 66     | 36.8  | 0.629 | 24 | 0 |
| 2 | 174 | 88    | 37    | 120    | 44.5  | 0.646 | 24 | 1 |
| 3 | 162 | 52    | 38    | 155.55 | 37.2  | 0.652 | 24 | 1 |
| 1 | 193 | 50    | 16    | 375    | 25.9  | 0.655 | 24 | 0 |
| 0 | 107 | 76    | 29.15 | 155.55 | 45.3  | 0.686 | 24 | 0 |
| 2 | 141 | 58    | 34    | 128    | 25.4  | 0.699 | 24 | 0 |
| 1 | 107 | 72    | 30    | 82     | 30.8  | 0.821 | 24 | 0 |
| 2 | 128 | 64    | 42    | 155.55 | 40    | 1.101 | 24 | 0 |
| 1 | 77  | 56    | 30    | 56     | 33.3  | 1.251 | 24 | 0 |
| 2 | 114 | 68    | 22    | 155.55 | 28.7  | 0.092 | 25 | 0 |
| 3 | 121 | 52    | 29.15 | 155.55 | 36    | 0.127 | 25 | 1 |
| 4 | 84  | 90    | 23    | 56     | 39.5  | 0.159 | 25 | 0 |
| 2 | 87  | 58    | 16    | 52     | 32.7  | 0.166 | 25 | 0 |
| 2 | 68  | 70    | 32    | 66     | 25    | 0.187 | 25 | 0 |
| 2 | 90  | 60    | 29.15 | 155.55 | 23.5  | 0.191 | 25 | 0 |
| 3 | 112 | 74    | 30    | 155.55 | 31.6  | 0.197 | 25 | 1 |
| 1 | 125 | 70    | 24    | 110    | 24.3  | 0.221 | 25 | 0 |
| 3 | 108 | 62    | 24    | 155.55 | 26    | 0.223 | 25 | 0 |
| 2 | 105 | 58    | 40    | 94     | 34.9  | 0.225 | 25 | 0 |
| 0 | 86  | 68    | 32    | 155.55 | 35.8  | 0.238 | 25 | 0 |
| 2 | 155 | 52    | 27    | 540    | 38.7  | 0.24  | 25 | 1 |
| 3 | 193 | 70    | 31    | 155.55 | 34.9  | 0.241 | 25 | 1 |
| 0 | 94  | 72.41 | 29.15 | 155.55 | 32.46 | 0.256 | 25 | 0 |
| 0 | 93  | 60    | 29.15 | 155.55 | 35.3  | 0.263 | 25 | 0 |
| 1 | 119 | 44    | 47    | 63     | 35.5  | 0.28  | 25 | 0 |
| 2 | 81  | 60    | 22    | 155.55 | 27.7  | 0.29  | 25 | 0 |
| 1 | 95  | 66    | 13    | 38     | 19.6  | 0.334 | 25 | 0 |
| 0 | 101 | 62    | 29.15 | 155.55 | 21.9  | 0.336 | 25 | 0 |
| 3 | 83  | 58    | 31    | 18     | 34.3  | 0.336 | 25 | 0 |
| 0 | 73  | 72.41 | 29.15 | 155.55 | 21.1  | 0.342 | 25 | 0 |
| 5 | 139 | 80    | 35    | 160    | 31.6  | 0.361 | 25 | 1 |
| 0 | 91  | 68    | 32    | 210    | 39.9  | 0.381 | 25 | 0 |
| 3 | 82  | 70    | 29.15 | 155.55 | 21.1  | 0.389 | 25 | 0 |
| 4 | 76  | 62    | 29.15 | 155.55 | 34    | 0.391 | 25 | 0 |
| 2 | 144 | 58    | 33    | 135    | 31.6  | 0.422 | 25 | 1 |
| 1 | 92  | 62    | 25    | 41     | 19.5  | 0.482 | 25 | 0 |
| 1 | 116 | 78    | 29    | 180    | 36.1  | 0.496 | 25 | 0 |
| 5 | 109 | 62    | 41    | 129    | 35.8  | 0.514 | 25 | 1 |
| 1 | 112 | 72    | 30    | 176    | 34.4  | 0.528 | 25 | 0 |
| 2 | 81  | 72    | 15    | 76     | 30.1  | 0.547 | 25 | 0 |
| 3 | 84  | 68    | 30    | 106    | 31.9  | 0.591 | 25 | 0 |
| 2 | 129 | 74    | 26    | 205    | 33.2  | 0.591 | 25 | 0 |
| 0 | 97  | 64    | 36    | 100    | 36.8  | 0.6   | 25 | 0 |
| 3 | 113 | 50    | 10    | 85     | 29.5  | 0.626 | 25 | 0 |

|   |     |       |       |        |       |       |    |   |
|---|-----|-------|-------|--------|-------|-------|----|---|
| 5 | 78  | 48    | 29.15 | 155.55 | 33.7  | 0.654 | 25 | 0 |
| 2 | 100 | 70    | 52    | 57     | 40.5  | 0.677 | 25 | 0 |
| 0 | 107 | 62    | 30    | 74     | 36.6  | 0.757 | 25 | 1 |
| 0 | 162 | 76    | 56    | 100    | 53.2  | 0.759 | 25 | 1 |
| 2 | 87  | 72.41 | 23    | 155.55 | 28.9  | 0.773 | 25 | 0 |
| 0 | 138 | 72.41 | 29.15 | 155.55 | 36.3  | 0.933 | 25 | 1 |
| 1 | 90  | 62    | 18    | 59     | 25.1  | 1.268 | 25 | 0 |
| 0 | 128 | 68    | 19    | 180    | 30.5  | 1.391 | 25 | 1 |
| 2 | 127 | 58    | 24    | 275    | 27.7  | 1.6   | 25 | 0 |
| 2 | 82  | 52    | 22    | 115    | 28.5  | 1.699 | 25 | 0 |
| 0 | 180 | 66    | 39    | 155.55 | 42    | 1.893 | 25 | 1 |
| 3 | 173 | 82    | 48    | 465    | 38.4  | 2.137 | 25 | 1 |
| 0 | 180 | 78    | 63    | 14     | 59.4  | 2.42  | 25 | 1 |
| 6 | 114 | 72.41 | 29.15 | 155.55 | 32.46 | 0.189 | 26 | 0 |
| 1 | 106 | 76    | 29.15 | 155.55 | 37.5  | 0.197 | 26 | 0 |
| 0 | 101 | 76    | 29.15 | 155.55 | 35.7  | 0.198 | 26 | 0 |
| 0 | 181 | 88    | 44    | 510    | 43.3  | 0.222 | 26 | 1 |
| 3 | 78  | 50    | 32    | 88     | 31    | 0.248 | 26 | 1 |
| 0 | 165 | 76    | 43    | 255    | 47.9  | 0.259 | 26 | 0 |
| 0 | 131 | 72.41 | 29.15 | 155.55 | 43.2  | 0.27  | 26 | 1 |
| 3 | 180 | 64    | 25    | 70     | 34    | 0.271 | 26 | 0 |
| 3 | 99  | 62    | 19    | 74     | 21.8  | 0.279 | 26 | 0 |
| 0 | 135 | 94    | 46    | 145    | 40.6  | 0.284 | 26 | 0 |
| 0 | 120 | 74    | 18    | 63     | 30.5  | 0.285 | 26 | 0 |
| 3 | 124 | 80    | 33    | 130    | 33.2  | 0.305 | 26 | 0 |
| 2 | 112 | 68    | 22    | 94     | 34.1  | 0.315 | 26 | 0 |
| 0 | 129 | 110   | 46    | 130    | 67.1  | 0.319 | 26 | 1 |
| 2 | 100 | 68    | 25    | 71     | 38.5  | 0.324 | 26 | 0 |
| 0 | 95  | 80    | 45    | 92     | 36.5  | 0.33  | 26 | 0 |
| 4 | 96  | 56    | 17    | 49     | 20.8  | 0.34  | 26 | 0 |
| 0 | 162 | 76    | 36    | 155.55 | 49.6  | 0.364 | 26 | 1 |
| 3 | 102 | 44    | 20    | 94     | 30.8  | 0.4   | 26 | 0 |
| 1 | 109 | 38    | 18    | 120    | 23.1  | 0.407 | 26 | 0 |
| 5 | 139 | 64    | 35    | 140    | 28.6  | 0.411 | 26 | 0 |
| 1 | 71  | 62    | 29.15 | 155.55 | 21.8  | 0.416 | 26 | 0 |
| 4 | 171 | 72    | 29.15 | 155.55 | 43.6  | 0.479 | 26 | 1 |
| 2 | 122 | 76    | 27    | 200    | 35.9  | 0.483 | 26 | 0 |
| 1 | 88  | 30    | 42    | 99     | 55    | 0.496 | 26 | 1 |
| 1 | 119 | 88    | 41    | 170    | 45.3  | 0.507 | 26 | 0 |
| 2 | 123 | 48    | 32    | 165    | 42.1  | 0.52  | 26 | 0 |
| 1 | 101 | 50    | 15    | 36     | 24.2  | 0.526 | 26 | 0 |
| 2 | 96  | 68    | 13    | 49     | 21.1  | 0.647 | 26 | 0 |
| 1 | 100 | 66    | 15    | 56     | 23.6  | 0.666 | 26 | 0 |
| 6 | 105 | 80    | 28    | 155.55 | 32.5  | 0.878 | 26 | 0 |
| 4 | 118 | 70    | 29.15 | 155.55 | 44.5  | 0.904 | 26 | 0 |
| 4 | 109 | 64    | 44    | 99     | 34.8  | 0.905 | 26 | 1 |
| 4 | 110 | 76    | 20    | 100    | 28.4  | 0.118 | 27 | 0 |
| 0 | 114 | 80    | 34    | 285    | 44.2  | 0.167 | 27 | 0 |
| 4 | 146 | 85    | 27    | 100    | 28.9  | 0.189 | 27 | 0 |
| 6 | 109 | 60    | 27    | 155.55 | 25    | 0.206 | 27 | 0 |
| 1 | 96  | 122   | 29.15 | 155.55 | 22.4  | 0.207 | 27 | 0 |

|   |     |       |       |        |      |       |    |   |
|---|-----|-------|-------|--------|------|-------|----|---|
| 3 | 106 | 72    | 29.15 | 155.55 | 25.8 | 0.207 | 27 | 0 |
| 2 | 99  | 70    | 16    | 44     | 20.4 | 0.235 | 27 | 0 |
| 5 | 73  | 60    | 29.15 | 155.55 | 26.8 | 0.268 | 27 | 0 |
| 0 | 152 | 82    | 39    | 272    | 41.5 | 0.27  | 27 | 0 |
| 2 | 129 | 84    | 29.15 | 155.55 | 28   | 0.284 | 27 | 0 |
| 2 | 122 | 70    | 27    | 155.55 | 36.8 | 0.34  | 27 | 0 |
| 5 | 166 | 76    | 29.15 | 155.55 | 45.7 | 0.34  | 27 | 1 |
| 1 | 147 | 94    | 41    | 155.55 | 49.3 | 0.358 | 27 | 1 |
| 5 | 95  | 72    | 33    | 155.55 | 37.7 | 0.37  | 27 | 0 |
| 5 | 111 | 72    | 28    | 155.55 | 23.9 | 0.407 | 27 | 0 |
| 2 | 155 | 74    | 17    | 96     | 26.6 | 0.433 | 27 | 1 |
| 2 | 120 | 54    | 29.15 | 155.55 | 26.8 | 0.455 | 27 | 0 |
| 1 | 117 | 60    | 23    | 106    | 33.8 | 0.466 | 27 | 0 |
| 2 | 90  | 68    | 42    | 155.55 | 38.2 | 0.503 | 27 | 1 |
| 4 | 125 | 80    | 29.15 | 155.55 | 32.3 | 0.536 | 27 | 1 |
| 3 | 128 | 72    | 25    | 190    | 32.4 | 0.549 | 27 | 1 |
| 6 | 154 | 78    | 41    | 140    | 46.1 | 0.571 | 27 | 0 |
| 0 | 104 | 76    | 29.15 | 155.55 | 18.4 | 0.582 | 27 | 0 |
| 0 | 91  | 80    | 29.15 | 155.55 | 32.4 | 0.601 | 27 | 0 |
| 1 | 83  | 68    | 29.15 | 155.55 | 18.2 | 0.624 | 27 | 0 |
| 0 | 102 | 86    | 17    | 105    | 29.3 | 0.695 | 27 | 0 |
| 2 | 110 | 74    | 29    | 125    | 32.4 | 0.698 | 27 | 0 |
| 3 | 126 | 88    | 41    | 235    | 39.3 | 0.704 | 27 | 0 |
| 3 | 103 | 72    | 30    | 152    | 27.6 | 0.73  | 27 | 0 |
| 3 | 141 | 72.41 | 29.15 | 155.55 | 30   | 0.761 | 27 | 1 |
| 2 | 85  | 65    | 29.15 | 155.55 | 39.6 | 0.93  | 27 | 0 |
| 3 | 80  | 82    | 31    | 70     | 34.2 | 1.292 | 27 | 1 |
| 1 | 100 | 74    | 12    | 46     | 19.5 | 0.149 | 28 | 0 |
| 3 | 115 | 66    | 39    | 140    | 38.1 | 0.15  | 28 | 0 |
| 5 | 105 | 72    | 29    | 325    | 36.9 | 0.159 | 28 | 0 |
| 4 | 131 | 68    | 21    | 166    | 33.1 | 0.16  | 28 | 0 |
| 6 | 80  | 80    | 36    | 155.55 | 39.8 | 0.177 | 28 | 0 |
| 6 | 92  | 92    | 29.15 | 155.55 | 19.9 | 0.188 | 28 | 0 |
| 6 | 96  | 72.41 | 29.15 | 155.55 | 23.7 | 0.19  | 28 | 0 |
| 5 | 115 | 98    | 29.15 | 155.55 | 52.9 | 0.209 | 28 | 1 |
| 3 | 129 | 64    | 29    | 115    | 26.4 | 0.219 | 28 | 1 |
| 1 | 138 | 82    | 29.15 | 155.55 | 40.1 | 0.236 | 28 | 0 |
| 2 | 146 | 72.41 | 29.15 | 155.55 | 27.5 | 0.24  | 28 | 1 |
| 2 | 112 | 86    | 42    | 160    | 38.4 | 0.246 | 28 | 0 |
| 1 | 121 | 78    | 39    | 74     | 39   | 0.261 | 28 | 0 |
| 3 | 84  | 72    | 32    | 155.55 | 37.2 | 0.267 | 28 | 0 |
| 3 | 163 | 70    | 18    | 105    | 31.6 | 0.268 | 28 | 1 |
| 5 | 123 | 74    | 40    | 77     | 34.1 | 0.269 | 28 | 0 |
| 4 | 95  | 60    | 32    | 155.55 | 35.4 | 0.284 | 28 | 0 |
| 4 | 99  | 72    | 17    | 155.55 | 25.6 | 0.294 | 28 | 0 |
| 4 | 85  | 58    | 22    | 49     | 27.8 | 0.306 | 28 | 0 |
| 0 | 146 | 70    | 29.15 | 155.55 | 37.9 | 0.334 | 28 | 1 |
| 5 | 147 | 75    | 29.15 | 155.55 | 29.9 | 0.434 | 28 | 0 |
| 1 | 84  | 64    | 23    | 115    | 36.9 | 0.471 | 28 | 0 |
| 0 | 198 | 66    | 32    | 274    | 41.3 | 0.502 | 28 | 1 |
| 4 | 127 | 88    | 11    | 155    | 34.5 | 0.598 | 28 | 0 |

|    |     |       |       |        |       |       |    |   |
|----|-----|-------|-------|--------|-------|-------|----|---|
| 1  | 144 | 82    | 40    | 155.55 | 41.3  | 0.607 | 28 | 0 |
| 1  | 100 | 72    | 12    | 70     | 25.3  | 0.658 | 28 | 0 |
| 6  | 102 | 90    | 39    | 155.55 | 35.7  | 0.674 | 28 | 0 |
| 6  | 151 | 62    | 31    | 120    | 35.5  | 0.692 | 28 | 0 |
| 1  | 172 | 68    | 49    | 579    | 42.4  | 0.702 | 28 | 1 |
| 2  | 122 | 52    | 43    | 158    | 36.2  | 0.816 | 28 | 0 |
| 3  | 158 | 76    | 36    | 245    | 31.6  | 0.851 | 28 | 1 |
| 2  | 100 | 66    | 20    | 90     | 32.9  | 0.867 | 28 | 1 |
| 3  | 100 | 68    | 23    | 81     | 31.6  | 0.949 | 28 | 0 |
| 1  | 125 | 50    | 40    | 167    | 33.3  | 0.962 | 28 | 1 |
| 2  | 92  | 76    | 20    | 155.55 | 24.2  | 1.698 | 28 | 0 |
| 10 | 115 | 72.41 | 29.15 | 155.55 | 35.3  | 0.134 | 29 | 0 |
| 4  | 148 | 60    | 27    | 318    | 30.9  | 0.15  | 29 | 1 |
| 2  | 139 | 75    | 29.15 | 155.55 | 25.6  | 0.167 | 29 | 0 |
| 1  | 107 | 50    | 19    | 155.55 | 28.3  | 0.181 | 29 | 0 |
| 0  | 123 | 88    | 37    | 155.55 | 35.2  | 0.197 | 29 | 0 |
| 0  | 141 | 72.41 | 29.15 | 155.55 | 42.4  | 0.205 | 29 | 1 |
| 2  | 120 | 76    | 37    | 105    | 39.7  | 0.215 | 29 | 0 |
| 4  | 92  | 80    | 29.15 | 155.55 | 42.2  | 0.237 | 29 | 0 |
| 6  | 103 | 66    | 29.15 | 155.55 | 24.3  | 0.249 | 29 | 0 |
| 9  | 119 | 80    | 35    | 155.55 | 29    | 0.263 | 29 | 1 |
| 7  | 106 | 60    | 24    | 155.55 | 26.5  | 0.296 | 29 | 1 |
| 2  | 146 | 76    | 35    | 194    | 38.2  | 0.329 | 29 | 0 |
| 2  | 146 | 70    | 38    | 360    | 28    | 0.337 | 29 | 1 |
| 3  | 182 | 74    | 29.15 | 155.55 | 30.5  | 0.345 | 29 | 1 |
| 4  | 90  | 88    | 47    | 54     | 37.7  | 0.362 | 29 | 0 |
| 1  | 88  | 78    | 29    | 76     | 32    | 0.365 | 29 | 0 |
| 6  | 124 | 72    | 29.15 | 155.55 | 27.6  | 0.368 | 29 | 1 |
| 4  | 122 | 68    | 29.15 | 155.55 | 35    | 0.394 | 29 | 0 |
| 5  | 158 | 84    | 41    | 210    | 39.4  | 0.395 | 29 | 1 |
| 4  | 110 | 66    | 29.15 | 155.55 | 31.9  | 0.471 | 29 | 0 |
| 3  | 111 | 90    | 12    | 78     | 28.4  | 0.495 | 29 | 0 |
| 6  | 134 | 70    | 23    | 130    | 35.4  | 0.542 | 29 | 1 |
| 1  | 146 | 56    | 29.15 | 155.55 | 29.7  | 0.564 | 29 | 0 |
| 5  | 189 | 64    | 33    | 325    | 31.2  | 0.583 | 29 | 1 |
| 0  | 129 | 80    | 29.15 | 155.55 | 31.2  | 0.703 | 29 | 0 |
| 2  | 105 | 80    | 45    | 191    | 33.7  | 0.711 | 29 | 1 |
| 1  | 119 | 86    | 39    | 220    | 45.6  | 0.808 | 29 | 1 |
| 1  | 196 | 76    | 36    | 249    | 36.5  | 0.875 | 29 | 1 |
| 1  | 86  | 66    | 52    | 65     | 41.3  | 0.917 | 29 | 0 |
| 1  | 124 | 74    | 36    | 155.55 | 27.8  | 0.1   | 30 | 0 |
| 2  | 157 | 74    | 35    | 440    | 39.4  | 0.134 | 30 | 0 |
| 6  | 117 | 96    | 29.15 | 155.55 | 28.7  | 0.157 | 30 | 0 |
| 4  | 110 | 92    | 29.15 | 155.55 | 37.6  | 0.191 | 30 | 0 |
| 5  | 116 | 74    | 29.15 | 155.55 | 25.6  | 0.201 | 30 | 0 |
| 1  | 97  | 70    | 40    | 155.55 | 38.1  | 0.218 | 30 | 0 |
| 5  | 121 | 72    | 23    | 112    | 26.2  | 0.245 | 30 | 0 |
| 4  | 137 | 84    | 29.15 | 155.55 | 31.2  | 0.252 | 30 | 0 |
| 10 | 115 | 72.41 | 29.15 | 155.55 | 32.46 | 0.261 | 30 | 1 |
| 3  | 99  | 80    | 11    | 64     | 19.3  | 0.284 | 30 | 0 |
| 5  | 110 | 68    | 29.15 | 155.55 | 26    | 0.292 | 30 | 0 |



|    |     |       |       |        |      |       |    |   |
|----|-----|-------|-------|--------|------|-------|----|---|
| 5  | 88  | 66    | 21    | 23     | 24.4 | 0.342 | 30 | 0 |
| 3  | 170 | 64    | 37    | 225    | 34.5 | 0.356 | 30 | 1 |
| 4  | 117 | 62    | 12    | 155.55 | 29.7 | 0.38  | 30 | 1 |
| 4  | 147 | 74    | 25    | 293    | 34.9 | 0.385 | 30 | 0 |
| 3  | 120 | 70    | 30    | 135    | 42.9 | 0.452 | 30 | 0 |
| 5  | 99  | 54    | 28    | 83     | 34   | 0.499 | 30 | 0 |
| 3  | 111 | 56    | 39    | 155.55 | 30.1 | 0.557 | 30 | 0 |
| 1  | 122 | 64    | 32    | 156    | 35.1 | 0.692 | 30 | 1 |
| 0  | 167 | 72.41 | 29.15 | 155.55 | 32.3 | 0.839 | 30 | 1 |
| 2  | 124 | 68    | 28    | 205    | 32.9 | 0.875 | 30 | 1 |
| 2  | 125 | 60    | 20    | 140    | 33.8 | 0.088 | 31 | 0 |
| 4  | 95  | 64    | 29.15 | 155.55 | 32   | 0.161 | 31 | 1 |
| 10 | 92  | 62    | 29.15 | 155.55 | 25.9 | 0.167 | 31 | 0 |
| 7  | 107 | 74    | 29.15 | 155.55 | 29.6 | 0.254 | 31 | 1 |
| 4  | 184 | 78    | 39    | 277    | 37   | 0.264 | 31 | 1 |
| 3  | 169 | 74    | 19    | 125    | 29.9 | 0.268 | 31 | 1 |
| 1  | 122 | 90    | 51    | 220    | 49.7 | 0.325 | 31 | 1 |
| 6  | 195 | 70    | 29.15 | 155.55 | 30.9 | 0.328 | 31 | 1 |
| 7  | 103 | 66    | 32    | 155.55 | 39.1 | 0.344 | 31 | 1 |
| 1  | 85  | 66    | 29    | 155.55 | 26.6 | 0.351 | 31 | 0 |
| 7  | 114 | 76    | 17    | 110    | 23.8 | 0.466 | 31 | 0 |
| 6  | 91  | 72.41 | 29.15 | 155.55 | 29.8 | 0.501 | 31 | 0 |
| 4  | 129 | 60    | 12    | 231    | 27.5 | 0.527 | 31 | 0 |
| 0  | 118 | 84    | 47    | 230    | 45.8 | 0.551 | 31 | 1 |
| 4  | 90  | 72.41 | 29.15 | 155.55 | 28   | 0.61  | 31 | 0 |
| 0  | 145 | 72.41 | 29.15 | 155.55 | 44.2 | 0.63  | 31 | 1 |
| 8  | 109 | 76    | 39    | 114    | 27.9 | 0.64  | 31 | 1 |
| 0  | 111 | 65    | 29.15 | 155.55 | 24.6 | 0.66  | 31 | 0 |
| 6  | 107 | 88    | 29.15 | 155.55 | 36.8 | 0.727 | 31 | 0 |
| 4  | 158 | 78    | 29.15 | 155.55 | 32.9 | 0.803 | 31 | 1 |
| 0  | 100 | 88    | 60    | 110    | 46.8 | 0.962 | 31 | 0 |
| 3  | 173 | 78    | 39    | 185    | 33.8 | 0.97  | 31 | 1 |
| 2  | 128 | 78    | 37    | 182    | 43.3 | 1.224 | 31 | 1 |
| 4  | 197 | 70    | 39    | 744    | 36.7 | 2.329 | 31 | 0 |
| 6  | 87  | 80    | 29.15 | 155.55 | 23.2 | 0.084 | 32 | 0 |
| 3  | 102 | 74    | 29.15 | 155.55 | 29.5 | 0.121 | 32 | 0 |
| 5  | 99  | 74    | 27    | 155.55 | 29   | 0.203 | 32 | 0 |
| 4  | 156 | 75    | 29.15 | 155.55 | 48.3 | 0.238 | 32 | 1 |
| 6  | 125 | 68    | 30    | 120    | 30   | 0.464 | 32 | 0 |
| 7  | 100 | 72.41 | 29.15 | 155.55 | 30   | 0.484 | 32 | 1 |
| 6  | 99  | 60    | 19    | 54     | 26.9 | 0.497 | 32 | 0 |
| 1  | 115 | 70    | 30    | 96     | 34.6 | 0.529 | 32 | 1 |
| 8  | 183 | 64    | 29.15 | 155.55 | 23.3 | 0.672 | 32 | 1 |
| 0  | 131 | 88    | 29.15 | 155.55 | 31.6 | 0.743 | 32 | 1 |
| 0  | 108 | 68    | 20    | 155.55 | 27.3 | 0.787 | 32 | 0 |
| 9  | 164 | 84    | 21    | 155.55 | 30.8 | 0.831 | 32 | 1 |
| 7  | 97  | 76    | 32    | 91     | 40.9 | 0.871 | 32 | 1 |
| 3  | 129 | 92    | 49    | 155    | 36.4 | 0.968 | 32 | 1 |
| 1  | 81  | 74    | 41    | 57     | 46.3 | 1.096 | 32 | 0 |
| 5  | 85  | 74    | 22    | 155.55 | 29   | 1.224 | 32 | 1 |
| 9  | 89  | 62    | 29.15 | 155.55 | 22.5 | 0.142 | 33 | 0 |

|    |     |       |       |        |      |       |    |   |
|----|-----|-------|-------|--------|------|-------|----|---|
| 4  | 99  | 68    | 38    | 155.55 | 32.8 | 0.145 | 33 | 0 |
| 1  | 103 | 30    | 38    | 83     | 43.3 | 0.183 | 33 | 0 |
| 0  | 121 | 66    | 30    | 165    | 34.3 | 0.203 | 33 | 1 |
| 5  | 108 | 72    | 43    | 75     | 36.1 | 0.263 | 33 | 0 |
| 5  | 122 | 86    | 29.15 | 155.55 | 34.7 | 0.29  | 33 | 0 |
| 4  | 173 | 70    | 14    | 168    | 29.7 | 0.361 | 33 | 1 |
| 2  | 75  | 64    | 24    | 55     | 29.7 | 0.37  | 33 | 0 |
| 1  | 167 | 74    | 17    | 144    | 23.4 | 0.447 | 33 | 1 |
| 9  | 152 | 78    | 34    | 171    | 34.2 | 0.893 | 33 | 1 |
| 8  | 108 | 70    | 29.15 | 155.55 | 30.5 | 0.955 | 33 | 1 |
| 4  | 103 | 60    | 33    | 192    | 24   | 0.966 | 33 | 0 |
| 9  | 122 | 56    | 29.15 | 155.55 | 33.3 | 1.114 | 33 | 1 |
| 1  | 163 | 72    | 29.15 | 155.55 | 39   | 1.222 | 33 | 1 |
| 6  | 119 | 50    | 22    | 176    | 27.1 | 1.318 | 33 | 1 |
| 1  | 128 | 98    | 41    | 58     | 32   | 1.321 | 33 | 1 |
| 0  | 137 | 40    | 35    | 168    | 43.1 | 2.288 | 33 | 1 |
| 9  | 124 | 70    | 33    | 402    | 35.4 | 0.282 | 34 | 0 |
| 3  | 191 | 68    | 15    | 130    | 30.9 | 0.299 | 34 | 0 |
| 4  | 83  | 86    | 19    | 155.55 | 29.3 | 0.317 | 34 | 0 |
| 3  | 130 | 78    | 23    | 79     | 28.4 | 0.323 | 34 | 1 |
| 4  | 123 | 80    | 15    | 176    | 32   | 0.443 | 34 | 0 |
| 10 | 168 | 74    | 29.15 | 155.55 | 38   | 0.537 | 34 | 1 |
| 5  | 155 | 84    | 44    | 545    | 38.7 | 0.619 | 34 | 0 |
| 4  | 120 | 68    | 29.15 | 155.55 | 29.6 | 0.709 | 34 | 0 |
| 7  | 114 | 64    | 29.15 | 155.55 | 27.4 | 0.732 | 34 | 1 |
| 6  | 123 | 72    | 45    | 230    | 33.6 | 0.733 | 34 | 0 |
| 7  | 187 | 50    | 33    | 392    | 33.9 | 0.826 | 34 | 1 |
| 8  | 107 | 80    | 29.15 | 155.55 | 24.6 | 0.856 | 34 | 0 |
| 10 | 115 | 98    | 29.15 | 155.55 | 24   | 1.022 | 34 | 0 |
| 2  | 106 | 64    | 35    | 119    | 30.5 | 1.4   | 34 | 0 |
| 5  | 77  | 82    | 41    | 42     | 35.8 | 0.156 | 35 | 0 |
| 4  | 123 | 62    | 29.15 | 155.55 | 32   | 0.226 | 35 | 1 |
| 5  | 136 | 84    | 41    | 88     | 35   | 0.286 | 35 | 1 |
| 11 | 85  | 74    | 29.15 | 155.55 | 30.1 | 0.3   | 35 | 0 |
| 0  | 180 | 90    | 26    | 90     | 36.5 | 0.314 | 35 | 1 |
| 3  | 158 | 70    | 30    | 328    | 35.5 | 0.344 | 35 | 1 |
| 11 | 138 | 76    | 29.15 | 155.55 | 33.2 | 0.42  | 35 | 0 |
| 5  | 116 | 74    | 29    | 155.55 | 32.3 | 0.66  | 35 | 1 |
| 6  | 108 | 44    | 20    | 130    | 24   | 0.813 | 35 | 0 |
| 0  | 93  | 100   | 39    | 72     | 43.4 | 1.021 | 35 | 0 |
| 6  | 102 | 82    | 29.15 | 155.55 | 30.8 | 0.18  | 36 | 1 |
| 4  | 183 | 72.41 | 29.15 | 155.55 | 28.4 | 0.212 | 36 | 1 |
| 10 | 133 | 68    | 29.15 | 155.55 | 27   | 0.245 | 36 | 0 |
| 0  | 124 | 70    | 20    | 155.55 | 27.4 | 0.254 | 36 | 1 |
| 9  | 112 | 82    | 32    | 175    | 34.2 | 0.26  | 36 | 1 |
| 4  | 151 | 90    | 38    | 155.55 | 29.7 | 0.294 | 36 | 0 |
| 7  | 152 | 88    | 44    | 155.55 | 50   | 0.337 | 36 | 1 |
| 7  | 159 | 66    | 29.15 | 155.55 | 30.4 | 0.383 | 36 | 1 |
| 3  | 187 | 70    | 22    | 200    | 36.4 | 0.408 | 36 | 1 |
| 8  | 151 | 78    | 32    | 210    | 42.9 | 0.516 | 36 | 1 |
| 5  | 44  | 62    | 29.15 | 155.55 | 25   | 0.587 | 36 | 0 |

|    |        |       |       |        |      |       |    |   |
|----|--------|-------|-------|--------|------|-------|----|---|
| 3  | 174    | 58    | 22    | 194    | 32.9 | 0.593 | 36 | 1 |
| 1  | 95     | 74    | 21    | 73     | 25.9 | 0.673 | 36 | 0 |
| 8  | 179    | 72    | 42    | 130    | 32.7 | 0.719 | 36 | 1 |
| 7  | 83     | 78    | 26    | 71     | 29.3 | 0.767 | 36 | 0 |
| 1  | 90     | 68    | 8     | 155.55 | 24.5 | 1.138 | 36 | 0 |
| 6  | 105    | 70    | 32    | 68     | 30.8 | 0.122 | 37 | 0 |
| 7  | 124    | 70    | 33    | 215    | 25.5 | 0.161 | 37 | 0 |
| 10 | 179    | 70    | 29.15 | 155.55 | 35.1 | 0.2   | 37 | 0 |
| 3  | 150    | 76    | 29.15 | 155.55 | 21   | 0.207 | 37 | 0 |
| 7  | 119    | 72.41 | 29.15 | 155.55 | 25.2 | 0.209 | 37 | 0 |
| 5  | 137    | 108   | 29.15 | 155.55 | 48.8 | 0.227 | 37 | 1 |
| 5  | 88     | 78    | 30    | 155.55 | 27.6 | 0.258 | 37 | 0 |
| 7  | 133    | 88    | 15    | 155    | 32.4 | 0.262 | 37 | 0 |
| 4  | 144    | 58    | 28    | 140    | 29.5 | 0.287 | 37 | 0 |
| 4  | 154    | 72    | 29    | 126    | 31.3 | 0.338 | 37 | 0 |
| 5  | 121.69 | 80    | 32    | 155.55 | 41   | 0.346 | 37 | 1 |
| 8  | 186    | 90    | 35    | 225    | 34.5 | 0.423 | 37 | 1 |
| 4  | 114    | 65    | 29.15 | 155.55 | 21.9 | 0.432 | 37 | 0 |
| 4  | 116    | 72    | 12    | 87     | 22.1 | 0.463 | 37 | 0 |
| 4  | 144    | 82    | 32    | 155.55 | 38.5 | 0.554 | 37 | 1 |
| 4  | 189    | 110   | 31    | 155.55 | 28.5 | 0.68  | 37 | 0 |
| 7  | 133    | 84    | 29.15 | 155.55 | 40.2 | 0.696 | 37 | 0 |
| 5  | 130    | 82    | 29.15 | 155.55 | 39.1 | 0.956 | 37 | 1 |
| 1  | 128    | 88    | 39    | 110    | 36.5 | 1.057 | 37 | 1 |
| 1  | 173    | 74    | 29.15 | 155.55 | 36.8 | 0.088 | 38 | 1 |
| 8  | 120    | 72.41 | 29.15 | 155.55 | 30   | 0.183 | 38 | 1 |
| 14 | 175    | 62    | 30    | 155.55 | 33.6 | 0.212 | 38 | 1 |
| 5  | 124    | 74    | 29.15 | 155.55 | 34   | 0.22  | 38 | 1 |
| 4  | 112    | 78    | 40    | 155.55 | 39.4 | 0.236 | 38 | 0 |
| 10 | 75     | 82    | 29.15 | 155.55 | 33.3 | 0.263 | 38 | 0 |
| 9  | 72     | 78    | 25    | 155.55 | 31.6 | 0.28  | 38 | 0 |
| 5  | 106    | 82    | 30    | 155.55 | 39.5 | 0.286 | 38 | 0 |
| 1  | 181    | 64    | 30    | 180    | 34.1 | 0.328 | 38 | 1 |
| 5  | 117    | 92    | 29.15 | 155.55 | 34.1 | 0.337 | 38 | 0 |
| 10 | 129    | 62    | 36    | 155.55 | 41.2 | 0.441 | 38 | 1 |
| 13 | 104    | 72    | 29.15 | 155.55 | 31.2 | 0.465 | 38 | 1 |
| 3  | 89     | 74    | 16    | 85     | 30.4 | 0.551 | 38 | 0 |
| 12 | 151    | 70    | 40    | 271    | 41.8 | 0.742 | 38 | 1 |
| 0  | 109    | 88    | 30    | 155.55 | 32.5 | 0.855 | 38 | 1 |
| 10 | 101    | 86    | 37    | 155.55 | 45.6 | 1.136 | 38 | 1 |
| 8  | 126    | 74    | 38    | 75     | 25.9 | 0.162 | 39 | 0 |
| 3  | 78     | 70    | 29.15 | 155.55 | 32.5 | 0.27  | 39 | 0 |
| 8  | 133    | 72    | 29.15 | 155.55 | 32.9 | 0.27  | 39 | 1 |
| 10 | 129    | 76    | 28    | 122    | 35.9 | 0.28  | 39 | 0 |
| 7  | 137    | 90    | 41    | 155.55 | 32   | 0.391 | 39 | 0 |
| 8  | 84     | 74    | 31    | 155.55 | 38.3 | 0.457 | 39 | 0 |
| 7  | 160    | 54    | 32    | 175    | 30.5 | 0.588 | 39 | 1 |
| 8  | 74     | 70    | 40    | 49     | 35.3 | 0.705 | 39 | 0 |
| 6  | 154    | 74    | 32    | 193    | 29.3 | 0.839 | 39 | 0 |
| 3  | 96     | 56    | 34    | 115    | 24.7 | 0.944 | 39 | 0 |
| 13 | 153    | 88    | 37    | 140    | 40.6 | 1.174 | 39 | 0 |

|    |        |       |       |        |      |       |    |   |
|----|--------|-------|-------|--------|------|-------|----|---|
| 8  | 197    | 74    | 29.15 | 155.55 | 25.9 | 1.191 | 39 | 1 |
| 10 | 111    | 70    | 27    | 155.55 | 27.5 | 0.141 | 40 | 1 |
| 3  | 96     | 78    | 39    | 155.55 | 37.3 | 0.238 | 40 | 0 |
| 4  | 141    | 74    | 29.15 | 155.55 | 27.6 | 0.244 | 40 | 0 |
| 6  | 115    | 60    | 39    | 155.55 | 33.7 | 0.245 | 40 | 1 |
| 3  | 122    | 78    | 29.15 | 155.55 | 23   | 0.254 | 40 | 0 |
| 6  | 144    | 72    | 27    | 228    | 33.9 | 0.255 | 40 | 0 |
| 7  | 159    | 64    | 29.15 | 155.55 | 27.4 | 0.294 | 40 | 0 |
| 9  | 123    | 70    | 44    | 94     | 33.1 | 0.374 | 40 | 0 |
| 1  | 117    | 88    | 24    | 145    | 34.5 | 0.403 | 40 | 1 |
| 5  | 126    | 78    | 27    | 22     | 29.6 | 0.439 | 40 | 0 |
| 11 | 135    | 72.41 | 29.15 | 155.55 | 52.3 | 0.578 | 40 | 1 |
| 9  | 145    | 80    | 46    | 130    | 37.9 | 0.637 | 40 | 1 |
| 7  | 168    | 88    | 42    | 321    | 38.2 | 0.787 | 40 | 1 |
| 9  | 57     | 80    | 37    | 155.55 | 32.8 | 0.096 | 41 | 0 |
| 8  | 143    | 66    | 29.15 | 155.55 | 34.9 | 0.129 | 41 | 1 |
| 5  | 168    | 64    | 29.15 | 155.55 | 32.9 | 0.135 | 41 | 1 |
| 13 | 76     | 60    | 29.15 | 155.55 | 32.8 | 0.18  | 41 | 0 |
| 10 | 125    | 70    | 26    | 115    | 31.1 | 0.205 | 41 | 1 |
| 12 | 140    | 85    | 33    | 155.55 | 37.4 | 0.244 | 41 | 0 |
| 7  | 187    | 68    | 39    | 304    | 37.7 | 0.254 | 41 | 1 |
| 10 | 122    | 68    | 29.15 | 155.55 | 31.2 | 0.258 | 41 | 0 |
| 5  | 112    | 66    | 29.15 | 155.55 | 37.8 | 0.261 | 41 | 1 |
| 1  | 180    | 72.41 | 29.15 | 155.55 | 43.3 | 0.282 | 41 | 1 |
| 2  | 129    | 72.41 | 29.15 | 155.55 | 38.5 | 0.304 | 41 | 0 |
| 6  | 80     | 66    | 30    | 155.55 | 26.2 | 0.313 | 41 | 0 |
| 7  | 178    | 84    | 29.15 | 155.55 | 39.9 | 0.331 | 41 | 1 |
| 7  | 184    | 84    | 33    | 155.55 | 35.5 | 0.355 | 41 | 1 |
| 7  | 62     | 78    | 29.15 | 155.55 | 32.6 | 0.391 | 41 | 0 |
| 0  | 189    | 104   | 25    | 155.55 | 34.3 | 0.435 | 41 | 1 |
| 7  | 196    | 90    | 29.15 | 155.55 | 39.8 | 0.451 | 41 | 1 |
| 6  | 104    | 74    | 18    | 156    | 29.9 | 0.722 | 41 | 1 |
| 6  | 121.69 | 68    | 41    | 155.55 | 39   | 0.727 | 41 | 1 |
| 7  | 94     | 64    | 25    | 79     | 33.3 | 0.738 | 41 | 0 |
| 7  | 194    | 68    | 28    | 155.55 | 35.9 | 0.745 | 41 | 1 |
| 1  | 120    | 80    | 48    | 200    | 38.9 | 1.162 | 41 | 0 |
| 11 | 103    | 68    | 40    | 155.55 | 46.2 | 0.126 | 42 | 0 |
| 8  | 85     | 55    | 20    | 155.55 | 24.4 | 0.136 | 42 | 0 |
| 8  | 100    | 76    | 29.15 | 155.55 | 38.7 | 0.19  | 42 | 0 |
| 5  | 117    | 86    | 30    | 105    | 39.1 | 0.251 | 42 | 0 |
| 7  | 114    | 66    | 29.15 | 155.55 | 32.8 | 0.258 | 42 | 1 |
| 11 | 136    | 84    | 35    | 130    | 28.3 | 0.26  | 42 | 1 |
| 7  | 81     | 78    | 40    | 48     | 46.7 | 0.261 | 42 | 0 |
| 10 | 108    | 66    | 29.15 | 155.55 | 32.4 | 0.272 | 42 | 1 |
| 2  | 89     | 90    | 30    | 155.55 | 33.5 | 0.292 | 42 | 0 |
| 1  | 102    | 74    | 29.15 | 155.55 | 39.5 | 0.293 | 42 | 1 |
| 1  | 149    | 68    | 29    | 127    | 29.3 | 0.349 | 42 | 1 |
| 9  | 106    | 52    | 29.15 | 155.55 | 31.2 | 0.38  | 42 | 0 |
| 6  | 85     | 78    | 29.15 | 155.55 | 31.2 | 0.382 | 42 | 0 |
| 1  | 100    | 66    | 29    | 196    | 32   | 0.444 | 42 | 0 |
| 13 | 126    | 90    | 29.15 | 155.55 | 43.4 | 0.583 | 42 | 1 |

|    |     |       |       |        |      |       |    |   |
|----|-----|-------|-------|--------|------|-------|----|---|
| 8  | 65  | 72    | 23    | 155.55 | 32   | 0.6   | 42 | 0 |
| 7  | 150 | 66    | 42    | 342    | 34.7 | 0.718 | 42 | 0 |
| 9  | 156 | 86    | 28    | 155    | 34.3 | 1.189 | 42 | 1 |
| 7  | 142 | 90    | 24    | 480    | 30.4 | 0.128 | 43 | 1 |
| 8  | 188 | 78    | 29.15 | 155.55 | 47.9 | 0.137 | 43 | 1 |
| 15 | 136 | 70    | 32    | 110    | 37.1 | 0.153 | 43 | 1 |
| 8  | 167 | 106   | 46    | 231    | 37.6 | 0.165 | 43 | 1 |
| 1  | 95  | 82    | 25    | 180    | 35   | 0.233 | 43 | 1 |
| 7  | 147 | 76    | 29.15 | 155.55 | 39.4 | 0.257 | 43 | 1 |
| 9  | 170 | 74    | 31    | 155.55 | 44   | 0.403 | 43 | 1 |
| 6  | 98  | 58    | 33    | 190    | 34   | 0.43  | 43 | 0 |
| 7  | 129 | 68    | 49    | 125    | 38.5 | 0.439 | 43 | 1 |
| 8  | 100 | 74    | 40    | 215    | 39.4 | 0.661 | 43 | 1 |
| 13 | 152 | 90    | 33    | 29     | 26.8 | 0.731 | 43 | 1 |
| 5  | 96  | 74    | 18    | 67     | 33.6 | 0.997 | 43 | 0 |
| 7  | 109 | 80    | 31    | 155.55 | 35.9 | 1.127 | 43 | 1 |
| 12 | 106 | 80    | 29.15 | 155.55 | 23.6 | 0.137 | 44 | 0 |
| 13 | 158 | 114   | 29.15 | 155.55 | 42.3 | 0.257 | 44 | 1 |
| 5  | 115 | 76    | 29.15 | 155.55 | 31.2 | 0.343 | 44 | 1 |
| 3  | 132 | 80    | 29.15 | 155.55 | 34.4 | 0.402 | 44 | 1 |
| 13 | 129 | 72.41 | 30    | 155.55 | 39.9 | 0.569 | 44 | 1 |
| 12 | 92  | 62    | 7     | 258    | 27.6 | 0.926 | 44 | 1 |
| 0  | 117 | 72.41 | 29.15 | 155.55 | 33.8 | 0.932 | 44 | 0 |
| 0  | 146 | 82    | 29.15 | 155.55 | 40.5 | 1.781 | 44 | 0 |
| 5  | 128 | 80    | 29.15 | 155.55 | 34.6 | 0.144 | 45 | 0 |
| 9  | 164 | 78    | 29.15 | 155.55 | 32.8 | 0.148 | 45 | 1 |
| 9  | 154 | 78    | 30    | 100    | 30.9 | 0.164 | 45 | 0 |
| 13 | 106 | 72    | 54    | 155.55 | 36.6 | 0.178 | 45 | 0 |
| 7  | 102 | 74    | 40    | 105    | 37.2 | 0.204 | 45 | 0 |
| 1  | 133 | 102   | 28    | 140    | 32.8 | 0.234 | 45 | 1 |
| 8  | 105 | 100   | 36    | 155.55 | 43.3 | 0.239 | 45 | 1 |
| 1  | 111 | 94    | 29.15 | 155.55 | 32.8 | 0.265 | 45 | 0 |
| 8  | 154 | 78    | 32    | 155.55 | 32.4 | 0.443 | 45 | 1 |
| 10 | 122 | 78    | 31    | 155.55 | 27.6 | 0.512 | 45 | 0 |
| 9  | 130 | 70    | 29.15 | 155.55 | 34.2 | 0.652 | 45 | 1 |
| 9  | 140 | 94    | 29.15 | 155.55 | 32.7 | 0.734 | 45 | 1 |
| 11 | 111 | 84    | 40    | 155.55 | 46.8 | 0.925 | 45 | 1 |
| 4  | 125 | 70    | 18    | 122    | 28.9 | 1.144 | 45 | 1 |
| 6  | 183 | 94    | 29.15 | 155.55 | 40.8 | 1.461 | 45 | 0 |
| 6  | 92  | 62    | 32    | 126    | 32   | 0.085 | 46 | 0 |
| 0  | 67  | 76    | 29.15 | 155.55 | 45.3 | 0.194 | 46 | 0 |
| 0  | 105 | 90    | 29.15 | 155.55 | 29.6 | 0.197 | 46 | 0 |
| 6  | 134 | 80    | 37    | 370    | 46.2 | 0.238 | 46 | 1 |
| 3  | 61  | 82    | 28    | 155.55 | 34.4 | 0.243 | 46 | 0 |
| 12 | 84  | 72    | 31    | 155.55 | 29.7 | 0.297 | 46 | 1 |
| 1  | 144 | 82    | 46    | 180    | 46.1 | 0.335 | 46 | 1 |
| 4  | 115 | 72    | 29.15 | 155.55 | 28.9 | 0.376 | 46 | 1 |
| 14 | 100 | 78    | 25    | 184    | 36.6 | 0.412 | 46 | 1 |
| 12 | 100 | 84    | 33    | 105    | 30   | 0.488 | 46 | 0 |
| 8  | 155 | 62    | 26    | 495    | 34   | 0.543 | 46 | 1 |
| 9  | 102 | 76    | 37    | 155.55 | 32.9 | 0.665 | 46 | 1 |

|    |     |     |       |        |       |       |    |   |
|----|-----|-----|-------|--------|-------|-------|----|---|
| 8  | 118 | 72  | 19    | 155.55 | 23.1  | 1.476 | 46 | 0 |
| 7  | 161 | 86  | 29.15 | 155.55 | 30.4  | 0.165 | 47 | 1 |
| 5  | 143 | 78  | 29.15 | 155.55 | 45    | 0.19  | 47 | 0 |
| 10 | 68  | 106 | 23    | 49     | 35.5  | 0.285 | 47 | 0 |
| 10 | 161 | 68  | 23    | 132    | 25.5  | 0.326 | 47 | 1 |
| 1  | 126 | 60  | 29.15 | 155.55 | 30.1  | 0.349 | 47 | 1 |
| 17 | 163 | 72  | 41    | 114    | 40.9  | 0.817 | 47 | 1 |
| 5  | 104 | 74  | 29.15 | 155.55 | 28.8  | 0.153 | 48 | 0 |
| 7  | 106 | 92  | 18    | 155.55 | 22.7  | 0.235 | 48 | 0 |
| 12 | 88  | 74  | 40    | 54     | 35.3  | 0.378 | 48 | 0 |
| 9  | 120 | 72  | 22    | 56     | 20.8  | 0.733 | 48 | 0 |
| 11 | 120 | 80  | 37    | 150    | 42.3  | 0.785 | 48 | 1 |
| 9  | 165 | 88  | 29.15 | 155.55 | 30.4  | 0.302 | 49 | 1 |
| 8  | 126 | 88  | 36    | 108    | 38.5  | 0.349 | 49 | 0 |
| 6  | 125 | 78  | 31    | 155.55 | 27.6  | 0.565 | 49 | 1 |
| 6  | 165 | 68  | 26    | 168    | 33.6  | 0.631 | 49 | 0 |
| 9  | 184 | 85  | 15    | 155.55 | 30    | 1.213 | 49 | 1 |
| 6  | 162 | 62  | 29.15 | 155.55 | 24.3  | 0.178 | 50 | 1 |
| 6  | 147 | 80  | 29.15 | 155.55 | 29.5  | 0.178 | 50 | 1 |
| 7  | 136 | 90  | 29.15 | 155.55 | 29.9  | 0.21  | 50 | 0 |
| 1  | 164 | 82  | 43    | 67     | 32.8  | 0.341 | 50 | 0 |
| 8  | 99  | 84  | 29.15 | 155.55 | 35.4  | 0.388 | 50 | 0 |
| 11 | 138 | 74  | 26    | 144    | 36.1  | 0.557 | 50 | 1 |
| 6  | 148 | 72  | 35    | 155.55 | 33.6  | 0.627 | 50 | 1 |
| 9  | 112 | 82  | 24    | 155.55 | 28.2  | 1.282 | 50 | 1 |
| 11 | 127 | 106 | 29.15 | 155.55 | 39    | 0.19  | 51 | 0 |
| 11 | 143 | 94  | 33    | 146    | 36.6  | 0.254 | 51 | 1 |
| 7  | 125 | 86  | 29.15 | 155.55 | 37.6  | 0.304 | 51 | 0 |
| 7  | 181 | 84  | 21    | 192    | 35.9  | 0.586 | 51 | 1 |
| 5  | 166 | 72  | 19    | 175    | 25.8  | 0.587 | 51 | 1 |
| 7  | 136 | 74  | 26    | 135    | 26    | 0.647 | 51 | 0 |
| 10 | 148 | 84  | 48    | 237    | 37.6  | 1.001 | 51 | 1 |
| 11 | 155 | 76  | 28    | 150    | 33.3  | 1.353 | 51 | 1 |
| 5  | 162 | 104 | 29.15 | 155.55 | 37.7  | 0.151 | 52 | 1 |
| 13 | 106 | 70  | 29.15 | 155.55 | 34.2  | 0.251 | 52 | 0 |
| 0  | 123 | 72  | 29.15 | 155.55 | 36.3  | 0.258 | 52 | 1 |
| 2  | 108 | 80  | 29.15 | 155.55 | 27    | 0.259 | 52 | 1 |
| 5  | 97  | 76  | 27    | 155.55 | 35.6  | 0.378 | 52 | 1 |
| 8  | 124 | 76  | 24    | 600    | 28.7  | 0.687 | 52 | 1 |
| 1  | 168 | 88  | 29    | 155.55 | 35    | 0.905 | 52 | 1 |
| 3  | 176 | 86  | 27    | 156    | 33.3  | 1.154 | 52 | 1 |
| 2  | 197 | 70  | 45    | 543    | 30.5  | 0.158 | 53 | 1 |
| 9  | 156 | 86  | 29.15 | 155.55 | 24.8  | 0.23  | 53 | 1 |
| 2  | 105 | 75  | 29.15 | 155.55 | 23.3  | 0.56  | 53 | 0 |
| 9  | 145 | 88  | 34    | 165    | 30.3  | 0.771 | 53 | 1 |
| 5  | 187 | 76  | 27    | 207    | 43.6  | 1.034 | 53 | 1 |
| 6  | 125 | 76  | 29.15 | 155.55 | 33.8  | 0.121 | 54 | 1 |
| 10 | 162 | 84  | 29.15 | 155.55 | 27.7  | 0.182 | 54 | 0 |
| 8  | 125 | 96  | 29.15 | 155.55 | 32.46 | 0.232 | 54 | 1 |
| 7  | 150 | 78  | 29    | 126    | 35.2  | 0.692 | 54 | 1 |
| 9  | 171 | 110 | 24    | 240    | 45.4  | 0.721 | 54 | 1 |

|    |     |     |       |        |      |       |    |   |
|----|-----|-----|-------|--------|------|-------|----|---|
| 2  | 109 | 92  | 29.15 | 155.55 | 42.7 | 0.845 | 54 | 0 |
| 6  | 137 | 61  | 29.15 | 155.55 | 24.2 | 0.151 | 55 | 0 |
| 7  | 195 | 70  | 33    | 145    | 25.1 | 0.163 | 55 | 1 |
| 3  | 128 | 78  | 29.15 | 155.55 | 21.1 | 0.268 | 55 | 0 |
| 6  | 103 | 72  | 32    | 190    | 37.7 | 0.324 | 55 | 0 |
| 10 | 94  | 72  | 18    | 155.55 | 23.1 | 0.595 | 56 | 0 |
| 10 | 90  | 85  | 32    | 155.55 | 34.9 | 0.825 | 56 | 1 |
| 4  | 111 | 72  | 47    | 207    | 37.1 | 1.39  | 56 | 1 |
| 13 | 145 | 82  | 19    | 110    | 22.2 | 0.245 | 57 | 0 |
| 8  | 95  | 72  | 29.15 | 155.55 | 36.8 | 0.485 | 57 | 0 |
| 8  | 196 | 76  | 29    | 280    | 37.5 | 0.605 | 57 | 1 |
| 5  | 114 | 74  | 29.15 | 155.55 | 24.9 | 0.744 | 57 | 0 |
| 10 | 139 | 80  | 29.15 | 155.55 | 27.1 | 1.441 | 57 | 0 |
| 9  | 91  | 68  | 29.15 | 155.55 | 24.2 | 0.2   | 58 | 0 |
| 8  | 110 | 76  | 29.15 | 155.55 | 27.8 | 0.237 | 58 | 0 |
| 5  | 144 | 82  | 26    | 285    | 32   | 0.452 | 58 | 1 |
| 8  | 176 | 90  | 34    | 300    | 33.7 | 0.467 | 58 | 1 |
| 12 | 140 | 82  | 43    | 325    | 39.2 | 0.528 | 58 | 1 |
| 8  | 112 | 72  | 29.15 | 155.55 | 23.6 | 0.84  | 58 | 0 |
| 0  | 173 | 78  | 32    | 265    | 46.5 | 1.159 | 58 | 0 |
| 6  | 194 | 78  | 29.15 | 155.55 | 23.5 | 0.129 | 59 | 1 |
| 0  | 137 | 84  | 27    | 155.55 | 27.3 | 0.231 | 59 | 0 |
| 1  | 189 | 60  | 23    | 846    | 30.1 | 0.398 | 59 | 1 |
| 7  | 179 | 95  | 31    | 155.55 | 34.2 | 0.164 | 60 | 0 |
| 4  | 134 | 72  | 29.15 | 155.55 | 23.8 | 0.277 | 60 | 1 |
| 5  | 109 | 75  | 26    | 155.55 | 36   | 0.546 | 60 | 0 |
| 6  | 129 | 90  | 7     | 326    | 19.6 | 0.582 | 60 | 0 |
| 8  | 181 | 68  | 36    | 495    | 30.1 | 0.615 | 60 | 1 |
| 4  | 146 | 92  | 29.15 | 155.55 | 31.2 | 0.539 | 61 | 1 |
| 7  | 142 | 60  | 33    | 190    | 28.8 | 0.687 | 61 | 0 |
| 12 | 121 | 78  | 17    | 155.55 | 26.5 | 0.259 | 62 | 0 |
| 2  | 197 | 70  | 99    | 155.55 | 34.7 | 0.575 | 62 | 1 |
| 1  | 135 | 54  | 29.15 | 155.55 | 26.7 | 0.687 | 62 | 0 |
| 0  | 105 | 84  | 29.15 | 155.55 | 27.9 | 0.741 | 62 | 1 |
| 10 | 101 | 76  | 48    | 180    | 32.9 | 0.171 | 63 | 0 |
| 3  | 142 | 80  | 15    | 155.55 | 32.4 | 0.2   | 63 | 0 |
| 5  | 158 | 70  | 29.15 | 155.55 | 29.8 | 0.207 | 63 | 0 |
| 4  | 132 | 86  | 31    | 155.55 | 28   | 0.419 | 63 | 0 |
| 8  | 120 | 78  | 29.15 | 155.55 | 25   | 0.409 | 64 | 0 |
| 5  | 147 | 78  | 29.15 | 155.55 | 33.7 | 0.218 | 65 | 0 |
| 0  | 161 | 50  | 29.15 | 155.55 | 21.9 | 0.254 | 65 | 0 |
| 5  | 103 | 108 | 37    | 155.55 | 39.2 | 0.305 | 65 | 0 |
| 6  | 114 | 88  | 29.15 | 155.55 | 27.8 | 0.247 | 66 | 0 |
| 6  | 190 | 92  | 29.15 | 155.55 | 35.5 | 0.278 | 66 | 1 |
| 6  | 166 | 74  | 29.15 | 155.55 | 26.6 | 0.304 | 66 | 0 |
| 2  | 158 | 90  | 29.15 | 155.55 | 31.6 | 0.805 | 66 | 1 |
| 4  | 146 | 78  | 29.15 | 155.55 | 38.5 | 0.52  | 67 | 1 |
| 8  | 194 | 80  | 29.15 | 155.55 | 26.1 | 0.551 | 67 | 0 |
| 0  | 57  | 60  | 29.15 | 155.55 | 21.7 | 0.735 | 67 | 0 |
| 8  | 91  | 82  | 29.15 | 155.55 | 35.6 | 0.587 | 68 | 0 |
| 5  | 132 | 80  | 29.15 | 155.55 | 26.8 | 0.186 | 69 | 0 |

|   |     |       |       |        |       |       |    |   |
|---|-----|-------|-------|--------|-------|-------|----|---|
| 5 | 136 | 82    | 29.15 | 155.55 | 32.46 | 0.64  | 69 | 0 |
| 4 | 145 | 82    | 18    | 155.55 | 32.5  | 0.235 | 70 | 1 |
| 2 | 119 | 72.41 | 29.15 | 155.55 | 19.6  | 0.832 | 72 | 0 |
| 9 | 134 | 74    | 33    | 60     | 25.9  | 0.46  | 81 | 0 |
