# Supplementary material for: Improved Functional Causal Likelihood-Based Causal Discovery Method for Diabetes Risk Factors
Source: Comput Math Methods Med. 2021 May 14;2021:5552085. doi: 10.1155/2021/5552085 (PMC8143882; doi:10.1155/2021/5552085)
Supplement: Supplementary Materials — See Datasets S1–S2, Source Code S3, and Editorial Certificate S4 in the Supplementary Material for simulation experiments. [file 5552085.f1.zip]

Archive with 4 entries (4 files):
- S1.pdf
- S2.pdf
- S3.pdf
- S4.pdf
